# Supplementary material for: Argininamide-type neuropeptide Y Y1 receptor antagonists: the nature of Nω-carbamoyl substituents determines Y1R binding mode and affinity
Source: Royal Society of Chemistry journal article supplement (doi:10.1039/c9md00538b), 2020-01-01
Supplement: c9md00538b1.pdf [file c9md00538b1.pdf]

## Supplementary Information

### Argininamide-Type Neuropeptide Y Y<sub>1</sub> Receptor Antagonists: The Nature of N<sup>ω</sup>-Carbamoyl Substituents Determines Y<sub>1</sub>R Binding Mode and Affinity

Jonas Buschmann, Theresa Seiler, Günther Bernhardt, Max Keller, and David Wifling\*

Institute of Pharmacy, Faculty of Chemistry and Pharmacy, University of Regensburg, Universitätsstrasse 31, D-93053 Regensburg, Germany

#### Table of Contents

|                                                                                                                                 |     |
|---------------------------------------------------------------------------------------------------------------------------------|-----|
| 1. Figures S1-S2                                                                                                                | S2  |
| 2. Table S1                                                                                                                     | S4  |
| 3. Synthesis Protocols and Analytical Data of Compounds <b>23-34</b> , <b>38-39</b> , <b>41-42</b> , <b>53-76</b> and <b>78</b> | S4  |
| 4. <sup>1</sup> H-NMR und <sup>13</sup> C-NMR Spectra of Compounds <b>53-76</b>                                                 | S15 |
| 5. RP-HPLC Purity Chromatograms of Compounds <b>53-76</b> and <b>78</b>                                                         | S39 |
| 6. Investigation of the Chemical Stability of Compounds <b>56</b> , <b>58-61</b> , <b>63</b> and <b>68</b>                      | S43 |
| 7. References                                                                                                                   | S45 |

# 1. Figures S1-S2

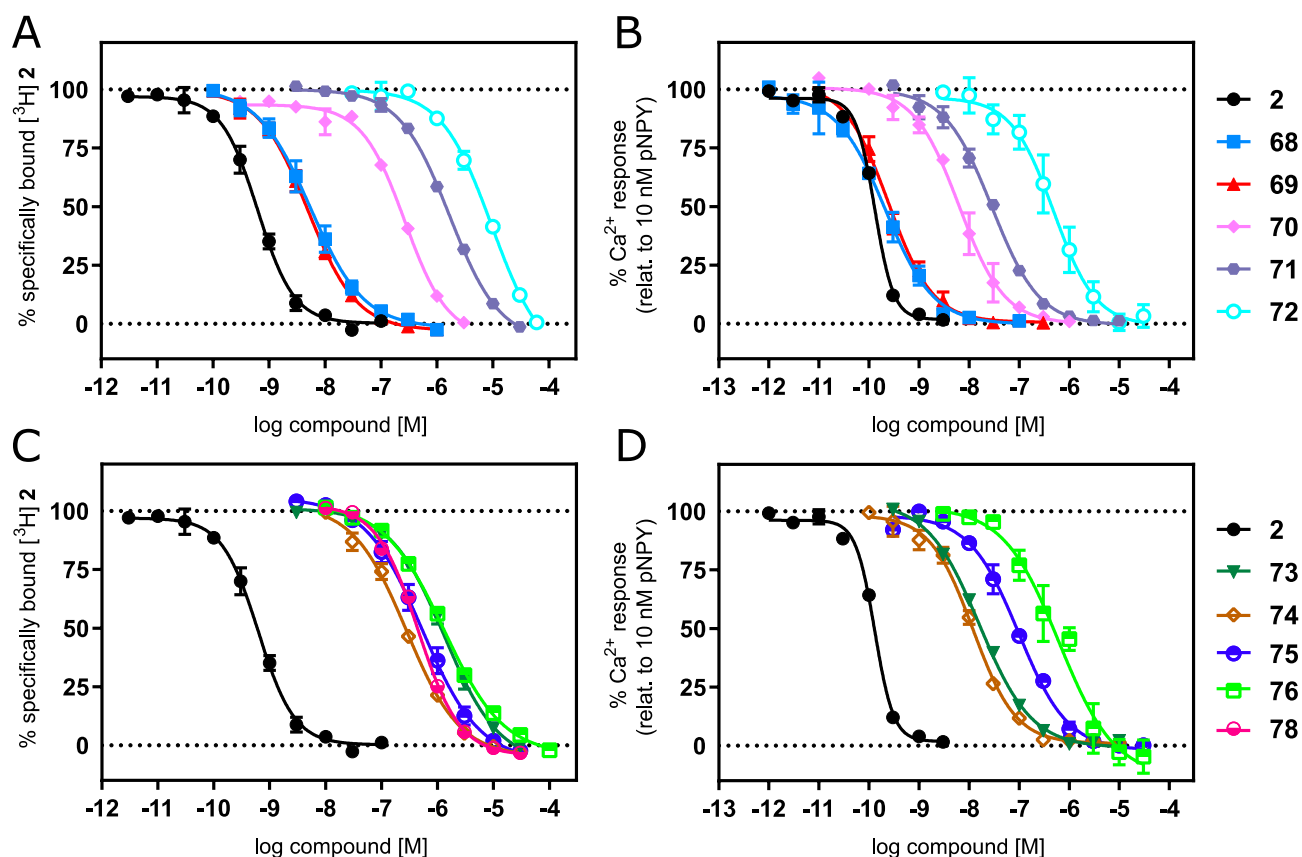

**Figure S1.** (A, C) Displacement curves of  $[^3\text{H}]\text{2}$  (c = 0.15 nM) obtained from competition binding studies with **68-72** (A), **73-76, 78** (C) and reference compound **2** at  $\text{Y}_1\text{R}$ -expressing SK-N-MC cells. (B, D) Concentration dependent inhibition curves obtained from the Fura-2  $\text{Ca}^{2+}$  assay at intact HEL cells. The intracellular  $\text{Ca}^{2+}$  mobilization was induced by 10 nM pNPY after preincubation of the cells with **68-72** (B), **73-76** (D), respectively, for 15 min or the reference compound **2** for 20 min. (A-D) Data of compound **2** were taken from Keller et. al.<sup>1</sup>

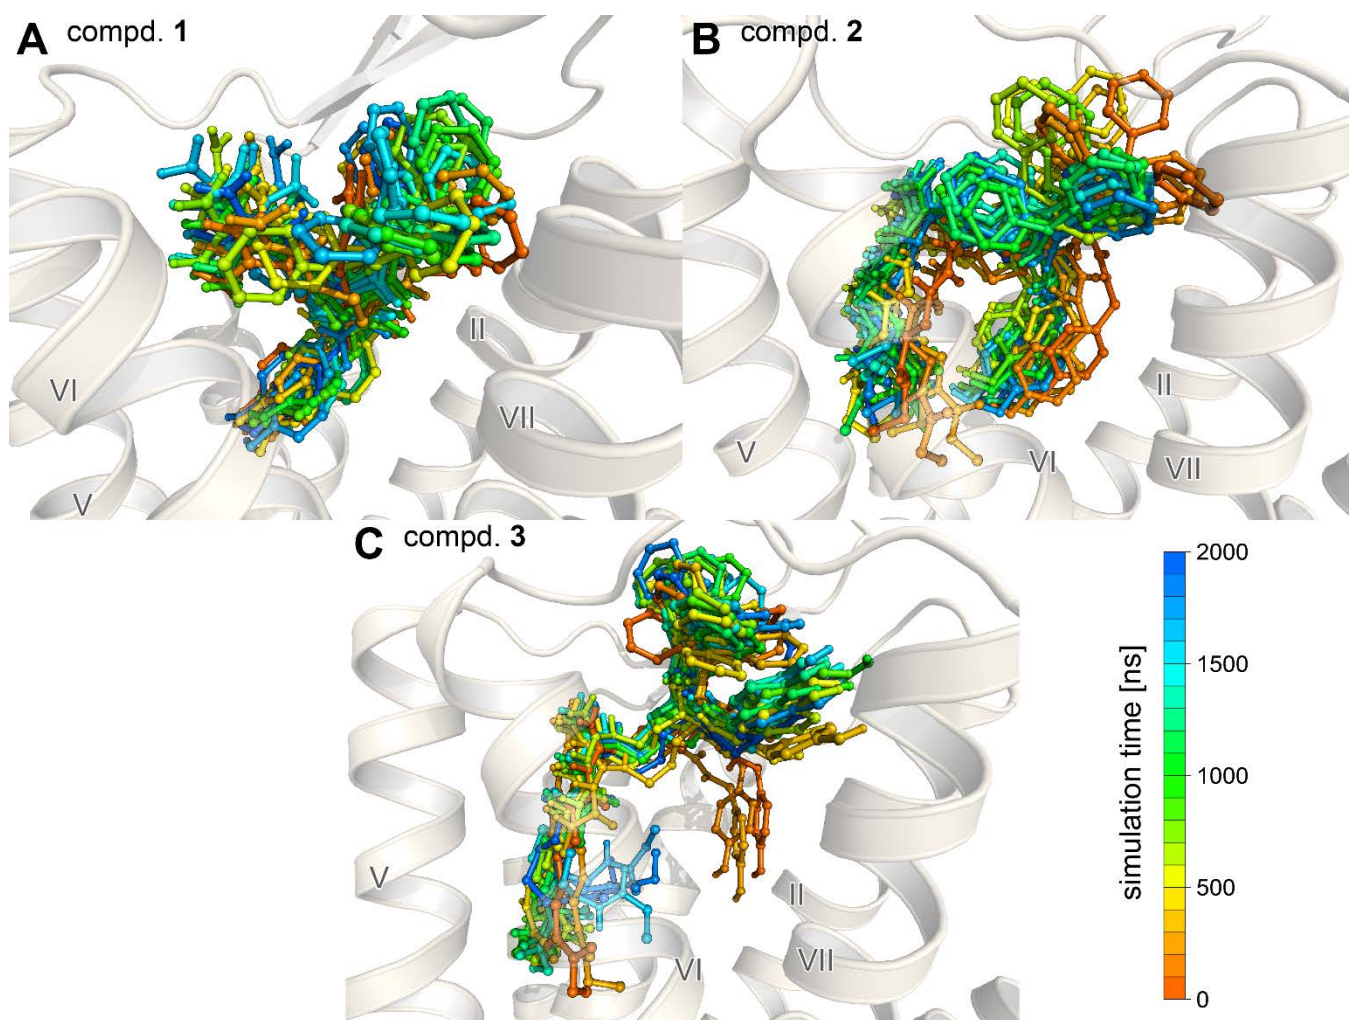

**Figure S2.** Time-course illustrations of the 2- $\mu$ s MD simulations of the Y<sub>1</sub>R (inactive state, PDB ID: 5ZBQ<sup>2</sup>) bound to **1** (A), **2** (B) or **3** (C) showing superimposed snapshots collected every 100 ns.

## 2. Table S1

**Table S1** Slope factors (Hill slope) of compounds **53-76** and **78** determined by equilibrium competition binding with [<sup>3</sup>H]**2** and in the Fura-2 Ca<sup>2+</sup> assay, respectively.

| compd.    | slope ± SEM <sup>a</sup><br>(competition binding) | slope ± SEM <sup>b</sup><br>(Fura-2 Ca <sup>2+</sup> ) | compd.    | slope ± SEM <sup>a</sup><br>(competition binding) | slope ± SEM <sup>b</sup><br>(Fura-2 Ca <sup>2+</sup> ) |
|-----------|---------------------------------------------------|--------------------------------------------------------|-----------|---------------------------------------------------|--------------------------------------------------------|
| <b>53</b> | -1.05 ± 0.07                                      | n.d.                                                   | <b>66</b> | -1.17 ± 0.08                                      | -1.17 ± 0.11                                           |
| <b>54</b> | -1.06 ± 0.03                                      | n.d.                                                   | <b>67</b> | -0.97 ± 0.05                                      | -1.30 ± 0.21                                           |
| <b>55</b> | -0.97 ± 0.10                                      | n.d.                                                   | <b>68</b> | -1.02 ± 0.09                                      | -0.96 ± 0.07                                           |
| <b>56</b> | -1.27 ± 0.10                                      | -2.36 ± 0.09**                                         | <b>69</b> | -1.00 ± 0.07                                      | -1.07 ± 0.24                                           |
| <b>57</b> | -1.25 ± 0.06*                                     | -1.92 ± 0.09**                                         | <b>70</b> | -1.03 ± 0.14                                      | -1.13 ± 0.30                                           |
| <b>58</b> | -1.08 ± 0.08                                      | -2.17 ± 0.15**                                         | <b>71</b> | -1.00 ± 0.04                                      | -1.02 ± 0.05                                           |
| <b>59</b> | -1.17 ± 0.03*                                     | -1.74 ± 0.22*                                          | <b>72</b> | -0.98 ± 0.07                                      | -1.19 ± 0.12                                           |
| <b>60</b> | -1.03 ± 0.09                                      | -1.79 ± 0.29                                           | <b>73</b> | -0.91 ± 0.16                                      | -0.99 ± 0.07                                           |
| <b>61</b> | -1.02 ± 0.01                                      | -0.79 ± 0.07                                           | <b>74</b> | -0.90 ± 0.03*                                     | -0.83 ± 0.01**                                         |
| <b>62</b> | -1.01 ± 0.08                                      | -1.39 ± 0.21                                           | <b>75</b> | -0.89 ± 0.06                                      | -0.86 ± 0.12                                           |
| <b>63</b> | -1.10 ± 0.18                                      | -1.27 ± 0.16                                           | <b>76</b> | -0.82 ± 0.08                                      | -1.00 ± 0.11                                           |
| <b>64</b> | -0.89 ± 0.05                                      | -0.69 ± 0.07*                                          | <b>78</b> | -1.17 ± 0.03*                                     | n.d.                                                   |
| <b>65</b> | -0.81 ± 0.07                                      | -0.83 ± 0.04                                           |           |                                                   |                                                        |

<sup>a</sup>Slope factors of the four-parameter logistic fit (GraphPad Prism 8) obtained from analysis of radioligand competition binding data. Mean values ± SEM from at least three independent experiments performed in triplicate. <sup>b</sup>Slope factors of the four-parameter logistic fit (GraphPad Prism 8) obtained from analysis of the Fura-2 Ca<sup>2+</sup> data. Mean values ± SEM from at least three independent experiments performed in singlet. \*Slope significantly different from unity,  $P \leq 0.05$  (one sample, two-tailed t-test). \*\*Slope significantly different from unity,  $P \leq 0.01$  (one sample, two-tailed t-test). n.d.: not determined.

## 3. Synthesis Protocols and Analytical Data of Compounds **23-34**, **38-39**, **41-42**, **53-76** and **78**

**Succinimidyl 2-methylpropionate (23).**<sup>3</sup> A solution of DCC (0.89 g, 4.31 mmol) in CH<sub>2</sub>Cl<sub>2</sub> (1 mL) and of 2-methylpropionic acid (**10**) (369 µL, 3.98 mmol) in CH<sub>2</sub>Cl<sub>2</sub> (1 mL) were dropped to an ice-cold solution of **22** (0.46 g, 4.00 mmol) in CH<sub>2</sub>Cl<sub>2</sub> (6 mL) and DMF (0.4 mL). The reaction mixture was stirred on an ice bath for 2 h and then at rt overnight. Afterwards, the reaction mixture was filtered and the solid washed (3x) with CH<sub>2</sub>Cl<sub>2</sub>. The filtrate was washed with a saturated solution of NaHCO<sub>3</sub> (100 mL) and the organic phase dried over Na<sub>2</sub>SO<sub>4</sub>. The solvent was removed by evaporation, the residue was taken up in CH<sub>2</sub>Cl<sub>2</sub> and crystallization, initiated by the addition of light petroleum, afforded **23** (0.22 g, 1.19 mmol, 30%) as a white solid. <sup>1</sup>H NMR (300 MHz, CDCl<sub>3</sub>): δ (ppm) 1.32 (d, *J* 7.0 Hz, 6H), 2.82 (s, 4H, interfering with the next signal), 2.88 (septet, 1H, *J* 7.0 Hz). <sup>13</sup>C NMR (75 MHz, CDCl<sub>3</sub>): δ (ppm) 18.9, 25.7, 31.8, 169.4, 172.2. HRMS (APCI): *m/z* [M+H]<sup>+</sup> calc. for [C<sub>8</sub>H<sub>12</sub>NO<sub>4</sub>]<sup>+</sup> 186.0766, found 186.0765. C<sub>8</sub>H<sub>11</sub>NO<sub>4</sub> (185.18).

**Succinimidyl 2,2-dimethylpropionate (24).**<sup>4</sup> A solution of DCC (1.13 g, 5.48 mmol) in CH<sub>2</sub>Cl<sub>2</sub> (1 mL) and of 2,2-dimethylpropionic acid (**11**) (0.50 g, 4.90 mmol) in CH<sub>2</sub>Cl<sub>2</sub> (1 mL) were dropped to an ice-cold solution of **22** (0.46 g, 4.00 mmol) in CH<sub>2</sub>Cl<sub>2</sub> (6 mL) and DMF (0.4 mL). The reaction mixture was stirred on an ice bath for 2 h and then at rt overnight. Afterwards, the reaction mixture was filtered and the solid washed (3x) with CH<sub>2</sub>Cl<sub>2</sub>. The filtrate was washed with a saturated solution of NaHCO<sub>3</sub> (100 mL), and the organic phase dried over Na<sub>2</sub>SO<sub>4</sub>. The solvent was removed by evaporation, the residue was taken up in CH<sub>2</sub>Cl<sub>2</sub> and crystallization, initiated by the addition of light petroleum, afforded **24** (0.28 g, 1.41 mmol, 35%) as a white solid. <sup>1</sup>H NMR (400 MHz, CDCl<sub>3</sub>): δ (ppm) 1.37 (s, 9H), 2.78-2.84 (m, 4H). <sup>13</sup>C NMR (101 MHz, CDCl<sub>3</sub>): δ (ppm) 25.7, 27.1, 38.5, 169.3, 173.5. HRMS (APCI): *m/z* [M+H]<sup>+</sup> calc. for [C<sub>9</sub>H<sub>14</sub>NO<sub>4</sub>]<sup>+</sup> 200.0923, found 200.0918. C<sub>9</sub>H<sub>13</sub>NO<sub>4</sub> (199.21).

**Succinimidyl N-Boc-glycinate (25).**<sup>5</sup> DCC (0.61 g, 2.97 mmol) was dissolved in CH<sub>2</sub>Cl<sub>2</sub> and dropped to an ice-cold solution of **22** (0.34 g, 2.97 mmol) and N-Boc-glycinate (**12**) (0.40 g, 2.28 mmol) in CH<sub>2</sub>Cl<sub>2</sub> (10 mL). The reaction mixture was stirred on an ice bath for 2 h. Afterwards, the reaction mixture was filtered and the solid washed (3x) with CH<sub>2</sub>Cl<sub>2</sub>. The filtrate was washed with a saturated solution of NaHCO<sub>3</sub> (2x 75 mL), and the organic phase dried over Na<sub>2</sub>SO<sub>4</sub>. The solvent was evaporation at reduced pressure and **25** (0.53 g,

1.95 mmol, 86%) was obtained as a white solid.  $^1\text{H}$  NMR (400 MHz,  $\text{DMSO}-d_6$ ):  $\delta$  (ppm) 1.39 (s, 9H), 2.81 (s, 4H), 4.09 (d,  $J$  6.2 Hz, 2H), 7.48 (t,  $J$  6.1 Hz, 1H).  $^{13}\text{C}$  NMR (101 MHz,  $\text{DMSO}-d_6$ ):  $\delta$  (ppm) 25.4, 28.1, 39.8, 78.8, 155.6, 166.9, 170.0. HRMS (APCI):  $m/z$   $[\text{M}+\text{NH}_4]^+$  calc. for  $[\text{C}_{11}\text{H}_{20}\text{N}_3\text{O}_6]^+$  290.1352, found 290.1350.  $\text{C}_{11}\text{H}_{16}\text{N}_2\text{O}_6$  (272.26).

**Succinimidyl benzoate (26).**<sup>6</sup> DCC (1.10 g, 5.33 mmol) was dissolved in THF (10 mL) and dropped to an ice-cold solution of **22** (0.82 g, 3.13 mmol) and benzoic acid (**13**) (0.50 g, 4.09 mmol) in THF (30 mL). The reaction mixture was stirred on an ice bath for 2 h and then at rt overnight. Afterwards, the reaction mixture was filtered, the solid washed (2x) with THF (5 mL) and the organic solvent dried over  $\text{Na}_2\text{SO}_4$  and evaporated at reduced pressure. The crude product was purified by column chromatography (eluent:  $\text{CH}_2\text{Cl}_2/\text{MeOH}$  97:3) to obtain **26** (0.59 g, 2.69 mmol, 86%) as white solid.  $^1\text{H}$  NMR (300 MHz,  $\text{DMSO}-d_6$ ):  $\delta$  (ppm) 2.90 (s, 4H), 7.62-7.70 (m, 2H), 7.80-7.88 (m, 1H), 8.07-8.14 (m, 2H).  $^{13}\text{C}$  NMR (75 MHz,  $\text{DMSO}-d_6$ ):  $\delta$  (ppm) 25.4, 124.4, 129.45, 129.88, 135.5, 161.7, 170.2. HRMS (APCI):  $m/z$   $[\text{M}+\text{H}]^+$  calc. for  $[\text{C}_{11}\text{H}_{10}\text{NO}_4]^+$  220.0610, found 220.0608.  $\text{C}_{11}\text{H}_9\text{NO}_4$  (219.20).

**Succinimidyl phenylacetate (27).**<sup>7</sup> A solution of DCC (0.84 g, 4.07 mmol) in DMF (1 mL) and of 2-phenylacetic acid (**14**) (0.50 g, 3.67 mmol) in DMF (1 mL) were dropped to an ice-cold solution of **22** (0.36 g 7.12 mmol) in DMF (4 mL). The reaction mixture was stirred on an ice bath for 2 h and then at rt overnight. Afterwards, the reaction mixture was filtered and the solid washed (5x) with DMF (1 mL). The organic phase was poured in saturated  $\text{NaHCO}_3$  solution (75 mL), and the aqueous phase extracted with ethyl acetate (3x 75 mL). The combined organic phases were washed (2x) with water, dried over  $\text{MgSO}_4$ , and evaporated under reduced pressure. The crude product was purified by column chromatography (eluent: light petroleum/ethyl acetate 1:2) to obtain **27** (0.61 g, 2.62 mmol, 84%) as white solid.  $^1\text{H}$  NMR (300 MHz,  $\text{CDCl}_3$ ):  $\delta$  (ppm) 2.81 (s, 4H), 3.94 (s, 2H), 7.28-7.41 (m, 5H).  $^{13}\text{C}$  NMR (75 MHz,  $\text{CDCl}_3$ ):  $\delta$  (ppm) 25.7, 37.7, 127.9, 129.0, 129.4, 131.5, 166.9, 169.1. HRMS (APCI):  $m/z$   $[\text{M}+\text{H}]^+$  calc. for  $[\text{C}_{12}\text{H}_{12}\text{NO}_4]^+$  234.0766, found 234.0765.  $\text{C}_{12}\text{H}_{11}\text{NO}_4$  (233.22).

**Succinimidyl diphenylacetate (28).**<sup>8</sup> DCC (1.08 g, 5.23 mmol) was dissolved in  $\text{CH}_2\text{Cl}_2$  (1 mL) and dropped to an ice-cold solution of **22** (0.36 g, 3.1 mmol) and diphenylacetic acid (**15**) (0.20 g, 0.94 mmol) in  $\text{CH}_2\text{Cl}_2$  (10 mL). The reaction mixture was stirred on an ice bath for 2 h. Afterwards, the reaction mixture was filtered and the solid washed (3x) with  $\text{CH}_2\text{Cl}_2$ . The filtrate was washed with a saturated solution of  $\text{NaHCO}_3$  (3x 100 mL) and the organic phase dried over  $\text{Na}_2\text{SO}_4$ . The solvent was evaporated at reduced pressure and the crude product was purified by column chromatography (eluent light petroleum/ethyl acetate 2:1 to 1:1) to obtain **28** (0.50 g, 1.62 mmol, 72%) as a white solid.  $^1\text{H}$  NMR (400 MHz,  $\text{CDCl}_3$ ):  $\delta$  (ppm) 2.66 (s, 4H), 5.25 (s, 1H), 7.18-7.31 (m, 10H).  $^{13}\text{C}$  NMR (101 MHz,  $\text{CDCl}_3$ ):  $\delta$  (ppm) 25.7, 54.1, 128.00, 128.79, 128.96, 136.8, 168.2, 169.0. HRMS (APCI):  $m/z$   $[\text{M}+\text{N}]^+$  calc. for  $[\text{C}_{18}\text{H}_{16}\text{NO}_4]^+$  310.1079, found 310.1075.  $\text{C}_{18}\text{H}_{15}\text{NO}_4$  (309.32).

**Succinimidyl cyclopropanecarboxylat (29).**<sup>9</sup> A solution of DCC (0.93 g, 4.51 mmol) in  $\text{CH}_2\text{Cl}_2$  (1 mL) and of cyclopropane carboxylic acid (**16**) (324  $\mu\text{L}$ , 4.07 mmol) in  $\text{CH}_2\text{Cl}_2$  (1 mL) were dropped to an ice-cold solution of **22** (0.48 g, 4.17 mmol) in  $\text{CH}_2\text{Cl}_2$  (6 mL) and DMF (0.4 mL). The reaction mixture was stirred on an ice bath for 2 h and then at rt overnight. Afterwards, the reaction mixture was filtered and the solid washed (3x) with  $\text{CH}_2\text{Cl}_2$ . The filtrate was washed with a saturated solution of  $\text{NaHCO}_3$  (100 mL), and the organic phase dried over  $\text{Na}_2\text{SO}_4$ . The solvent was removed by evaporation, the residue was taken up in  $\text{CH}_2\text{Cl}_2$  and crystallization, initiated by the addition of light petroleum, afforded **29** (0.33 g, 1.80 mmol, 43%) as a white solid.  $^1\text{H}$  NMR (400 MHz,  $\text{CDCl}_3$ ):  $\delta$  (ppm) 1.05-1.24 (m, 4H), 1.81-1.94 (m, 1H), 2.80 (s, 4H).  $^{13}\text{C}$  NMR (101 MHz,  $\text{CDCl}_3$ ):  $\delta$  (ppm) 10.3, 10.6, 25.6, 169.4, 170.3. HRMS (APCI):  $m/z$   $[\text{M}+\text{H}]^+$  calc. for  $[\text{C}_8\text{H}_{10}\text{NO}_4]^+$  184.0610, found 184.0606.  $\text{C}_8\text{H}_9\text{NO}_4$  (183.16).

**Succinimidyl cyclobutanecarboxylat (30).**<sup>10</sup> A solution of DCC (0.81 g, 3.93 mmol) in ethyl acetate (1 mL) and of cyclobutanecarboxylic acid (**17**) (335  $\mu\text{L}$ , 3.50 mmol) in ethyl acetate (1 mL) were dropped to an ice-cold solution of **22** (0.35 g, 3.04 mmol) in ethyl acetate (6 mL) and DMF (0.4 mL). The reaction mixture was stirred on an ice bath for 2 h and then at rt overnight. Afterwards, the reaction mixture was filtered and the solid washed (3x) with  $\text{CH}_2\text{Cl}_2$ . The filtrate was washed with a saturated solution of  $\text{NaHCO}_3$  (100 mL), and the organic phase dried over  $\text{Na}_2\text{SO}_4$ . The solvent was removed by evaporation, the residue was taken up in  $\text{CH}_2\text{Cl}_2$  and crystallization, initiated by the addition of light petroleum, afforded **30** (0.22 g, 1.11 mmol, 37%) as a white solid.  $^1\text{H}$  NMR (300 MHz,  $\text{CDCl}_3$ ):  $\delta$  (ppm) 1.93-2.14 (m, 2H), 2.30-2.53 (m, 4H), 2.78-2.89 (m, 4H),

3.37-3.51 (m, 1H).  $^{13}\text{C}$  NMR (75 MHz,  $\text{CDCl}_3$ ):  $\delta$  (ppm) 18.9, 25.5, 25.8, 35.2, 169.5, 170.7. HRMS (APCI):  $m/z$   $[\text{M}+\text{H}]^+$  calc. for  $[\text{C}_9\text{H}_{12}\text{NO}_4]^+$  198.0766, found 198.0764.  $\text{C}_9\text{H}_{11}\text{NO}_4$  (197.19).

**Succinimidyl cyclopentanecarboxylat (31).** A solution of DCC (0.70 g, 3.39 mmol) in ethyl acetate (1 mL) and of cyclopentanecarboxylic acid (**18**) (333  $\mu\text{L}$ , 3.07 mmol) in ethyl acetate (1 mL) were dropped to an ice-cold solution of **22** (0.35 g, 3.04 mmol) in ethyl acetate (6 mL) and DMF (0.4 mL). The reaction mixture was stirred on an ice bath for 2 h and then at rt overnight. Afterwards, the reaction mixture was filtered and the solid washed (3x) with  $\text{CH}_2\text{Cl}_2$ . The filtrate was washed with a saturated solution of  $\text{NaHCO}_3$  (100 mL), and the organic phase dried over  $\text{Na}_2\text{SO}_4$ . The solvent was removed by evaporation, the residue was taken up in  $\text{CH}_2\text{Cl}_2$  and crystallization, initiated by the addition of light petroleum, afforded **31** (0.33 g, 1.56 mmol, 51%) as a white solid.  $^1\text{H}$  NMR (300 MHz,  $\text{CDCl}_3$ ):  $\delta$  (ppm) 1.58-1.79 (m, 4H), 1.89-2.09 (m, 4H), 2.78-2.88 (m, 4H), 2.97-3.11 (m, 1H).  $^{13}\text{C}$  NMR (75 MHz,  $\text{CDCl}_3$ ):  $\delta$  (ppm) 25.7, 26.0, 30.3, 40.7, 169.5, 172.0. HRMS (APCI):  $m/z$   $[\text{M}+\text{NH}_4]^+$  calc. for  $[\text{C}_{10}\text{H}_{17}\text{N}_2\text{O}_4]^+$  229.1188, found 229.1187.  $\text{C}_{10}\text{H}_{13}\text{NO}_4$  (211.22).

**Succinimidyl cyclohexanecarboxylat (32).**<sup>10, 11</sup> A solution of DCC (0.77 g, 3.73 mmol) in ethyl acetate (1 mL) and of cyclohexanecarboxylic acid (**19**) (0.36 g, 2.81 mmol) in ethyl acetate (1 mL) were dropped to an ice-cold solution of **22** (0.41 g, 3.56 mmol) in ethyl acetate (6 mL) and DMF (0.4 mL). The reaction mixture was stirred on an ice bath for 2 h and then at rt overnight. Afterwards, the reaction mixture was filtered and the solid washed (3x) with  $\text{CH}_2\text{Cl}_2$ . The filtrate was washed with a saturated solution of  $\text{NaHCO}_3$  (100 mL), and the organic phase dried over  $\text{Na}_2\text{SO}_4$ . The solvent was removed by evaporation, the residue was taken up in  $\text{CH}_2\text{Cl}_2$  and crystallization, initiated by the addition of light petroleum, afforded **32** (0.40 g, 1.67 mmol, 59%) as a white solid.  $^1\text{H}$  NMR (300 MHz,  $\text{DMSO}-d_6$ ):  $\delta$  (ppm) 1.19-1.62 (m, 7H), 1.64-1.75 (m, 2H), 1.86-1.96 (m, 2H), 2.80 (s, 4H).  $^{13}\text{C}$  NMR (75 MHz,  $\text{DMSO}-d_6$ ):  $\delta$  (ppm) 24.3, 25.0, 25.5, 28.4, 39.4, 170.3, 170.9. HRMS (APCI):  $m/z$   $[\text{M}+\text{NH}_4]^+$  calc. for  $[\text{C}_{11}\text{H}_{19}\text{N}_2\text{O}_4]^+$  243.1345, found 243.1346.  $\text{C}_{11}\text{H}_{15}\text{NO}_4$  (225.24).

**Succinimidyl cyclohexylacetate (33).** A solution of DCC (0.58 g, 2.81 mmol) in  $\text{CH}_2\text{Cl}_2$  (1 mL) and of cyclohexylacetic acid (**20**) (0.36 g, 2.53 mmol) in  $\text{CH}_2\text{Cl}_2$  (1 mL) were dropped to an ice-cold solution of **22** (0.29 g, 2.52 mmol) in  $\text{CH}_2\text{Cl}_2$  (6 mL) and DMF (0.4 mL). The reaction mixture was stirred on an ice bath for 2 h and then at rt overnight. Afterwards, the reaction mixture was filtered and the solid washed (3x) with  $\text{CH}_2\text{Cl}_2$ . The filtrate was washed with a saturated solution of  $\text{NaHCO}_3$  (100 mL), and the organic phase dried over  $\text{Na}_2\text{SO}_4$ . The solvent was removed by evaporation, the residue was taken up in  $\text{CH}_2\text{Cl}_2$  and crystallization, initiated by the addition of light petroleum, afforded **33** (0.25 g, 1.04 mmol, 41%) as a white solid.  $^1\text{H}$  NMR (300 MHz,  $\text{CDCl}_3$ ):  $\delta$  (ppm) 0.99-1.33 (m, 5H), 1.62-1.92 (m, 6H), 2.46 (d,  $J$  6.7 Hz, 2H), 2.83 (s, 4H).  $^{13}\text{C}$  NMR (75 MHz,  $\text{CDCl}_3$ ):  $\delta$  (ppm) 25.8, 26.1, 26.2, 33.0, 35.1, 38.8, 168.1, 169.5. HRMS (APCI):  $m/z$   $[\text{M}+\text{NH}_4]^+$  calc. for  $[\text{C}_{12}\text{H}_{21}\text{N}_2\text{O}_4]^+$  257.1501, found 257.1506.  $\text{C}_{12}\text{H}_{17}\text{NO}_4$  (239.27).

**Succinimidyl trifluoroacetate (34).**<sup>12</sup> **22** (0.35 g, 3.04 mmol) was dissolved in THF (6 mL), trifluoroacetic acid anhydride (**21**) (0.90 mL, 6.38 mmol) was added dropwise and the solution stirred at rt for 3 h. After evaporation of the solvent, toluene (3 mL) was added and evaporated (3x) to obtain **34** (0.64 g, 3.04 mmol, 100%) as a white solid.  $^1\text{H}$  NMR (300 MHz,  $\text{DMSO}-d_6$ ):  $\delta$  (ppm) 2.59 (s, 4H).  $\text{C}_6\text{H}_4\text{F}_3\text{NO}_4$  (211.10).

**N-tert-Butoxycarbonyl-N'-[2(tert-butoxycarbonylamino)ethyl]aminocarbonyl-S-methylisothiourea (38).**<sup>1, 13</sup> A solution of *tert*-butyl (2-aminoethyl)carbamate (**36**) (0.62 g, 3.87 mmol) and DIPEA (1.91 mL, 11.2 mmol) in anhydrous  $\text{CH}_2\text{Cl}_2$  (7 mL) was added dropwise to an ice-cold solution of triphosgene (0.57 g, 1.92 mmol) in anhydrous  $\text{CH}_2\text{Cl}_2$  (5 mL). The reaction mixture was stirred at rt for 30 min, N-Boc-S-methylisothiourea (**35**) (0.79 g, 4.93 mmol) was added, and after 1.5 h, the solvent was removed by evaporation at reduced pressure. The crude product was purified by column chromatography (eluent  $\text{CH}_2\text{Cl}_2$ /ethyl acetate 98:2 to 90:10) to obtain **38** (1.03 g, 2.74 mmol, 71%) as a white solid.  $^1\text{H}$  NMR (300 MHz,  $\text{DMSO}-d_6$ ):  $\delta$  (ppm) 1.37 (s, 9H), 1.44 (s, 9H), 2.28 (s, 3H), 2.97-3.11 (m, 4H), 6.82 (t,  $J$  5.2 Hz, 1H), 7.72 (t,  $J$  5.3 Hz, 1H), 12.32 (br s, 1H).  $^{13}\text{C}$  NMR (75 MHz,  $\text{DMSO}-d_6$ ):  $\delta$  (ppm) 13.5, 27.5, 28.1, 39.5, 39.8, 77.6, 82.1, 150.1, 155.6, 161.5, 164.8. HRMS (ESI):  $m/z$   $[\text{M}+\text{H}]^+$  calc. for  $[\text{C}_{15}\text{H}_{29}\text{N}_4\text{O}_5\text{S}]^+$  377.1859, found 377.1866.  $\text{C}_{15}\text{H}_{28}\text{N}_4\text{O}_5\text{S}$  (376.47).

**N-tert-Butoxycarbonyl-N'-[3(tert-butoxycarbonylamino)propyl]aminocarbonyl-S-methylisothiourea (39).**<sup>13</sup> A solution of *tert*-butyl (3-aminopropyl)carbamate (**37**) (5.00 g, 28.7 mmol) and DIPEA (14.7 mL, 86.1 mmol) in anhydrous  $\text{CH}_2\text{Cl}_2$  (50 mL) was added dropwise to an ice-cold solution of triphosgene (4.26 g, 14.4 mmol) in anhydrous  $\text{CH}_2\text{Cl}_2$  (45 mL). The reaction mixture was stirred at rt for 30 min, N-Boc-S-methylisothiourea (**35**) (6.55 g, 34.4 mmol) was added, and after 2 h, the solvent was removed by evaporation at

reduced pressure. The crude product was purified by column chromatography (eluent CH<sub>2</sub>Cl<sub>2</sub>/ethyl acetate 98:2 to 96:4; eluent light petroleum/ethyl acetate 87:13 to 82:18) to obtain **39** (5.56g, 14.2 mmol, 50%) as a yellowish oil. <sup>1</sup>H NMR (400 MHz, DMSO-*d*<sub>6</sub>): δ (ppm) 1.37 (s, 9H), 1.44 (s, 9H), 1.50-1.60 (m, 2H), 2.28 (s, 3H), 2.87-2.97 (m, 2H), 2.99-3.07 (m, 2H), 6.76 (t, *J* 6.8 Hz, 1H), 7.73 (t, *J* 5.8 Hz, 1H), 12.39 (br s, 1H). <sup>13</sup>C NMR (101 MHz, DMSO-*d*<sub>6</sub>): δ (ppm) 13.6, 27.6, 28.2, 29.5, 37.1, 37.7, 77.4, 82.1, 150.2, 155.6, 161.9, 164.8. HRMS (ESI): *m/z* [M+H]<sup>+</sup> calc. for [C<sub>16</sub>H<sub>30</sub>N<sub>4</sub>O<sub>5</sub>Na]<sup>+</sup> 413.1835, found 413.1832. C<sub>16</sub>H<sub>30</sub>N<sub>4</sub>O<sub>5</sub>S (390.50).

**(R)-N<sup>α</sup>-Diphenylacetyl-N<sup>ω</sup>-(aminoethyl)aminocarbonyl(4-hydroxybenzyl)argininamide bis(hydrotrifluoroacetate) (41).**<sup>1</sup> (R)-N'-(4-*tert*-Butoxybenzyl)-N<sup>α</sup>-(2,2-diphenylacetyl)ornithinamide (**40**) (1.31 g, 3.49 mmol) and N-*tert*-butoxycarbonyl-N'-[2(*tert*-butoxycarbonylamino)ethyl]aminocarbonyl-S-methylisothiourea (**38**) (1.50 g, 3.08 mmol) were dissolved in CH<sub>2</sub>Cl<sub>2</sub> (30 mL). HgCl<sub>2</sub> (1.26 g, 4.62 mmol) and DIPEA (1.31 mL, 7.70 mmol) were added and the mixture was stirred at rt for 1 h to afford the crude product that was purified by column chromatography (eluent CH<sub>2</sub>Cl<sub>2</sub>/ethyl acetate 1:1). The purified product was dissolved in CH<sub>2</sub>Cl<sub>2</sub> (7.5 mL), the reaction mixture was cooled to 0°C and TFA (7.5 mL) was added. After 1 h, the mixture was allowed to come to rt and stirred overnight. The solvent was evaporated, and the crude product purified by HPLC (gradient: 0-35 min, A/B 85:15-38:62, *t*<sub>R</sub> = 16 min) to obtain **41** (372.11 mg, 47 mmol, 68%) as a white fluffy solid. <sup>1</sup>H NMR (600 MHz, DMSO-*d*<sub>6</sub>): δ (ppm) 1.36-1.50 (m, 2H), 1.51-1.58 (m, 1H), 1.64-1.72 (m, 1H), 2.93 (br s, 2H), 3.18-3.26 (m, 2H), 3.33-3.38 (m, 2H), 4.09-4.20 (m, 2H), 4.30-4.36 (m, 1H), 5.13 (s, 1H), 6.65-6.69 (m, 2H), 6.98-7.02 (m, 2H), 7.20-7.25 (m, 2H), 7.26-7.31 (m, 8H), 7.61 (br s, 1H), 7.89 (br s, 3H), 8.36 (t, *J* 5.7 Hz, 1H), 8.42-8.65 (br s, 2H, interfering with the next signal), 8.49 (d, *J* 8.1 Hz, 1H), 9.05 (br s, 1H), 9.33 (br s, 1H), 10.81 (br s, 1H). <sup>13</sup>C NMR (151 MHz, DMSO-*d*<sub>6</sub>): δ (ppm) 24.6, 29.4, 37.2, 38.5, 40.4, 41.6, 52.3, 55.9, 115.0, 117.0 (q, *J* 297.1 Hz) (TFA), 126.57, 126.61, 128.17, 128.21, 128.40, 128.50, 128.52, 129.13, 140.3, 140.5, 153.7, 154.4, 156.3, 158.9 (q, *J* 31.6 Hz) (TFA), 170.97, 171.04. HRMS (ESI): *m/z* [M+H]<sup>+</sup> calc. for [C<sub>30</sub>H<sub>38</sub>N<sub>7</sub>O<sub>4</sub>]<sup>+</sup> 560.2985, found 560.2986. C<sub>30</sub>H<sub>37</sub>N<sub>7</sub>O<sub>4</sub> × C<sub>4</sub>H<sub>2</sub>F<sub>6</sub>O<sub>4</sub> (559.67 + 228.05).

**(R)-N<sup>α</sup>-Diphenylacetyl-N<sup>ω</sup>-(aminopropyl)aminocarbonyl(4-hydroxybenzyl)argininamide bis(hydrotrifluoroacetate) (42).**<sup>14</sup> (R)-N'-(4-*tert*-Butoxybenzyl)-N<sup>α</sup>-(2,2-diphenylacetyl)ornithinamide (**40**) (150 mg, 0.31 mmol) and N-*tert*-butoxycarbonyl-N'-[3(*tert*-butoxycarbonylamino)propyl]aminocarbonyl-S-methylisothiourea (**39**) (132 mg, 0.34 mmol) were dissolved in CH<sub>2</sub>Cl<sub>2</sub> (30 mL). HgCl<sub>2</sub> (126 mg, 0.46 mmol) and DIPEA (100 mg, 0.76 mmol) were added and the mixture was stirred at rt overnight to afford the crude product that was purified by column chromatography (eluent CH<sub>2</sub>Cl<sub>2</sub>/ethyl acetate 10:1 to 1:1). The purified product was dissolved in a mixture (10.5 mL) of CH<sub>2</sub>Cl<sub>2</sub>, TFA and water (1:1:0.1). Afterwards, CH<sub>2</sub>Cl<sub>2</sub> (20 mL) was added, the organic solvent evaporated (2x) at reduced pressure, and the crude product purified by HPLC (gradient: 0-35 min, A/B 85:15-38:62, *t*<sub>R</sub> = 19 min) to obtain **42** (112 mg, 0.14 mmol, 45%) as a white fluffy solid. <sup>1</sup>H NMR (600 MHz, DMSO-*d*<sub>6</sub>): δ (ppm) 1.36-1.50 (m, 2H), 1.50-1.60 (m, 1H), 1.63-1.79 (m, 3H), 2.77-2.88 (m, 2H), 3.14-3.26 (m, 4H), 4.10-4.21 (m, 2H), 4.29-4.38 (m, 1H), 5.13 (s, 1H), 6.64-6.71 (m, 2H), 6.98-7.03 (m, 2H), 7.18-7.24 (m, 2H), 7.26-7.34 (m, 8H), 7.67 (br s, 1H), 7.87 (br s, 3H), 8.37 (t, *J* 5.5 Hz, 1H), 8.41-8.61 (m, 3H), 9.03 (br s, 1H), 9.36 (br s, 1H), 10.78 (br s, 1H). <sup>13</sup>C NMR (151 MHz, DMSO-*d*<sub>6</sub>): δ (ppm) 24.6, 27.3, 29.4, 36.5, 36.7, 40.4, 41.7, 52.4, 56.0, 115.0, 117.0 (q, *J* 298.4 Hz) (TFA), 126.59, 126.62, 128.18, 128.22, 128.4, 128.52, 128.57, 129.2, 140.3, 140.5, 153.8, 154.1, 156.3, 159.2 (q, *J* 32.1 Hz) (TFA), 171.04, 171.08. HRMS (ESI): *m/z* [M+H]<sup>+</sup> calc. for [C<sub>31</sub>H<sub>40</sub>N<sub>7</sub>O<sub>4</sub>]<sup>+</sup> 574.3142, found 574.3142. C<sub>31</sub>H<sub>39</sub>N<sub>7</sub>O<sub>4</sub> × C<sub>4</sub>H<sub>2</sub>F<sub>6</sub>O<sub>4</sub> (573.70 + 228.05).

**(R)-N<sup>α</sup>-Diphenylacetyl-N<sup>ω</sup>-(acetyl aminoethyl)aminocarbonyl(4-hydroxybenzyl)argininamide hydrotrifluoroacetate (53).** Compound **53** was prepared using *General Procedure A*, the reactants **41** (34.6 mg, 43.9 μmol), succinimidyl acetate (**43**) (7.3 mg, 32.5 μmol), DIPEA (29 μL, 166 μmol) and the solvent DMF (300 μL). Purification by preparative HPLC (gradient: 0-35 min, A/B 85:15-45:55, *t*<sub>R</sub> = 20 min) afforded **53** (22.4 mg, 31.3 μmol, 71%) as a white fluffy solid. <sup>1</sup>H NMR (600 MHz, DMSO-*d*<sub>6</sub>): δ (ppm) 1.36-1.50 (m, 2H), 1.51-1.61 (m, 1H), 1.64-1.72 (m, 1H), 1.80 (s, 3H), 3.10-3.27 (m, 6H), 4.09-4.20 (m, 2H), 4.31-4.37 (m, 1H), 5.13 (s, 1H), 6.65-6.71 (m, 2H), 6.98-7.03 (m, 2H), 7.19-7.25 (m, 2H), 7.26-7.33 (m, 8H), 7.50-7.56 (m, 1H), 7.90-8.00 (m, 1H), 8.36 (t, *J* 5.8 Hz, 1H), 8.43 (br s, 2H, interfering with two surrounding signals), 8.49 (d, *J* 8.1 Hz, 1H), 8.96 (br s, 1H), 9.31 (br s, 1H), 10.25 (br s, 1H). <sup>13</sup>C NMR (151 MHz, DMSO-*d*<sub>6</sub>): δ (ppm) 22.6, 24.6, 29.4, 38.1, 39.1, 40.3, 41.6, 52.3, 55.9, 115.0, 115.7 (TFA), 117.6 (TFA), 126.57, 126.61, 128.17, 128.21, 128.42, 128.50, 128.53, 129.1, 140.3, 140.5, 153.6, 153.9, 156.3, 158.9 (q, *J* 33.2 Hz) (TFA), 169.6, 170.99,

171.03. RP-HPLC (Method A, 220 nm): 100% ( $t_R$  = 11.8 min,  $k$  = 3.5). HRMS (ESI):  $m/z$   $[M+H]^+$  calc. for  $[C_{32}H_{40}N_7O_5]^+$  602.3085, found 602.3092.  $C_{32}H_{39}N_7O_5 \times C_2HF_3O_2$  (601.71 + 114.02).

**(R)-N $\alpha$ -Diphenylacetyl-N $\omega$ -(acetylaminoethyl)aminocarbonyl(4-hydroxybenzyl)argininamide hydrotrifluoroacetate (54).** Compound **54** was prepared using *General Procedure A*, the reactants **42** (26.3 mg, 32.8  $\mu$ mol), succinimidyl acetate (**43**) (5.1 mg, 32  $\mu$ mol), DIPEA (22  $\mu$ L, 126  $\mu$ mol) and the solvent DMF (300  $\mu$ L). Purification by preparative HPLC (gradient: 0-35 min, A/B 85:15–45:55,  $t_R$  = 20 min) afforded **54** (15.7 mg, 18.6  $\mu$ mol, 57%) as a white fluffy solid.  $^1H$  NMR (600 MHz, DMSO- $d_6$ ):  $\delta$  (ppm) 1.36-1.50 (m, 2H), 1.52-1.60 (m, 3H), 1.64-1.72 (m, 1H), 1.80 (s, 3H), 3.03-3.08 (m, 2H), 3.08-3.13 (m, 2H), 3.16-3.24 (m, 2H), 4.10-4.20 (m, 2H), 4.31-4.37 (m, 1H), 5.13 (s, 1H), 6.66-6.69 (m, 2H), 6.98-7.02 (m, 2H), 7.19-7.25 (m, 2H), 7.26-7.31 (m, 8H), 7.49 (t,  $J$  5.1 Hz, 1H), 7.88 (t,  $J$  5.4 Hz, 1H), 8.36 (t,  $J$  5.8 Hz, 1H), 8.40 (br s, 2H, interfering with two surrounding signals), 8.49 (d,  $J$  8.0 Hz, 1H), 8.94 (br s, 1H), 9.30 (br s, 1H), 10.16 (br s, 1H).  $^{13}C$  NMR (151 MHz, DMSO- $d_6$ ):  $\delta$  (ppm) 22.6, 24.6, 29.2, 29.4, 36.0, 37.0, 40.3, 41.6, 52.3, 55.9, 115.0, 115.4 (TFA), 117.4 (TFA), 126.57, 126.60, 128.17, 128.20, 128.42, 128.50, 128.53, 129.1, 140.3, 140.5, 153.6, 153.7, 156.3, 158.7 (q,  $J$  34.0 Hz) (TFA), 169.3, 170.99, 171.03. RP-HPLC (Method A, 220 nm): 100% ( $t_R$  = 11.9 min,  $k$  = 3.6). HRMS (ESI):  $m/z$   $[M+H]^+$  calc. for  $[C_{33}H_{42}N_7O_5]^+$  616.3242 ;found 616.3250.  $C_{33}H_{41}N_7O_5 \times C_2HF_3O_2$  (615.74 + 114.02).

**(R)-N $\alpha$ -Diphenylacetyl-N $\omega$ -(propionylaminoethyl)aminocarbonyl(4-hydroxybenzyl)argininamide hydrotrifluoroacetate (55).** Compound **55** was prepared using *General Procedure A*, the reactants **42** (26.3 mg, 32.8  $\mu$ mol), succinimidyl propionate (**44**) (6.1 mg, 35.6  $\mu$ mol), DIPEA (22  $\mu$ L, 126  $\mu$ mol) and the solvent DMF (300  $\mu$ L). Purification by preparative HPLC (gradient: 0-35 min, A/B 85:10–45:55,  $t_R$  = 22 min) afforded **55** (17.5 mg, 23.5  $\mu$ mol, 72%) as a white fluffy solid.  $^1H$  NMR (600 MHz, DMSO- $d_6$ ):  $\delta$  (ppm) 0.99 (t, 3H,  $J$  7.6 Hz), 1.36-1.50 (m, 2H), 1.50-1.60 (m, 3H), 1.64-1.72 (m, 1H), 2.07 (q,  $J$  7.6 Hz, 2H), 3.04-3.13 (m, 4H), 3.16-3.23 (m, 2H), 4.10-4.20 (m, 2H), 4.31-4.37 (m, 1H), 5.13 (s, 1H), 6.66-6.70 (m, 2H), 6.99-7.02 (m, 2H), 7.19-7.25 (m, 2H), 7.26-7.31 (m, 8H), 7.50 (br s, 1H), 7.80 (t,  $J$  5.5 Hz, 1H), 8.36 (t,  $J$  5.8 Hz, 1H), 8.41 (br s, 2H, interfering with two surrounding signals), 8.49 (d,  $J$  8.1 Hz, 1H), 8.95 (br s, 1H), 9.31 (br s, 1H, interfering with previous signal), 10.21 (br s, 1H).  $^{13}C$  NMR (151 MHz, DMSO- $d_6$ ):  $\delta$  (ppm) 10.0, 24.6, 28.5, 29.28, 29.42, 35.9, 37.0, 40.3, 41.6, 52.3, 55.9, 115.0, 115.5 (TFA), 117.5 (TFA), 126.57, 126.60, 128.16, 128.20, 128.42, 128.50, 128.53, 129.1, 140.3, 140.5, 153.63, 153.71, 156.3, 158.8 (q,  $J$  33.6 Hz) (TFA), 170.99, 171.03, 170.07. RP-HPLC (Method A, 220 nm): 99% ( $t_R$  = 12.4 min,  $k$  = 3.8). HRMS (ESI):  $m/z$   $[M+H]^+$  calc. for  $[C_{34}H_{44}N_7O_5]^+$  630.3398, found 630.3403.  $C_{34}H_{43}N_7O_5 \times C_2HF_3O_2$  (629.76 + 114.02).

**(R)-N $\alpha$ -Diphenylacetyl-N $\omega$ -(2-fluoroacetylaminoethyl)aminocarbonyl(4-hydroxybenzyl)argininamide hydrotrifluoroacetate (56).** Compound **56** was prepared using *General Procedure C* and the reactants **41** (99.71 mg, 126.6  $\mu$ mol), 2-fluoroacetic acid (**46**) (28.99 mg, 371.5  $\mu$ mol), DIPEA (55  $\mu$ L, 315.7  $\mu$ mol), DCC (39.44 mg, 191.2  $\mu$ mol). Purification by preparative HPLC (gradient: 0-35 min, A/B 85:15–38:62,  $t_R$  = 21 min) afforded **56** (26.6 mg, 36.3  $\mu$ mol, 29%) as a white fluffy solid.  $^1H$  NMR (600 MHz, DMSO- $d_6$ ):  $\delta$  (ppm) 1.36-1.49 (m, 2H), 1.50-1.58 (m, 1H), 1.64-1.71 (m, 1H), 3.17-3.26 (m, 6H), 4.09-4.18 (m, 2H), 4.30-4.35 (m, 1H), 4.78 (d,  $J$  47.1 Hz, 2H), 5.12 (s, 1H), 6.65-6.68 (m, 2H), 6.98-7.01 (m, 2H), 7.18-7.24 (m, 2H), 7.27-7.30 (m, 8H), 7.56 (br s, 1H), 8.26 (t,  $J$  5.0 Hz, 1H), 8.35 (t,  $J$  5.8 Hz, 1H), 8.44 (br s, 2H, interfering with two surrounding signals), 8.48 (d,  $J$  8.1 Hz, 1H), 8.97 (br s, 1H), 9.31 (br s, 1H), 10.36 (br s, 1H).  $^{13}C$  NMR (150 MHz, DMSO- $d_6$ ):  $\delta$  (ppm) 24.6, 29.4, 37.8, 38.8, 40.4, 41.6, 52.3, 55.9, 80.0 (d,  $J$  180.4 Hz), 115.0, 116.0 (TFA), 118.0 (TFA), 126.58, 126.62, 128.17, 128.22, 128.43, 128.51, 128.54, 129.1, 140.3, 140.5, 153.7, 154.0, 156.3, 159.0 (q,  $J$  32.2 Hz) (TFA), 167.5 (d,  $J$  18.2 Hz), 171.01, 171.05. RP-HPLC (Method A, 220 nm): 98% ( $t_R$  = 12.6 min,  $k$  = 3.9). HRMS (ESI):  $m/z$   $[M+H]^+$  calc. for  $[C_{32}H_{39}FN_7O_5]^+$  620.2991, found 620.2999.  $C_{32}H_{38}FN_7O_5 \times C_2HF_3O_2$  (619.70 + 114.02).

**(R)-N $\alpha$ -Diphenylacetyl-N $\omega$ -(2,2-difluoroacetylaminoethyl)aminocarbonyl(4-hydroxybenzyl)argininamide hydrotrifluoroacetate (57).** Compound **57** was prepared using *General Procedure C* and the reactants **41** (66.4 mg, 84.3  $\mu$ mol), 2,2-difluoroacetic acid (**47**) (15  $\mu$ L, 238.4  $\mu$ mol), DIPEA (36  $\mu$ L, 206.7  $\mu$ mol), DCC (26.3 mg, 127.5  $\mu$ mol). Purification by preparative HPLC (gradient: 0-35 min, A/B 85:15–38:62,  $t_R$  = 21 min) afforded **57** (10.0 mg, 13.3  $\mu$ mol, 16%) as a white fluffy solid.  $^1H$  NMR (600 MHz, DMSO- $d_6$ ):  $\delta$  (ppm) 1.35-1.48 (m, 2H), 1.49-1.57 (m, 1H), 1.63-1.70 (m, 1H), 3.17-3.27 (m, 6H), 4.08-4.19 (m, 2H), 4.30-4.35 (m, 1H), 5.12 (s, 1H), 6.19 (t,  $J$  53.7 Hz, 1H), 6.64-6.69 (m, 2H), 6.97-7.00 (m, 2H), 7.18-7.24 (m, 2H), 7.25-7.31 (m, 8H), 7.58 (br s, 1H), 8.35 (t,  $J$  5.7 Hz, 1H), 8.44 (br s, 2H, interfering with two surrounding

signals), 8.48 (d, *J* 8.1 Hz, 1H), 8.86 (t, *J* 5.1 Hz, 1H), 8.94 (br s, 1H), 9.30 (br s, 1H), 10.23 (br s, 1H). <sup>13</sup>C NMR (150 MHz, DMSO-*d*<sub>6</sub>): δ (ppm) 24.6, 29.4, 38.2, 38.4, 40.3, 41.6, 52.3, 55.9, 108.5 (t, *J* 247.2 Hz), 115.0, 116.1 (TFA), 118.1 (TFA), 126.56, 126.60, 128.16, 128.20, 128.41, 128.49, 128.52, 129.1, 140.3, 140.5, 153.6, 153.9, 156.3, 158.6 (q, *J* 31.4 Hz) (TFA), 162.6 (t, *J* 25.1 Hz), 170.97, 171.02. RP-HPLC (Method A, 220 nm): 98% (*t*<sub>R</sub> = 12.8 min, *k* = 4.0). HRMS (ESI): *m/z* [M+H]<sup>+</sup> calc. for [C<sub>32</sub>H<sub>38</sub>F<sub>2</sub>N<sub>7</sub>O<sub>5</sub>]<sup>+</sup> 638.2902, found 638.2905. C<sub>32</sub>H<sub>37</sub>F<sub>2</sub>N<sub>7</sub>O<sub>5</sub> × C<sub>2</sub>HF<sub>3</sub>O<sub>2</sub> (637.69 + 114.02).

**(R)-N<sup>α</sup>-Diphenylacetyl-N<sup>ω</sup>-(trifluoroacetylaminoethyl)aminocarbonyl(4-hydroxybenzyl)argininamide hydrotrifluoroacetate (58).** Compound **58** was prepared using *General Procedure A*, the reactants **41** (30 mg, 38.1 μmol), succinimidyl trifluoroacetate (**34**) (20 mg, 88.3 μmol), DIPEA (20 μL, 114.8 μmol) and the solvent DMF (100 μL). Purification by preparative HPLC (gradient: 0-30 min, A/B 85:15–38:62, *t*<sub>R</sub> = 19) afforded **58** (6.24 mg, 8.1 μmol, 21%) as a white fluffy solid. <sup>1</sup>H NMR (600 MHz, DMSO-*d*<sub>6</sub>): δ (ppm) 1.36-1.49 (m, 2H), 1.50-1.58 (m, 1H), 1.63-1.71 (m, 1H), 3.17-3.23 (m, 2H), 3.24-3.28 (m, 2H), 3.29-3.32 (m, 2H), 4.08-4.21 (m, 2H), 4.30-4.37 (m, 1H), 5.12 (s, 1H), 6.66-6.69 (m, 2H), 6.98-7.02 (m, 2H), 7.20-7.25 (m, 2H), 7.27-7.30 (m, 8H), 7.61 (t, *J* 5.5 Hz, 1H), 8.36 (t, *J* 5.9 Hz, 1H), 8.44 (br s, 2H, interfering with two surrounding signals), 8.48 (d, *J* 8.1 Hz, 1H), 8.91 (br s, 1H), 9.30 (br s, 1H), 9.48 (t, *J* 5.2 Hz, 1H), 10.17 (br s, 1H). <sup>13</sup>C NMR (150 MHz, DMSO-*d*<sub>6</sub>): δ (ppm) 24.6, 29.4, 36.5, 38.1, 38.9, 40.4, 41.6, 52.3, 56.0, 114.96 (TFA), 115.03, 116.9 (TFA), 117.1 (q, *J* 298.6 Hz), 126.58, 126.61, 128.17, 128.21, 128.42, 128.51, 128.56, 129.1, 140.3, 140.5, 153.7, 154.2, 156.5, 156.8 (the last signals belong to a quartet that is not fully resolved), 158.8 (q, *J* 31.7 Hz) (TFA), 171.04, 171.07. RP-HPLC (Method A, 220 nm): 98% (*t*<sub>R</sub> = 13.6 min, *k* = 4.3). HRMS (ESI): *m/z* [M+H]<sup>+</sup> calc. for [C<sub>32</sub>H<sub>37</sub>F<sub>3</sub>N<sub>7</sub>O<sub>5</sub>]<sup>+</sup> 656.2803, found 656.2814. C<sub>32</sub>H<sub>36</sub>F<sub>3</sub>N<sub>7</sub>O<sub>5</sub> × C<sub>2</sub>HF<sub>3</sub>O<sub>2</sub> (655.68 + 114.02).

**(R)-N<sup>α</sup>-Diphenylacetyl-N<sup>ω</sup>-(2-chloroacetylaminoethyl)aminocarbonyl(4-hydroxybenzyl)argininamide hydrotrifluoroacetate (59).** Compound **59** was prepared using *General Procedure B* and the reactants **41** (106.74 mg, 135.5 μmol), 2-chloroacetic acid (**48**) (37.4 mg, 395.8 μmol), DCC (38 mg, 184.2 μmol). Purification by preparative HPLC (gradient: 0-30 min, A/B 85:15–38:62, *t*<sub>R</sub> = 18 min) afforded **59** (16.61 mg, 22.14 μmol, 16%) as a white fluffy solid. <sup>1</sup>H NMR (600 MHz, DMSO-*d*<sub>6</sub>): δ (ppm) 1.37-1.50 (m, 2H), 1.51-1.58 (m, 1H), 1.64-1.73 (m, 1H), 3.17-3.24 (m, 6H), 4.05 (s, 2H), 4.10-4.20 (m, 2H), 4.31-4.36 (m, 1H), 5.13 (s, 1H), 6.65-6.70 (m, 2H), 6.98-7.02 (m, 2H), 7.19-7.25 (m, 2H), 7.26-7.32 (m, 8H), 7.56 (br s, 1H), 8.31-8.35 (m, 1H), 8.36 (t, *J* 5.8 Hz, 1H), 8.45 (br s, 2H, interfering with two surrounding signals), 8.49 (d, *J* 8.1 Hz, 1H), 8.96 (br s, 1H), 9.31 (br s, 1H), 10.32 (br s, 1H). <sup>13</sup>C NMR (150 MHz, DMSO-*d*<sub>6</sub>): δ (ppm) 24.6, 29.4, 38.6, 38.7, 40.3, 41.6, 42.6, 52.3, 55.9, 115.01, 115.9 (TFA), 117.9 (TFA), 126.56, 126.61, 128.16, 128.21, 128.42, 128.50, 128.53, 129.13, 140.3, 140.5, 153.6, 153.9, 156.3, 158.8 (q, *J* 32.5 Hz) (TFA), 166.3, 170.98, 171.03. RP-HPLC (Method A, 220 nm): 100% (*t*<sub>R</sub> = 12.8 min, *k* = 4.0). HRMS (ESI): *m/z* [M+H]<sup>+</sup> calc. for [C<sub>32</sub>H<sub>39</sub>ClN<sub>7</sub>O<sub>5</sub>]<sup>+</sup> 636.2696, found 636.2699. C<sub>32</sub>H<sub>38</sub>ClN<sub>7</sub>O<sub>5</sub> × C<sub>2</sub>HF<sub>3</sub>O<sub>2</sub> (636.15 + 114.02).

**(R)-N<sup>α</sup>-Diphenylacetyl-N<sup>ω</sup>-(2-bromoacetylaminoethyl)aminocarbonyl(4-hydroxybenzyl)argininamide hydrotrifluoroacetate (60).** Compound **60** was prepared using *General Procedure B* and the reactants **41** (93.44 mg, 118.6 μmol), 2-bromoacetic acid (**49**) (37.5 mg, 269.9 μmol), DCC (31.1 mg, 150.7 μmol). Purification by preparative HPLC (gradient: 0-30 min, A/B 85:15–38:62, *t*<sub>R</sub> = 19 min) afforded **60** (15.40 mg, 19.4 μmol, 16%) as a white fluffy solid. <sup>1</sup>H NMR (600 MHz, DMSO-*d*<sub>6</sub>): δ (ppm) 1.37-1.50 (m, 2H), 1.51-1.58 (m, 1H), 1.64-1.73 (m, 1H), 3.17-3.24 (m, 6H), 3.85 (s, 2H), 4.10-4.20 (m, 2H), 4.31-4.36 (m, 1H), 5.13 (s, 1H), 6.65-6.70 (m, 2H), 6.98-7.02 (m, 2H), 7.19-7.25 (m, 2H), 7.26-7.32 (m, 8H), 7.56 (br s, 1H), 8.31-8.35 (m, 1H), 8.36 (t, *J* 5.8 Hz, 1H), 8.45 (br s, 2H, interfering with two surrounding signals), 8.49 (d, *J* 8.1 Hz, 1H), 8.97 (br s, 1H), 9.31 (br s, 1H), 10.32 (br s, 1H). <sup>13</sup>C NMR (150 MHz, DMSO-*d*<sub>6</sub>): δ (ppm) 24.6, 29.40, 29.44, 38.66, 38.73, 40.4, 41.6, 52.3, 55.9, 115.0, 126.56, 126.61, 128.16, 128.21, 128.42, 128.50, 128.52, 129.13, 140.3, 140.5, 153.6, 153.9, 156.3, 158.8 (q, *J* 32.9 Hz), 166.5, 170.97, 171.03. RP-HPLC (Method A, 220 nm): 99% (*t*<sub>R</sub> = 12.9 min, *k* = 4.0). HRMS (ESI): *m/z* [M+H]<sup>+</sup> calc. for [C<sub>32</sub>H<sub>39</sub>BrN<sub>7</sub>O<sub>5</sub>]<sup>+</sup> 680.2191, found 680.2193. C<sub>32</sub>H<sub>38</sub>BrN<sub>7</sub>O<sub>5</sub> × C<sub>2</sub>HF<sub>3</sub>O<sub>2</sub> (680.60 + 114.02).

**(R)-N<sup>α</sup>-Diphenylacetyl-N<sup>ω</sup>-(glycinyllaminoethyl)aminocarbonyl(4-hydroxybenzyl)argininamide bis(hydrotrifluoroacetate) (61).** Compound **61** was prepared using *General Procedure A*, the reactants **41** (41.4 mg, 52.6 μmol), succinimidyl N-Boc-glycinate (**25**) (17.6 mg, 64.6 μmol), DIPEA (35 μL, 200.9 μmol) and the solvent DMF (1 mL). Additionally, the crude product was poured into a solution of 100 mL water (5% acetonitrile, 0.5% TFA). After lyophilization, the crude product was dissolved in a mixture (2 mL) of CH<sub>2</sub>Cl<sub>2</sub>

and TFA (1:1) and stirred at rt for 2 h. The solvent was evaporated, and the crude product purified by preparative HPLC (gradient: 0-30 min, A/B 85:15–40:60,  $t_R$  = 15 min) which afforded **61** (20.5 mg, 24.4  $\mu$ mol, 46%) as a white fluffy solid.  $^1\text{H}$  NMR (600 MHz, DMSO- $d_6$ ):  $\delta$  (ppm) 1.36-1.50 (m, 2H), 1.51-1.58 (m, 1H), 1.64-1.72 (m, 1H), 3.17-3.26 (m, 6H), 3.53 (s, 2H), 4.09-4.19 (m, 2H), 4.31-4.36 (m, 1H), 5.13 (s, 1H), 6.66-6.70 (m, 2H), 6.98-7.02 (m, 2H), 7.19-7.25 (m, 2H), 7.26-7.31 (m, 8H), 7.64 (br s, 1H), 8.08 (br s, 3H), 8.36 (t,  $J$  5.7 Hz, 1H), 8.42-8.56 (m, 4H), 9.02 (br s, 1H), 9.34 (br s, 1H), 10.73 (br s, 1H).  $^{13}\text{C}$  NMR (150 MHz, DMSO- $d_6$ ):  $\delta$  (ppm) 24.6, 29.4, 38.3, 38.7, 40.0, 40.3, 41.6, 52.3, 55.9, 115.0, 116.1 (TFA), 118.0 (TFA), 126.58, 126.61, 128.17, 128.21, 128.41, 128.51, 128.54, 129.1, 140.3, 140.5, 153.7, 154.1, 156.3, 158.9 (q,  $J$  31.7 Hz) (TFA), 166.2, 171.01, 171.06. RP-HPLC (Method A, 220 nm): 96% ( $t_R$  = 10.9 min,  $k$  = 3.2). HRMS (ESI):  $m/z$   $[\text{M}+\text{H}]^+$  calc. for  $[\text{C}_{32}\text{H}_{41}\text{N}_8\text{O}_5]^+$  617.3194, found 617.3205.  $\text{C}_{32}\text{H}_{40}\text{N}_8\text{O}_5 \times \text{C}_4\text{H}_2\text{F}_6\text{O}_4$  (616.31 + 228.04).

**(R)-N $\alpha$ -Diphenylacetyl-N $\omega$ -(2-hydroxyacetylaminooethyl)aminocarbonyl(4-hydroxybenzyl)argininamide hydrotrifluoroacetate (62).** Under assay conditions, **60** is stable for 24 h. Degradation of compound **60** led to a 1:1 mixture of **60** and **62** after 6 months. Purification by preparative HPLC (gradient: 0-30 min, A/B 85:15–38:62,  $t_R$  = 15 min) afforded **62** as a white fluffy solid.  $^1\text{H}$  NMR (600 MHz, DMSO- $d_6$ ):  $\delta$  (ppm) 1.35-1.49 (m, 2H), 1.50-1.58 (m, 1H), 1.64-1.72 (m, 1H), 3.17-3.25 (m, 6H), 3.81 (s, 2H), 4.09-4.20 (m, 2H), 4.31-4.36 (m, 1H), 5.12 (s, 1H), 5.50 (br s, 1H), 6.50-6.70 (m, 2H), 6.98-7.02 (m, 2H), 7.20-7.25 (m, 2H), 7.26-7.30 (m, 8H), 7.52 (br s, 1H), 7.88 (t,  $J$  5.2 Hz, 1H), 8.36 (t,  $J$  5.8 Hz, 1H), 8.40 (br s, 2H, interfering with two surrounding signals), 8.48 (d,  $J$  8.1 Hz, 1H), 8.89 (br s, 1H), 9.29 (br s, 1H), 9.89 (br s, 1H).  $^{13}\text{C}$  NMR (150 MHz, DMSO- $d_6$ ):  $\delta$  (ppm) 24.6, 29.4, 37.7, 39.1, 40.3, 41.6, 52.3, 55.9, 61.4, 115.0, 126.57, 126.61, 128.16, 128.20, 128.41, 128.49, 128.50, 129.1, 140.3, 140.4, 153.5, 153.8, 156.3, 158.3 (q,  $J$  31.6 Hz) (TFA), 170.95, 171.00, 172.3. RP-HPLC (Method A, 220 nm): 96% ( $t_R$  = 11.5 min,  $k$  = 3.5). HRMS (ESI):  $m/z$   $[\text{M}+\text{H}]^+$  calc. for  $[\text{C}_{32}\text{H}_{40}\text{N}_7\text{O}_6]^+$  618.3035, found 618.3038.  $\text{C}_{32}\text{H}_{39}\text{N}_7\text{O}_5 \times \text{C}_2\text{HF}_3\text{O}_2$  (617.71 + 114.02).

**(R)-N $\alpha$ -Diphenylacetyl-N $\omega$ -(acrylaminoethyl)aminocarbonyl(4-hydroxybenzyl)argininamide hydrotrifluoroacetate (63).** Compound **63** was prepared using *General Procedure B* and the reactants **41** (97.33 mg, 123.5  $\mu$ mol), acrylic acid (**52**) (20  $\mu$ L, 291.4  $\mu$ mol), DCC (25 mg, 121.2  $\mu$ mol). Purification by preparative HPLC (gradient: 0-30 min, A/B 85:15–40:60,  $t_R$  = 18 min) afforded **63** (9.0 mg, 12.4  $\mu$ mol, 10%) as a white fluffy solid.  $^1\text{H}$  NMR (600 MHz, DMSO- $d_6$ ):  $\delta$  (ppm) 1.36-1.50 (m, 2H), 1.50-1.58 (m, 1H), 1.63-1.72 (m, 1H), 3.18-3.23 (m, 4H), 3.23-3.27 (m, 2H), 4.09-4.20 (m, 2H), 4.30-4.36 (m, 1H), 5.16 (s, 1H), 5.59 (dd,  $^2J$  2.1 Hz,  $^3J$  10.1 Hz, 1H), 6.08 (dd,  $^2J$  2.1 Hz,  $^3J$  17.1 Hz, 1H), 6.20 (dd,  $^2J$  10.1 Hz,  $^3J$  17.1 Hz, 1H), 6.65-6.70 (m, 2H), 6.98-7.03 (m, 2H), 7.19-7.25 (m, 2H), 7.26-7.32 (m, 8H), 7.56 (br s, 1H), 8.23 (t,  $J$  5.3 Hz, 1H), 8.36 (t,  $J$  5.8 Hz, 1H), 8.44 (br s, 2H, interfering with two surrounding signals), 8.49 (d,  $J$  8.1 Hz, 1H), 8.96 (br s, 1H), 9.31 (br s, 1H), 10.18 (br s, 1H).  $^{13}\text{C}$  NMR (150 MHz, DMSO- $d_6$ ):  $\delta$  (ppm) 24.6, 29.4, 38.1, 39.0, 40.3, 41.6, 52.3, 55.9, 115.0, 125.3, 126.56, 126.60, 128.16, 128.20, 128.41, 128.49, 128.52, 129.1, 131.6, 140.3, 140.5, 153.6, 153.9, 156.3, 158.4 (q,  $J$  32.1 Hz) (TFA), 165.0, 170.97, 171.02. RP-HPLC (Method A, 220 nm): 98% ( $t_R$  = 12.4 min,  $k$  = 3.8). HRMS (ESI):  $m/z$   $[\text{M}+\text{H}]^+$  calc. for  $[\text{C}_{33}\text{H}_{40}\text{N}_7\text{O}_5]^+$  614.3085, found 614.3089.  $\text{C}_{33}\text{H}_{39}\text{N}_7\text{O}_5 \times \text{C}_2\text{HF}_3\text{O}_2$  (613.72 + 114.02).

**(R)-N $\alpha$ -Diphenylacetyl-N $\omega$ -(3-chloropropanoylaminoethyl)aminocarbonyl(4-hydroxybenzyl)argininamide hydrotrifluoroacetate (64).** Compound **64** was prepared using *General Procedure B* and the reactants **41** (101.15 mg, 128.4  $\mu$ mol), 3-chloropropionic acid (**50**) (20.31 mg, 187.2  $\mu$ mol), DCC (33.02 mg, 160  $\mu$ mol). Purification by preparative HPLC (gradient: 0-35 min, A/B 85:15–38:62,  $t_R$  = 21 min) afforded **64** (9.16 mg, 12.0  $\mu$ mol, 9%) as a white fluffy solid.  $^1\text{H}$  NMR (600 MHz, DMSO- $d_6$ ):  $\delta$  (ppm) 1.36-1.50 (m, 2H), 1.51-1.59 (m, 1H), 1.64-1.72 (m, 1H), 2.56 (t,  $J$  6.4 Hz, 2H), 3.14-3.23 (m, 6H), 3.77 (t,  $J$  6.4 Hz, 2H), 4.09-4.20 (m, 2H), 4.31-4.37 (m, 1H), 5.13 (s, 1H), 6.65-6.70 (m, 2H), 6.98-7.02 (m, 2H), 7.19-7.26 (m, 2H), 7.26-7.32 (m, 8H), 7.51 (br s, 1H), 8.12 (br s, 1H), 8.36 (t,  $J$  5.8 Hz, 1H), 8.44 (br s, 2H, interfering with two surrounding signals), 8.49 (d,  $J$  8.1 Hz, 1H), 8.97 (br s, 1H), 9.32 (br s, 1H), 10.34 (br s, 1H).  $^{13}\text{C}$  NMR (150 MHz, DMSO- $d_6$ ):  $\delta$  (ppm) 24.6, 29.4, 38.1, 38.3, 39.1, 40.3, 40.9, 41.6, 52.3, 55.9, 115.0, 116.0 (TFA), 118.0 (TFA), 126.56, 126.60, 128.16, 128.20, 128.41, 128.49, 128.52, 129.13, 140.3, 140.5, 153.6, 153.9, 156.3, 158.7 (q,  $J$  31.6 Hz) (TFA), 169.2, 170.98, 171.03. RP-HPLC (Method A, 220 nm): 96% ( $t_R$  = 12.8 min,  $k$  = 4.0). HRMS (ESI):  $m/z$   $[\text{M}+\text{H}]^+$  calc. for  $[\text{C}_{33}\text{H}_{41}\text{ClN}_7\text{O}_5]^+$  650.2852, found 650.2854.  $\text{C}_{33}\text{H}_{40}\text{ClN}_7\text{O}_5 \times \text{C}_2\text{HF}_3\text{O}_2$  (650.18 + 114.02).

**(R)-N $\alpha$ -Diphenylacetyl-N $\omega$ -(3-bromopropanoylaminoethyl)aminocarbonyl(4-hydroxybenzyl)argininamide hydrotrifluoroacetate (65).** Compound **65** was prepared using *General Procedure B* and the reactants **41** (97.3 mg, 123.5  $\mu$ mol), 3-bromopropionic acid (**51**) (80 mg, 522.9  $\mu$ mol), DCC (30 mg, 145.4

μmol). Purification by preparative HPLC (gradient: 0-35 min, A/B 85:15–38:62,  $t_R$  = 21 min) afforded **65** (12.0 mg, 14.8 μmol, 12%) as a white fluffy solid.  $^1\text{H}$  NMR (600 MHz, DMSO- $d_6$ ):  $\delta$  (ppm) 1.35-1.49 (m, 2H), 1.49-1.57 (m, 1H), 1.63-1.71 (m, 1H), 2.67 (t,  $J$  6.5 Hz, 2H), 3.14-3.22 (m, 6H), 3.63 (t,  $J$  6.5 Hz, 2H), 4.09-4.20 (m, 2H), 4.31-4.36 (m, 1H), 5.13 (s, 1H), 6.66-6.69 (m, 2H), 6.99-7.02 (m, 2H), 7.20-7.25 (m, 2H), 7.26-7.31 (m, 8H), 7.48-7.52 (m, 1H), 8.10-8.13 (m, 1H), 8.36 (t,  $J$  5.8 Hz, 1H), 8.42 (br s, 2H, interfering with two surrounding signals), 8.48 (d,  $J$  8.48 Hz, 1H), 8.93 (br s, 1H), 9.30 (br s, 1H), 10.14 (br s, 1H).  $^{13}\text{C}$  NMR (150 MHz, DMSO- $d_6$ ):  $\delta$  (ppm) 24.6, 29.36, 29.40, 38.1, 38.5, 38.9, 40.3, 41.6, 52.3, 55.9, 115.0, 126.57, 126.60, 128.16, 128.20, 128.41, 128.49, 128.51, 129.1, 140.3, 140.5, 153.6, 153.8, 156.3, 158.6 (q,  $J$  33.4 Hz) (TFA), 169.5, 170.96, 171.02. RP-HPLC (Method A, 220 nm): 97% ( $t_R$  = 13.0 min,  $k$  = 4.1). HRMS (ESI):  $m/z$   $[\text{M}+\text{H}]^+$  calc. for  $[\text{C}_{32}\text{H}_{41}\text{BrN}_7\text{O}_5]^+$  694.2347, found 694.2355.  $\text{C}_{33}\text{H}_{40}\text{BrN}_7\text{O}_5 \times \text{C}_2\text{HF}_3\text{O}_2$  (694.63 + 114.02).

**(R)-N $^\alpha$ -Diphenylacetyl-N $^\omega$ -(2-methylpropionylaminoethyl)aminocarbonyl(4-hydroxybenzyl)argininamide hydrotrifluoroacetate (66).** Compound **66** was prepared using *General Procedure A*, the reactants **41** (30.98 mg, 39.3 μmol), succinimidyl 2-methylpropionate (**23**) (7.76 mg, 41.9 μmol), DIPEA (20 μL, 114.8 μmol) and the solvent DMF (100 μL). Purification by preparative HPLC (gradient: 0-30 min, A/B 85:15–38:62,  $t_R$  = 17 min) afforded **66** (24.54 mg, 33.0 μmol, 84%) as a white fluffy solid.  $^1\text{H}$  NMR (600 MHz, DMSO- $d_6$ ):  $\delta$  (ppm) 0.99 (d,  $J$  6.9 Hz, 6H), 1.36-1.50 (m, 2H), 1.51-1.58 (m, 1H), 1.64-1.72 (m, 1H), 2.32 (septet,  $J$  6.9 Hz, 1H), 3.12-3.18 (m, 4H), 3.18-3.23 (m, 2H), 4.10-4.20 (m, 2H), 4.31-4.36 (m, 1H), 5.13 (s, 1H), 6.66-6.70 (m, 2H), 6.99-7.02 (m, 2H), 7.19-7.25 (m, 2H), 7.26-7.30 (m, 8H), 7.49 (br s, 1H), 7.81-7.84 (m, 1H), 8.36 (t,  $J$  5.8 Hz, 1H), 8.44 (br s, 2H, interfering with two surrounding signals), 8.49 (d,  $J$  8.1 Hz, 1H), 8.97 (br s, 1H), 9.31 (br s, 1H), 10.33 (br s, 1H).  $^{13}\text{C}$  NMR (151 MHz, DMSO- $d_6$ ):  $\delta$  (ppm) 19.5, 24.6, 29.4, 34.1, 38.0, 39.1, 40.3, 41.6, 52.3, 55.9, 115.0, 115.7 (TFA), 117.7 (TFA), 126.56, 126.60, 128.16, 128.20, 128.41, 128.49, 128.52, 129.13, 140.3, 140.5, 153.6, 153.9, 156.3, 158.8 (q,  $J$  33.1 Hz) (TFA), 170.97, 171.03, 173.0. RP-HPLC (Method B, 220 nm): 99% ( $t_R$  = 15.8 min,  $k$  = 4.5). HRMS (ESI):  $m/z$   $[\text{M}+\text{H}]^+$  calc. for  $[\text{C}_{34}\text{H}_{44}\text{N}_7\text{O}_5]^+$  630.3398, found 630.3410.  $\text{C}_{34}\text{H}_{43}\text{N}_7\text{O}_5 \times \text{C}_2\text{HF}_3\text{O}_2$  (629.76 + 114.02).

**(R)-N $^\alpha$ -Diphenylacetyl-N $^\omega$ -(2,2-dimethylpropionylaminoethyl)aminocarbonyl(4-hydroxybenzyl)argininamide hydrotrifluoroacetate (67).** Compound **67** was prepared using *General Procedure A*, the reactants **41** (31.06 mg, 39.4 μmol), succinimidyl 2,2-dimethylpropionate (**24**) (14.09 mg, 70.7 μmol), DIPEA (20 μL, 114.8 μmol) and the solvent DMF (100 μL). Purification by preparative HPLC (gradient: 0-30 min, A/B 90:10–30:70,  $t_R$  = 19 min) afforded **67** (26.60 mg, 35.1 μmol, 89%) as a white fluffy solid.  $^1\text{H}$  NMR (600 MHz, DMSO- $d_6$ ):  $\delta$  (ppm) 1.08 (s, 9H), 1.36-1.50 (m, 2H), 1.50-1.59 (m, 1H), 1.63-1.72 (m, 1H), 3.13-3.23 (m, 6H), 4.09-4.20 (m, 2H), 4.31-4.37 (m, 1H), 5.13 (s, 1H), 6.65-6.70 (m, 2H), 6.98-7.02 (m, 2H), 7.19-7.25 (m, 2H), 7.26-7.32 (m, 8H), 7.47 (br s, 1H), 7.52-7.57 (m, 1H), 8.36 (t,  $J$  5.8 Hz, 1H), 8.43 (br s, 2H, interfering with two surrounding signals), 8.49 (d,  $J$  8.0 Hz, 1H), 8.97 (s, 1H), 9.31 (br s, 1H), 10.38 (s, 1H).  $^{13}\text{C}$  NMR (150 MHz, DMSO- $d_6$ ):  $\delta$  (ppm) 24.6, 27.4, 29.4, 38.0, 38.5, 39.01, 40.3, 41.6, 52.3, 55.9, 115.0, 115.7 (TFA), 117.7 (TFA), 126.57, 126.60, 128.16, 128.20, 128.41, 128.50, 128.53, 129.13, 140.3, 140.5, 153.7, 154.0, 156.3, 158.9 (q,  $J$  32.8 Hz) (TFA), 170.98, 171.03, 177.9. RP-HPLC (Method B, 220 nm): 99% ( $t_R$  = 17.5 min,  $k$  = 5.1). HRMS (ESI):  $m/z$   $[\text{M}+\text{H}]^+$  calc. for  $[\text{C}_{35}\text{H}_{46}\text{N}_7\text{O}_5]^+$  644.3555, found 644.3570.  $\text{C}_{35}\text{H}_{45}\text{N}_7\text{O}_5 \times \text{C}_2\text{HF}_3\text{O}_2$  (643.79 + 114.02).

**(R)-N $^\alpha$ -Diphenylacetyl-N $^\omega$ -(cyclopropoylaminoethyl)aminocarbonyl(4-hydroxybenzyl)argininamide hydrotrifluoroacetate (68).** Compound **68** was prepared using *General Procedure A*, the reactants **41** (30.81 mg, 39.1 μmol), succinimidyl cyclopropanecarboxylate (**29**) (11.13 mg, 60.8 μmol), DIPEA (20 μL, 114.8 μmol) and the solvent DMF (100 μL). Purification by preparative HPLC (gradient: 0-30 min, A/B 85:15–38:62,  $t_R$  = 17 min) afforded **68** (19.36 mg, 26.1 μmol, 67%) as a white fluffy solid.  $^1\text{H}$  NMR (600 MHz, DMSO- $d_6$ ):  $\delta$  (ppm) 0.61-0.69 (m, 4H), 1.38-1.57 (m, 4H), 1.63-1.71 (m, 1H), 3.14-3.23 (m, 6H), 4.09-4.20 (m, 2H), 4.31-4.36 (m, 1H), 5.13 (s, 1H), 6.66-6.69 (m, 2H), 6.99-7.01 (m, 2H), 7.20-7.25 (m, 2H), 7.27-7.30 (m, 8H), 7.54 (br s, 1H), 8.17 (s, 1H), 8.36 (t,  $J$  5.8 Hz, 1H), 8.44 (br s, 2H, interfering with two surrounding signals), 8.49 (d,  $J$  8.1 Hz, 1H), 8.97 (s, 1H), 9.31 (s, 1H), 10.20 (s, 1H).  $^{13}\text{C}$  NMR (151 MHz, DMSO- $d_6$ ):  $\delta$  (ppm) 6.3, 13.6, 24.6, 29.4, 38.2, 39.3, 40.3, 41.6, 52.3, 55.9, 115.0, 116.1 (TFA), 118.1 (TFA), 126.56, 126.60, 128.16, 128.20, 128.41, 128.49, 128.52, 129.1, 140.3, 140.5, 153.6, 153.9, 156.3, 158.6 (q,  $J$  32.7 Hz) (TFA), 170.97, 171.02, 173.0. RP-HPLC (Method B, 220 nm): 99% ( $t_R$  = 17.0 min,  $k$  = 4.9). HRMS (ESI):  $m/z$   $[\text{M}+\text{H}]^+$  calc. for  $[\text{C}_{34}\text{H}_{42}\text{N}_7\text{O}_5]^+$  628.3244, found 628.3255.  $\text{C}_{34}\text{H}_{41}\text{N}_7\text{O}_5 \times \text{C}_2\text{HF}_3\text{O}_2$  (627.75 + 114.02).

**(R)-N $\alpha$ -Diphenylacetyl-N $\omega$ -(cyclobutoylaminoethyl)aminocarbonyl(4-hydroxybenzyl)argininamide hydrotrifluoroacetate (69).** Compound **69** was prepared using *General Procedure A*, the reactants **41** (30.27 mg, 38.4  $\mu$ mol), succinimidyl cyclobutanecarboxylate (**30**) (11.46 mg, 63.1  $\mu$ mol), DIPEA (20  $\mu$ L, 114.8  $\mu$ mol) and the solvent DMF (100  $\mu$ L). Purification by preparative HPLC (gradient: 0-30 min, A/B 85:15-38:62,  $t_R$  = 18 min) afforded **69** (20.90 mg, 27.7  $\mu$ mol, 72%) as a white fluffy solid.  $^1\text{H}$  NMR (600 MHz, DMSO- $d_6$ ):  $\delta$  (ppm) 1.35-1.50 (m, 2H), 1.50-1.58 (m, 1H), 1.64-1.77 (m, 2H), 1.82-1.90 (m, 1H), 1.96-2.02 (m, 2H), 2.07-2.15 (m, 2H), 2.96 (q,  $J$  8.5 Hz, 1H), 3.12-3.17 (m, 4H), 3.18-3.23 (m, 2H), 4.10-4.20 (m, 2H), 4.31-4.36 (m, 1H), 1.53 (s, 1H), 6.66-6.69 (m, 2H), 6.99-7.02 (m, 2H), 7.20-7.25 (m, 2H), 7.27-7.30 (m, 8H), 7.51 (br s, 1H), 7.74 (br s, 1H), 8.36 (t,  $J$  5.8 Hz, 1H), 8.43 (br s, 2H, interfering with two surrounding signals), 8.49 (d,  $J$  8.1 Hz, 1H), 8.96 (br s, 1H), 9.31 (br s, 1H), 10.24 (br s, 1H).  $^{13}\text{C}$  NMR (151 MHz, DMSO- $d_6$ ):  $\delta$  (ppm) 17.7, 24.7, 29.4, 36.5, 38.1, 38.7, 39.1, 40.3, 41.6, 52.3, 55.9, 115.0, 115.6 (TFA), 117.6 (TFA), 126.56, 126.60, 128.16, 128.20, 128.41, 128.49, 128.52, 129.13, 140.3, 140.5, 153.6, 153.9, 156.3, 158.7 (q,  $J$  33.6 Hz) (TFA), 170.97, 171.02, 174.3. RP-HPLC (Method B, 220 nm): 96% ( $t_R$  = 16.4 min,  $k$  = 4.7). HRMS (ESI):  $m/z$   $[\text{M}+\text{H}]^+$  calc. for  $[\text{C}_{35}\text{H}_{44}\text{N}_7\text{O}_5]^+$  642.3398, found 642.3406.  $\text{C}_{35}\text{H}_{43}\text{N}_7\text{O}_5 \times \text{C}_2\text{HF}_3\text{O}_2$  (641.77 + 114.02).

**(R)-N $\alpha$ -Diphenylacetyl-N $\omega$ -(cyclopentoylaminoethyl)aminocarbonyl(4-hydroxybenzyl)argininamide hydrotrifluoroacetate (70).** Compound **70** was prepared using *General Procedure A*, the reactants **41** (30.82 mg, 39.1  $\mu$ mol), succinimidyl cyclopentanecarboxylate (**31**) (10.13 mg, 48.0  $\mu$ mol), DIPEA (20  $\mu$ L, 114.8  $\mu$ mol) and the solvent DMF (100  $\mu$ L). Purification by preparative HPLC (gradient: 0-30 min, A/B 85:15-38:62,  $t_R$  = 19 min) afforded **70** (15.90 mg, 20.7  $\mu$ mol, 53%) as a white fluffy solid.  $^1\text{H}$  NMR (600 MHz, DMSO- $d_6$ ):  $\delta$  (ppm) 1.35-1.64 (m, 10H), 1.65-1.75 (m, 3H), 3.13 (m, 4H), 3.18-3.23 (m, 2H), 4.09-4.19 (m, 2H), 4.31 (m, 1H), 5.13 (s, 1H), 6.65-6.70 (m, 2H), 6.98-7.02 (m, 2H), 7.20-7.25 (m, 2H), 7.26-7.31 (m, 8H), 7.50 (br s, 1H), 7.86 (br s, 1H), 8.36 (t,  $J$  5.8 Hz, 1H), 8.44 (br s, 2H, interfering with two surrounding signals), 8.49 (d,  $J$  8.1 Hz, 1H), 8.96 (br s, 1H), 9.32 (br s, 1H), 10.27 (br s, 1H).  $^{13}\text{C}$  NMR (151 MHz, DMSO- $d_6$ ):  $\delta$  (ppm) 24.6, 25.6, 29.4, 29.9, 38.1, 39.1, 40.3, 41.6, 44.3, 52.3, 55.9, 115.0, 115.7 (TFA), 117.6 (TFA), 126.56, 126.60, 128.15, 128.20, 128.41, 128.49, 128.52, 129.13, 140.3, 140.5, 153.6, 153.9, 156.3, 158.6 (q,  $J$  33.2 Hz) (TFA), 170.97, 171.02, 175.7. RP-HPLC (Method B, 220 nm): 99% ( $t_R$  = 17.0 min,  $k$  = 4.9). HRMS (ESI):  $m/z$   $[\text{M}+\text{H}]^+$  calc. for  $[\text{C}_{36}\text{H}_{46}\text{N}_7\text{O}_5]^+$  656.3555, found 656.3571.  $\text{C}_{36}\text{H}_{45}\text{N}_7\text{O}_5 \times \text{C}_2\text{HF}_3\text{O}_2$  (655.80 + 114.02).

**(R)-N $\alpha$ -Diphenylacetyl-N $\omega$ -(cyclohexoylaminoethyl)aminocarbonyl(4-hydroxybenzyl)argininamide hydrotrifluoroacetate (71).** Compound **71** was prepared using *General Procedure A*, the reactants **41** (29.0 mg, 36.8  $\mu$ mol), succinimidyl cyclohexanecarboxylate (**32**) (11.3 mg, 54.0  $\mu$ mol), DIPEA (20  $\mu$ L, 114.8  $\mu$ mol) and the solvent DMF (100  $\mu$ L). Purification by preparative HPLC (gradient: 0-30 min, A/B 85:15-38:62,  $t_R$  = 20.0 min) afforded **71** (17.45 mg, 22.3  $\mu$ mol, 60.6%) as a white fluffy solid.  $^1\text{H}$  NMR (600 MHz, DMSO- $d_6$ ):  $\delta$  (ppm) 1.10-1.22 (m, 3H), 1.26-1.35 (m, 2H), 1.36-1.50 (m, 2H), 1.51-1.62 (m, 2H), 1.64-1.71 (m, 5H), 2.02-2.08 (m, 1H), 3.11-3.17 (m, 4H), 3.18-3.23 (m, 2H), 4.10-4.19 (m, 2H), 4.31-4.36 (m, 1H), 5.13 (s, 1H), 6.66-6.69 (m, 2H), 6.99-7.02 (m, 2H), 7.19-7.25 (m, 2H), 7.26-7.31 (m, 8H), 7.47 (br s, 1H), 7.75-7.80 (m, 1H), 8.36 (t,  $J$  5.8 Hz, 1H), 8.43 (br s, 2H, interfering with two surrounding signals), 8.49 (d,  $J$  8.1 Hz, 1H), 8.95 (br s, 1H), 9.31 (br s, 1H), 10.25 (br s, 1H).  $^{13}\text{C}$  NMR (150 MHz, DMSO- $d_6$ ):  $\delta$  (ppm) 24.6, 25.3, 25.5, 29.2, 29.4, 37.9, 39.3, 40.3, 41.6, 44.1, 52.3, 55.9, 115.0, 115.6 (TFA), 117.6 (TFA), 126.57, 126.60, 128.16, 128.20, 128.41, 128.49, 128.52, 129.1, 140.3, 140.5, 153.6, 153.9, 156.3, 158.7 (q,  $J$  32.4 Hz) (TFA), 170.97, 171.02, 175.6. RP-HPLC (Method B, 220 nm): 99% ( $t_R$  = 18.0 min,  $k$  = 5.2). HRMS (ESI):  $m/z$   $[\text{M}+\text{H}]^+$  calc. for  $[\text{C}_{37}\text{H}_{48}\text{N}_7\text{O}_5]^+$  670.3711, found 670.3722.  $\text{C}_{37}\text{H}_{47}\text{N}_7\text{O}_5 \times \text{C}_2\text{HF}_3\text{O}_2$  (669.83 + 114.02).

**(R)-N $\alpha$ -Diphenylacetyl-N $\omega$ -(cyclohexylacetyl)aminoethyl)aminocarbonyl(4-hydroxybenzyl)argininamide hydrotrifluoroacetate (72).** Compound **72** was prepared using *General Procedure A*, the reactants **41** (30.6 mg, 38.8  $\mu$ mol), succinimidyl cyclohexylacetate (**33**) (12.7 mg, 56.9  $\mu$ mol), DIPEA (20  $\mu$ L, 114.8  $\mu$ mol) and the solvent DMF (100  $\mu$ L). Purification by preparative HPLC (gradient: 0-30 min, A/B 85:15-38:62,  $t_R$  = 21 min) afforded **72** (15.8 mg, 19.8  $\mu$ mol, 51%) as a white fluffy solid.  $^1\text{H}$  NMR (600 MHz, DMSO- $d_6$ ):  $\delta$  (ppm) 0.82-0.92 (m, 2H), 1.06-1.21 (m, 3H), 1.37-1.50 (m, 2H), 1.50-1.74 (m, 8H), 1.93 (d,  $J$  6.9 Hz, 2H), 3.15 (br s, 4H), 3.18-3.22 (m, 2H), 4.09-4.20 (m, 2H), 4.31-4.36 (m, 1H), 5.13 (s, 1H), 6.65-6.70 (m, 2H), 6.97-7.03 (m, 2H), 7.19-7.25 (m, 2H), 7.26-7.31 (m, 8H), 7.48 (br s, 1H), 7.87 (br s, 1H), 8.36 (t,  $J$  5.8 Hz, 1H), 8.44 (br s, 2H, interfering with two surrounding signals), 8.49 (d,  $J$  8.1 Hz, 1H), 8.96 (br s, 1H), 9.31 (br s, 1H), 10.25 (s, 1H).  $^{13}\text{C}$  NMR (151 MHz, DMSO- $d_6$ ):  $\delta$  (ppm) 24.6, 25.6, 25.8, 29.4, 32.5, 34.6, 37.9, 39.3, 40.3, 41.6, 43.4, 52.3, 55.9, 115.0, 126.56, 126.59, 128.15, 128.19, 128.40, 128.49, 128.52, 129.1, 140.3, 140.5, 153.6, 153.9, 156.3, 158.7

(q,  $J$  34.5 Hz) (TFA), 170.96, 171.02, 171.7. RP-HPLC (Method B, 220 nm): 100% ( $t_R$  = 16.0 min,  $k$  = 4.6). HRMS (ESI):  $m/z$   $[M+H]^+$  calc. for  $[C_{38}H_{50}N_7O_5]^+$  684.3868, found 684.3887.  $C_{38}H_{49}N_7O_5 \times C_2HF_3O_2$  (683.85 + 114.02).

**(R)-N $\alpha$ -Diphenylacetyl-N $\omega$ -(benzoylaminoethyl)aminocarbonyl(4-hydroxybenzyl)argininamide hydrotrifluoroacetate (73).** Compound **73** was prepared using *General Procedure A*, the reactants **41** (30.74 mg, 39.0  $\mu$ mol), succinimidyl benzoate (**26**) (13 mg, 59.3  $\mu$ mol), DIPEA (20  $\mu$ L, 114.8  $\mu$ mol) and the solvent DMF (100  $\mu$ L). Purification by preparative HPLC (gradient: 0-30 min, A/B 85:15-40:60,  $t_R$  = 21 min) afforded **73** (12.0 mg, 15.4  $\mu$ mol, 39%) as a white fluffy solid.  $^1H$  NMR (600 MHz, DMSO- $d_6$ ):  $\delta$  (ppm) 1.36-1.50 (m, 2H), 1.51-1.59 (m, 1H), 1.64-1.73 (m, 1H), 3.17-3.24 (m, 2H), 3.28-3.33 (m, 2H), 3.34-3.42 (m, 2H, overlaid with water), 4.09-4.20 (m, 2H), 4.31-4.36 (m, 1H), 5.13 (s, 1H), 6.65-6.70 (m, 2H), 6.98-7.03 (m, 2H), 7.19-7.25 (m, 2H), 7.26-7.31 (m, 8H), 7.43-7.48 (m, 2H), 7.50-7.55 (m, 1H), 7.58-7.64 (m, 1H), 7.82-7.87 (m, 2H), 8.36 (t,  $J$  5.7 Hz, 1H), 8.44 (br s, 2H, interfering with two surrounding signals), 8.49 (d,  $J$  8.0 Hz, 1H), 8.56 (t,  $J$  5.5 Hz, 1H), 8.96 (br s, 1H), 9.32 (br s, 1H), 10.24 (br s, 1H).  $^{13}C$  NMR (150 MHz, DMSO- $d_6$ ):  $\delta$  (ppm) 24.6, 29.4, 38.8, 39.0, 40.3, 41.6, 52.3, 55.9, 115.0, 126.56, 126.60, 127.20, 128.16, 128.20, 128.24, 128.41, 128.49, 128.52, 129.1, 131.2, 134.4, 140.3, 140.5, 153.6, 153.9, 156.3, 158.8 (q,  $J$  31.5 Hz) (TFA), 166.6, 170.98, 171.03. RP-HPLC (Method A, 220 nm): 99% ( $t_R$  = 13.7 min,  $k$  = 4.3). HRMS (ESI):  $m/z$   $[M+H]^+$  calc. for  $[C_{37}H_{42}N_7O_5]^+$  664.3242, found 664.3250.  $C_{37}H_{41}N_7O_5 \times C_2HF_3O_2$  (663.78 + 114.02).

**(R)-N $\alpha$ -Diphenylacetyl-N $\omega$ -(4-fluorobenzoylaminoethyl)aminocarbonyl(4-hydroxybenzyl)argininamide hydrotrifluoroacetate (74).** Compound **74** was prepared using *General Procedure A*, the reactants **41** (30.95 mg, 39.3  $\mu$ mol), succinimidyl 4-fluorobenzoate (**45**) (10.21 mg, 23.4  $\mu$ mol), DIPEA (20  $\mu$ L, 114.8  $\mu$ mol) and the solvent DMF (100  $\mu$ L). Purification by preparative HPLC (gradient: 0-30 min, A/B 80:20-50:50,  $t_R$  = 20 min) afforded **74** (13.8 mg, 17.3  $\mu$ mol, 44%) as a white fluffy solid.  $^1H$  NMR (600 MHz, DMSO- $d_6$ ):  $\delta$  (ppm) 1.36-1.49 (m, 2H), 1.51-1.58 (m, 1H), 1.64-1.72 (m, 1H), 3.17-3.23 (m, 2H), 3.27-3.32 (m, 2H), 3.35-3.40 (m, 2H), 4.09-4.20 (m, 2H), 4.31-4.36 (m, 1H), 5.13 (s, 1H), 6.66-6.69 (m, 2H), 6.99-7.01 (m, 2H), 7.19-7.25 (m, 2H), 7.26-7.30 (m, 10H), 7.30-7.31 (m, 1H), 7.64 (br s, 1H), 7.89-7.93 (m, 2H), 8.36 (t,  $J$  5.8 Hz, 1H), 8.44 (br s, 2H, interfering with two surrounding signals), 8.49 (d,  $J$  8.1 Hz, 1H), 8.60 (t,  $J$  5.5 Hz, 1H), 8.96 (br s, 1H), 9.31 (br s, 1H).  $^{13}C$  NMR (150 MHz, DMSO- $d_6$ ):  $\delta$  (ppm) 24.6, 29.4, 38.8, 39.0, 40.3, 41.6, 52.3, 55.9, 115.0, 115.14 (d,  $J$  21.7 Hz), 126.55, 126.59, 128.14, 128.19, 128.40, 128.48, 128.51, 129.1, 129.8 (d,  $J$  9.0 Hz), 130.9 (d,  $J$  3.0 Hz), 140.3, 140.4, 153.6, 153.9, 156.3, 158.4 (q,  $J$  30.7 Hz) (TFA), 163.8 (d,  $J$  248.3 Hz), 165.5, 170.97, 171.01. RP-HPLC (Method C, 220 nm): 98% ( $t_R$  = 22.9 min,  $k$  = 6.9). HRMS (ESI):  $m/z$   $[M+H]^+$  calc. for  $[C_{37}H_{41}FN_7O_5]^+$  682.3148, found 682.3157.  $C_{37}H_{40}FN_7O_5 \times C_2HF_3O_2$  (681.77 + 114.02).

**(R)-N $\alpha$ -Diphenylacetyl-N $\omega$ -(phenylacetyl aminoethyl)aminocarbonyl(4-hydroxybenzyl)argininamide hydrotrifluoroacetate (75).** Compound **75** was prepared using *General Procedure A*, the reactants **41** (30.18 mg, 38.3  $\mu$ mol), succinimidyl phenylacetate (**27**) (10.39 mg, 44.6  $\mu$ mol), DIPEA (20  $\mu$ L, 114.8  $\mu$ mol) and the solvent DMF (100  $\mu$ L). Purification by preparative HPLC (gradient: 0-30 min, A/B 85:15-38:62,  $t_R$  = 19 min) afforded **75** (19.64 mg, 24.8  $\mu$ mol, 65%) as a white fluffy solid.  $^1H$  NMR (600 MHz, DMSO- $d_6$ ):  $\delta$  (ppm) 1.36-1.51 (m, 2H), 1.51-1.59 (m, 1H), 1.64-1.73 (m, 1H), 3.14-3.24 (m, 6H), 3.40 (s, 2H), 4.09-4.20 (m, 2H), 4.30-4.38 (m, 1H), 5.13 (s, 1H), 6.66-6.69 (m, 2H), 6.98-7.02 (m, 2H), 7.19-7.31 (m, 15H), 7.53 (br s, 1H), 8.15 (br s, 1H), 8.36 (t,  $J$  5.7 Hz, 1H), 8.44 (br s, 2H, interfering with two surrounding signals), 8.49 (d,  $J$  8.0 Hz, 1H), 8.95 (br s, 1H), 9.31 (br s, 1H), 10.27 (br s, 1H).  $^{13}C$  NMR (151 MHz, DMSO- $d_6$ ):  $\delta$  (ppm) 24.6, 29.4, 38.2, 39.1, 40.3, 41.6, 42.4, 52.3, 55.9, 115.0, 115.8 (TFA), 117.8 (TFA), 126.3, 126.57, 126.60, 128.16, 128.20, 128.41, 128.50, 128.52, 128.99 (two carbon signals), 129.13, 136.3, 140.3, 140.5, 153.6, 153.9, 156.3, 158.7 (q,  $J$  33.6 Hz) (TFA), 170.5, 170.98, 171.03. RP-HPLC (Method B, 220 nm): 99% ( $t_R$  = 17.0 min,  $k$  = 4.9). HRMS (ESI):  $m/z$   $[M+H]^+$  calc. for  $[C_{38}H_{44}N_7O_5]^+$  678.3398, found 678.3414.  $C_{38}H_{43}N_7O_5 \times C_2HF_3O_2$  (677.81 + 114.02).

**(R)-N $\alpha$ -Diphenylacetyl-N $\omega$ -(diphenylacetyl aminoethyl)aminocarbonyl(4-hydroxybenzyl)argininamide hydrotrifluoroacetate (76).** Compound **76** was prepared using *General Procedure A*, the reactants **41** (35.81 mg, 45.5  $\mu$ mol), succinimidyl diphenylacetate (**28**) (26 mg, 84.1  $\mu$ mol), DIPEA (25  $\mu$ L, 143.5  $\mu$ mol) and the solvent DMF (100  $\mu$ L). Purification by preparative HPLC (gradient: 0-30 min, A/B 85:15-38:62,  $t_R$  = 16 min) afforded **76** (15 mg, 17.3  $\mu$ mol, 38%) as a white fluffy solid.  $^1H$  NMR (600 MHz, DMSO- $d_6$ ):  $\delta$  (ppm) 1.37-1.48 (m, 2H), 1.50-1.58 (m, 1H), 1.64-1.73 (m, 1H), 3.14-3.24 (m, 6H), 4.07-4.20 (m, 2H), 4.29-4.37 (m, 1H), 4.90 (s, 1H), 5.12 (s, 1H), 6.65-6.68 (m, 2H), 6.98-7.01 (m, 2H), 7.18-7.24 (m, 4H), 7.26-7.29 (m, 16H),

7.49 (br s, 1H), 8.34-8.38 (m, 2H), 8.42 (br s, 2H, interfering with two surrounding signals), 8.49 (d, *J* 8.1 Hz, 1H), 8.92 (br s, 1H), 9.30 (br s, 1H), 10.18 (br s, 1H). <sup>13</sup>C NMR (150 MHz, DMSO-*d*<sub>6</sub>): δ (ppm) 24.6, 29.4, 38.3, 39.0, 40.4, 41.6, 52.3, 55.9, 56.6, 115.0, 116.1 (TFA), 118.1 (TFA), 126.55, 126.58 (two carbon signals), 128.14, 128.17, 128.18, 128.27, 128.34, 128.39 (2 carb.), 128.46, 128.47, 128.49, 129.11, 140.3 (2 carb.), 140.4, 153.6, 153.9, 156.3, 158.6 (q, *J* 30.5 Hz) (TFA), 170.95, 171.01, 171.37. one aromatic carbon was not resolved. RP-HPLC (Method B, 220 nm): 98% (*t*<sub>R</sub> = 19.6 min, *k* = 5.8). HRMS (ESI): *m/z* [M+H]<sup>+</sup> calc. for [C<sub>44</sub>H<sub>48</sub>N<sub>7</sub>O<sub>5</sub>]<sup>+</sup> 754.3711, found 754.3715. C<sub>44</sub>H<sub>47</sub>N<sub>7</sub>O<sub>5</sub> × C<sub>2</sub>HF<sub>3</sub>O<sub>2</sub> (753.90 + 114.02).

**(R)-N<sup>α</sup>-Diphenylacetyl-N<sup>ω</sup>-(4-((1E,3E)-4-(4-(dimethylamino)phenyl)buta-1,3-dienyl)-2,6-dimethylpyridinioethyl)aminocarbonyl(4-hydroxybenzyl)argininamide hydrotrifluoroacetate trifluoroacetate (78).** DIPEA (2.80 μL, 16 μmol) was added to a solution of compound **41** (3.19 mg, 4.04 μmol) in DMF (50 μL). After 5 min, the fluorescent dye Py-5 (**77**) (5.74 mg, 15.6 μmol) was added, and the reaction mixture was shaken for 3 h in the dark. Purification by preparative HPLC (gradient: 0-30 min, A/B 85:15-38:62, *t*<sub>R</sub> = 20 min) afforded **78** (0.94 mg, 0.90 μmol, 22%) as a red solid. RP-HPLC (Method A, 220 nm): 95% (*t*<sub>R</sub> = 14.0 min, *k* = 4.4). HRMS (ESI): *m/z* [M+H]<sup>+</sup> calc. for [C<sub>44</sub>H<sub>48</sub>N<sub>7</sub>O<sub>5</sub>]<sup>+</sup> 821.4497, found 821.4509. C<sub>49</sub>H<sub>57</sub>N<sub>8</sub>O<sub>4</sub><sup>+</sup> × C<sub>2</sub>HF<sub>3</sub>O<sub>2</sub> × C<sub>2</sub>F<sub>3</sub>O<sub>2</sub><sup>-</sup> (822.05 + 114.02 + 113.02).

#### 4. $^1\text{H}$ -NMR und $^{13}\text{C}$ -NMR Spectra of Compounds 53-76

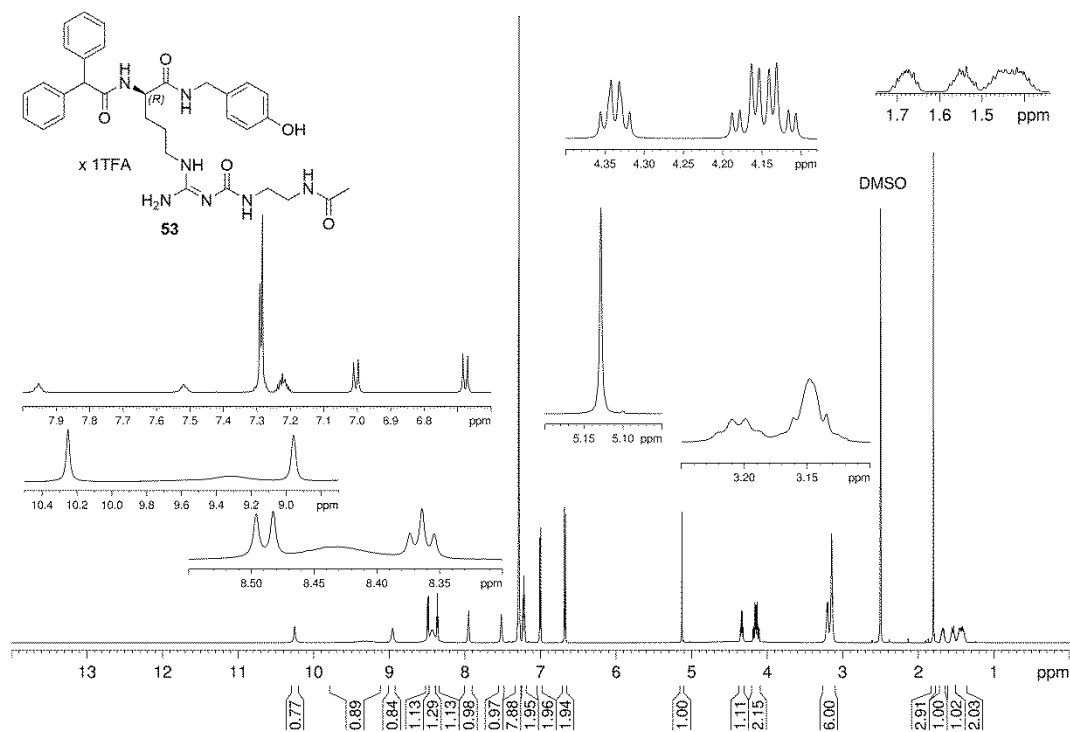

$^1\text{H}$ -NMR of compound 53

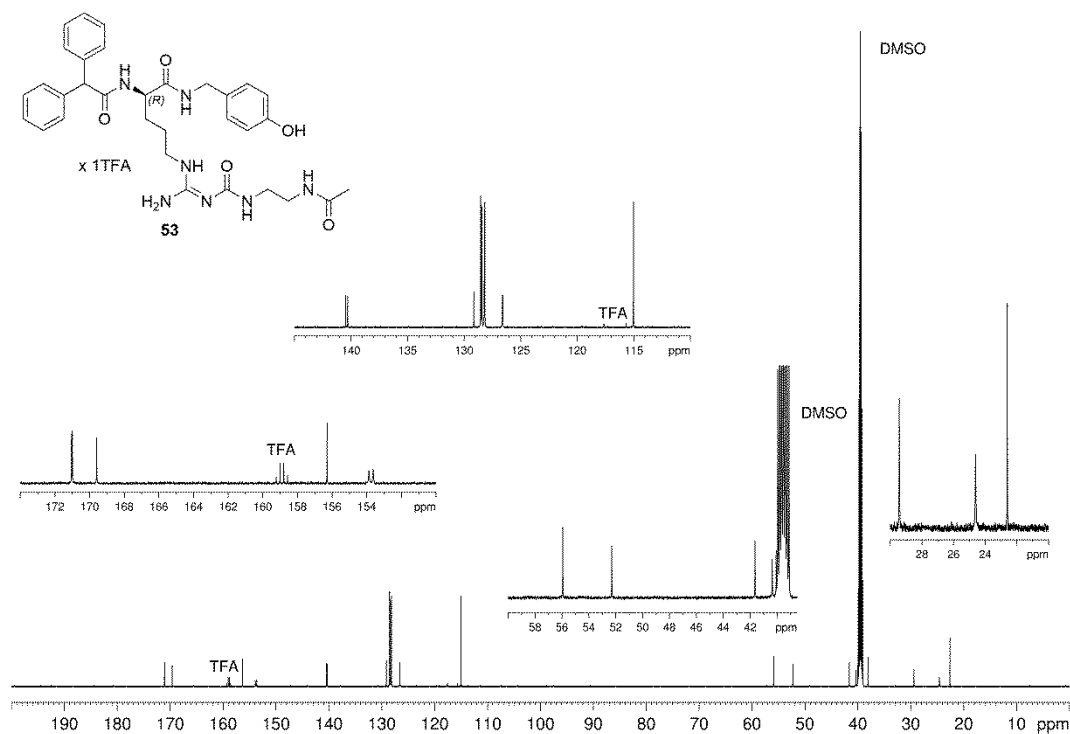

$^{13}\text{C}$ -NMR of compound 53

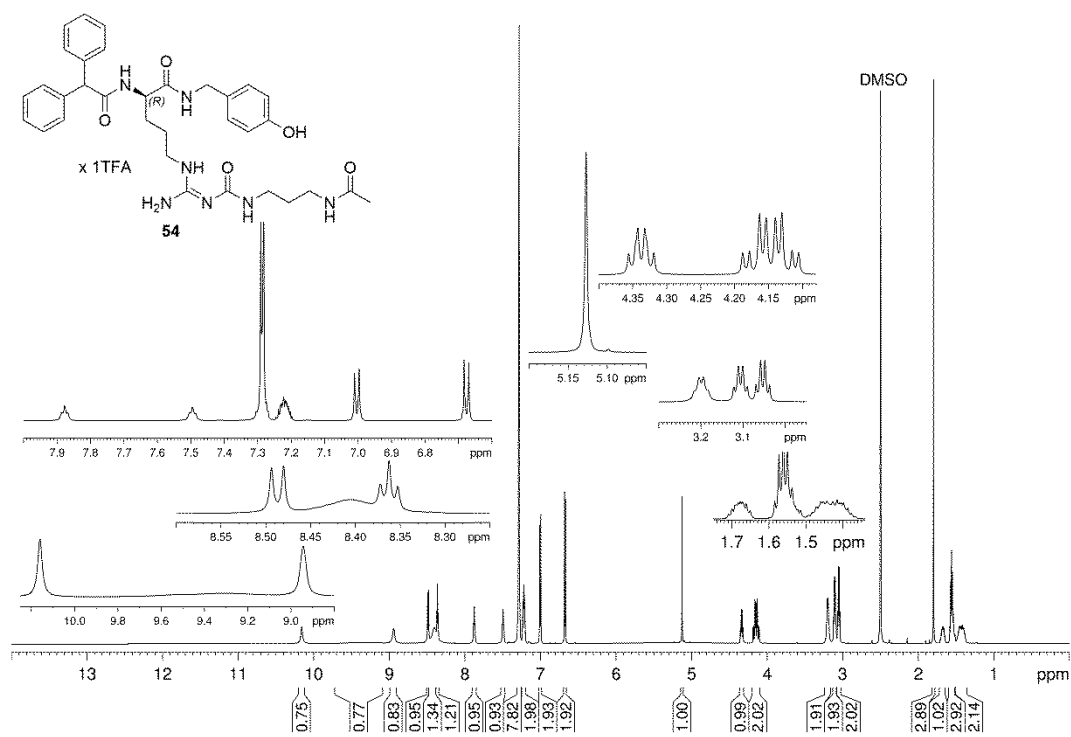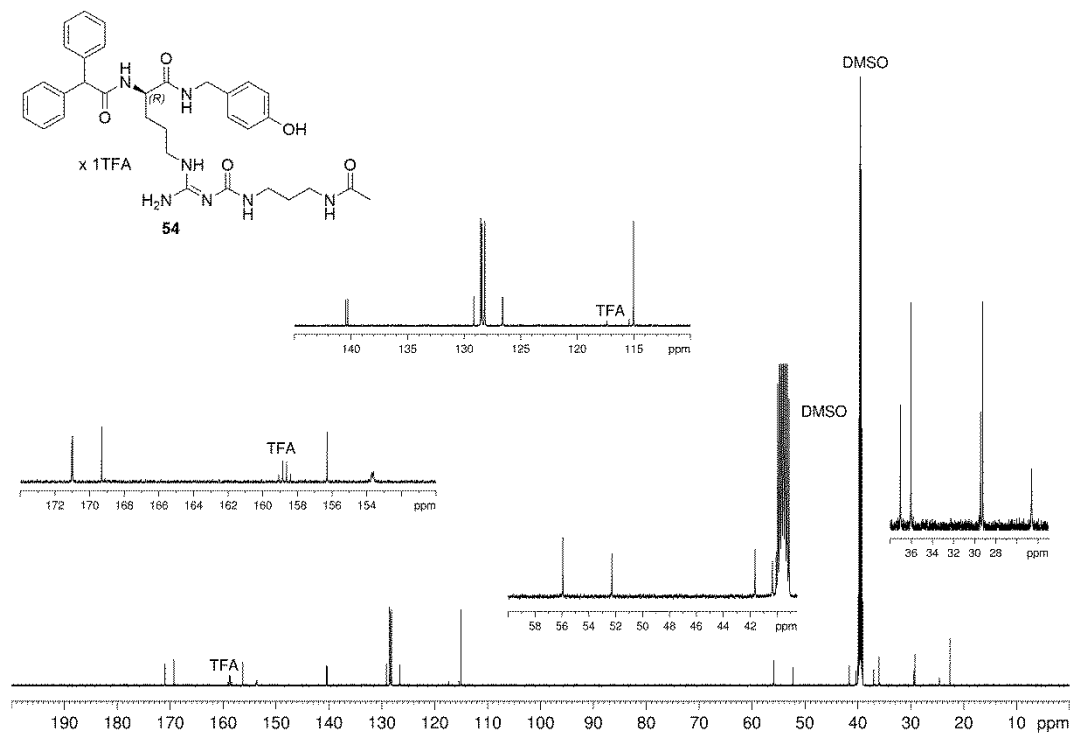

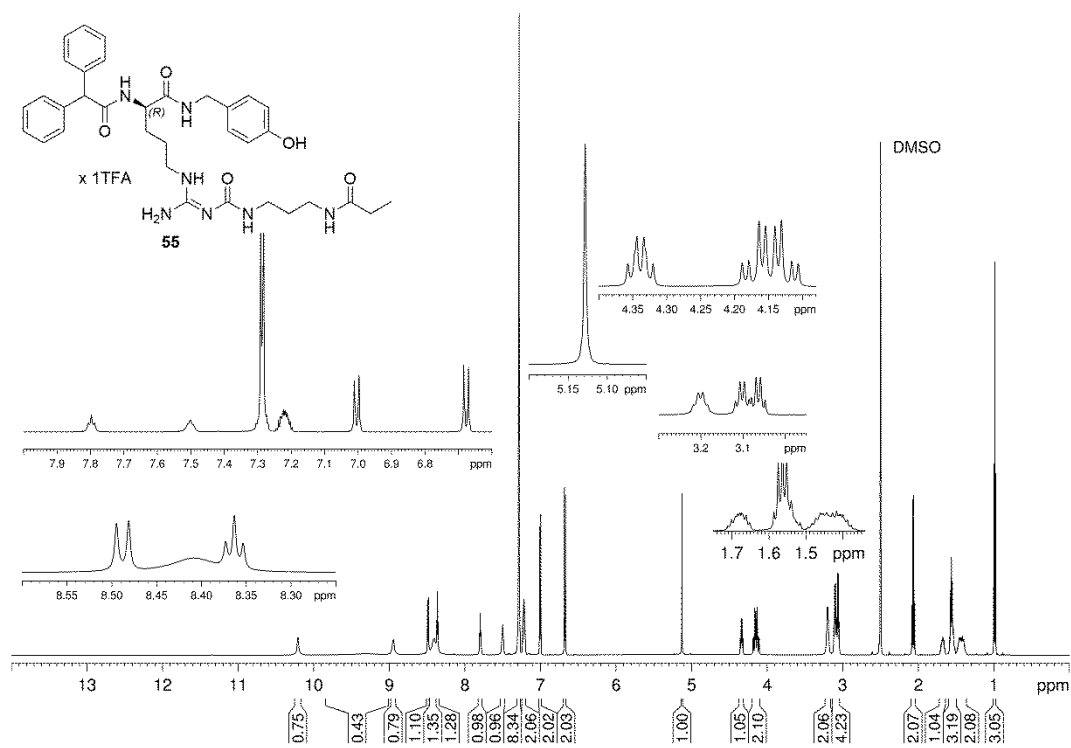

**<sup>1</sup>H-NMR of compound 55**

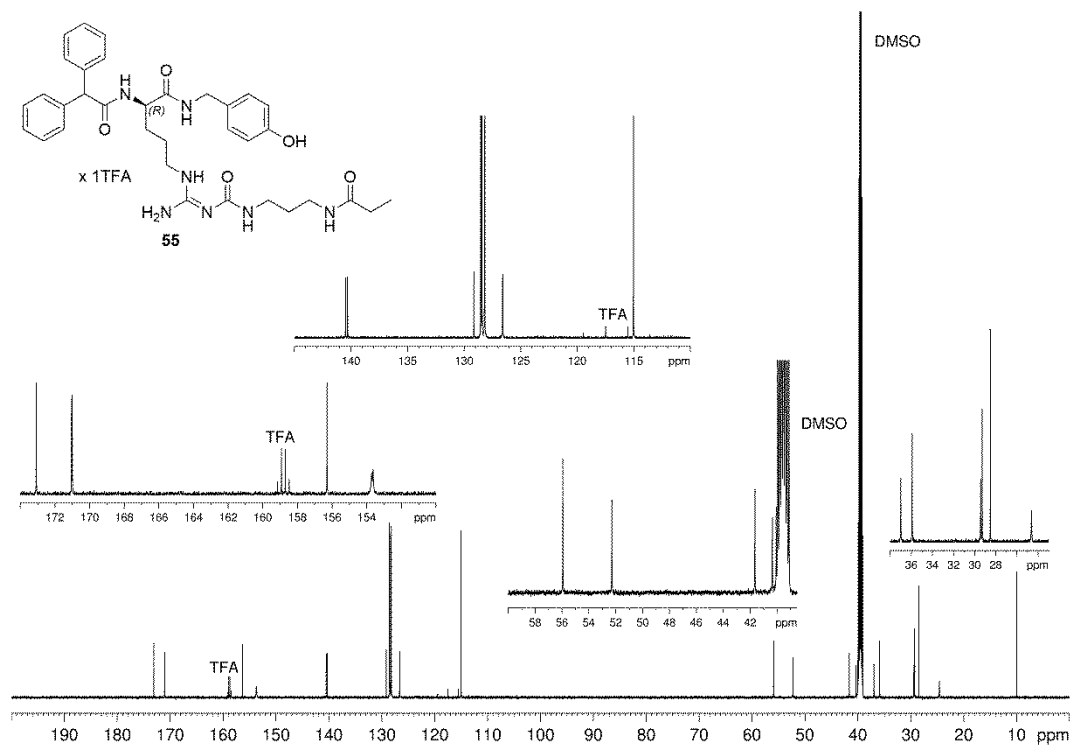

**<sup>13</sup>C-NMR of compound 55**

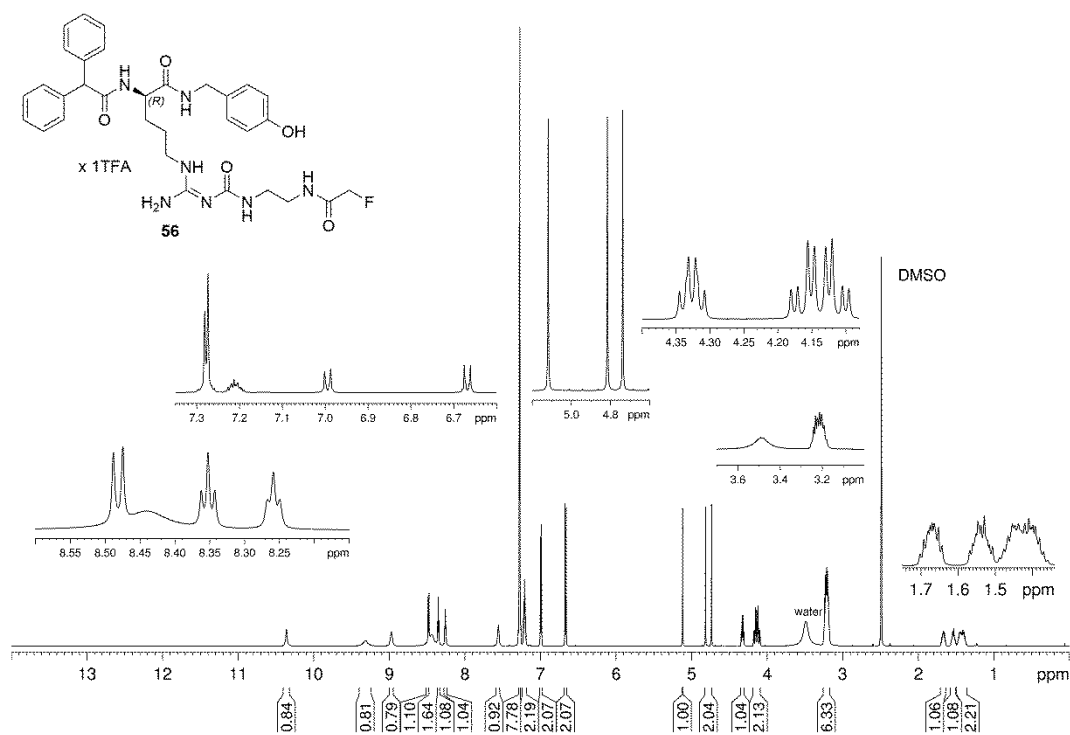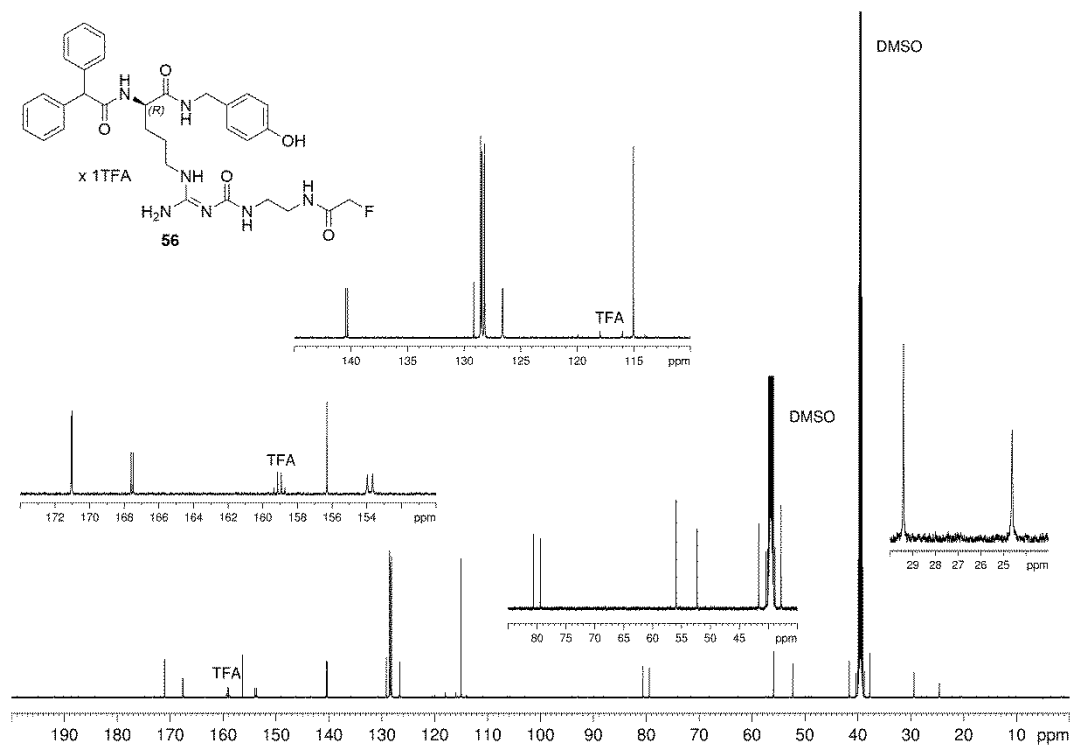

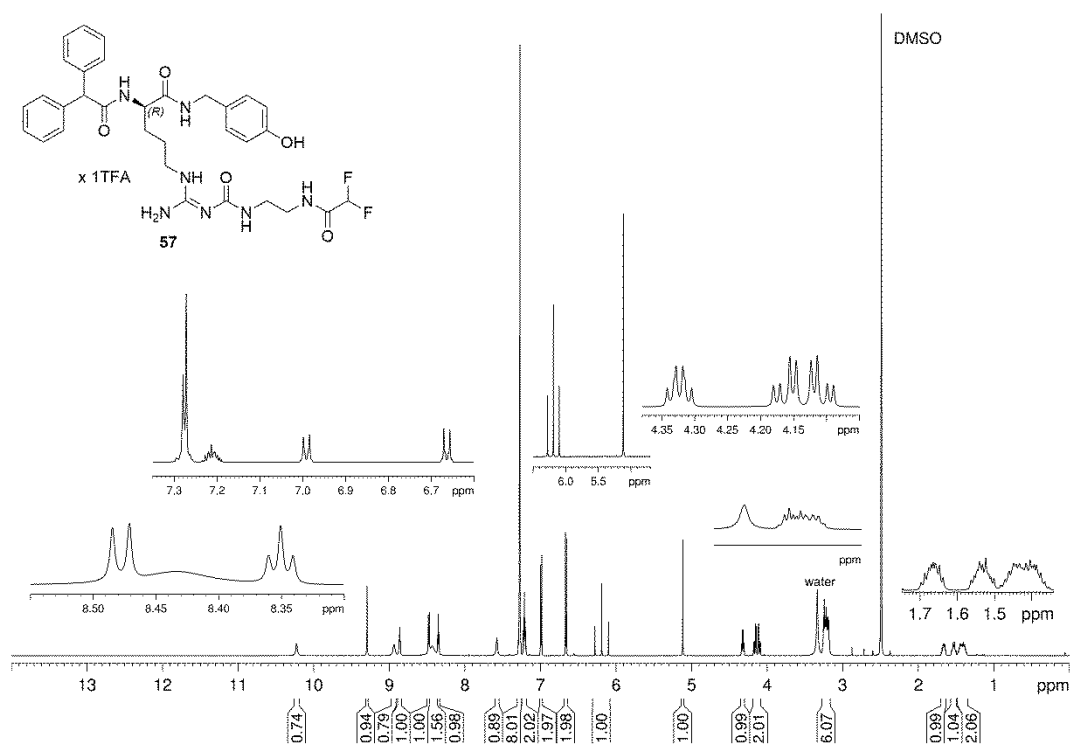

$^1\text{H}$ -NMR of compound **57**

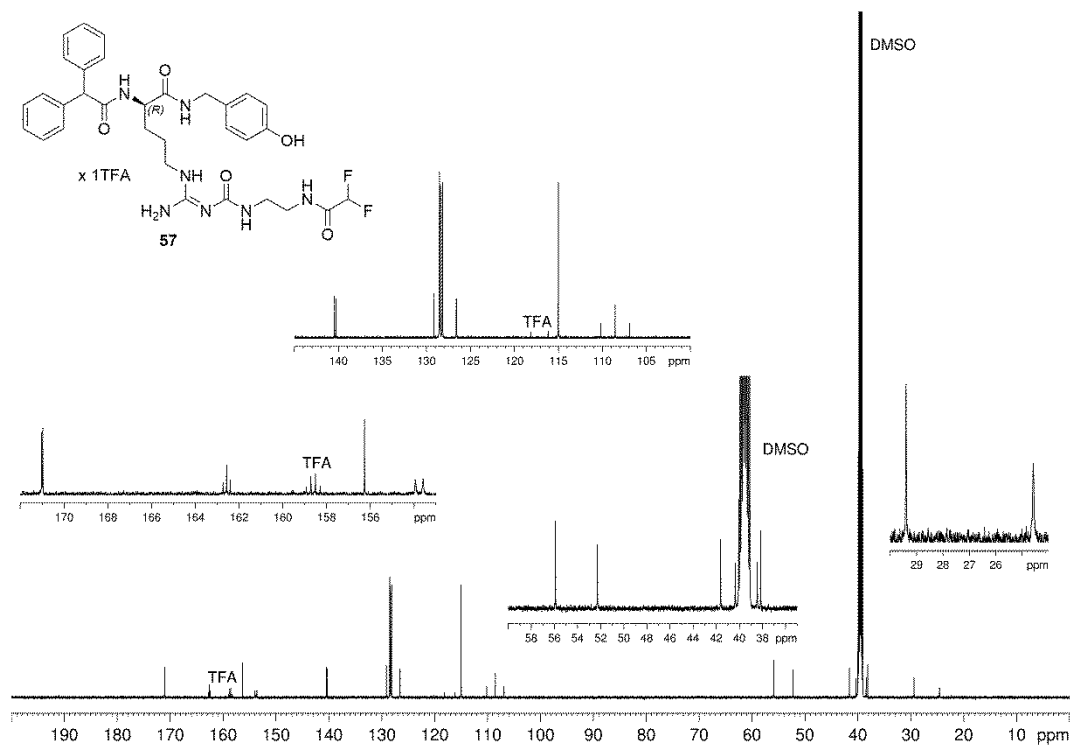

$^{13}\text{C}$ -NMR of compound **57**

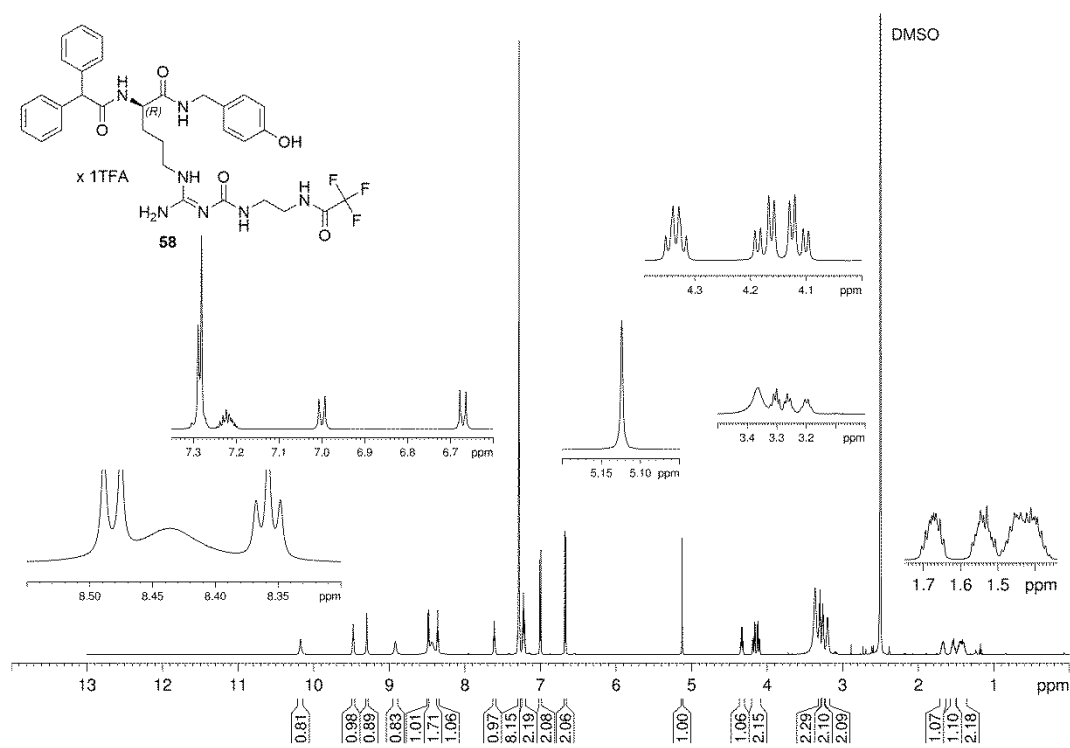

<sup>1</sup>H-NMR of compound **58**

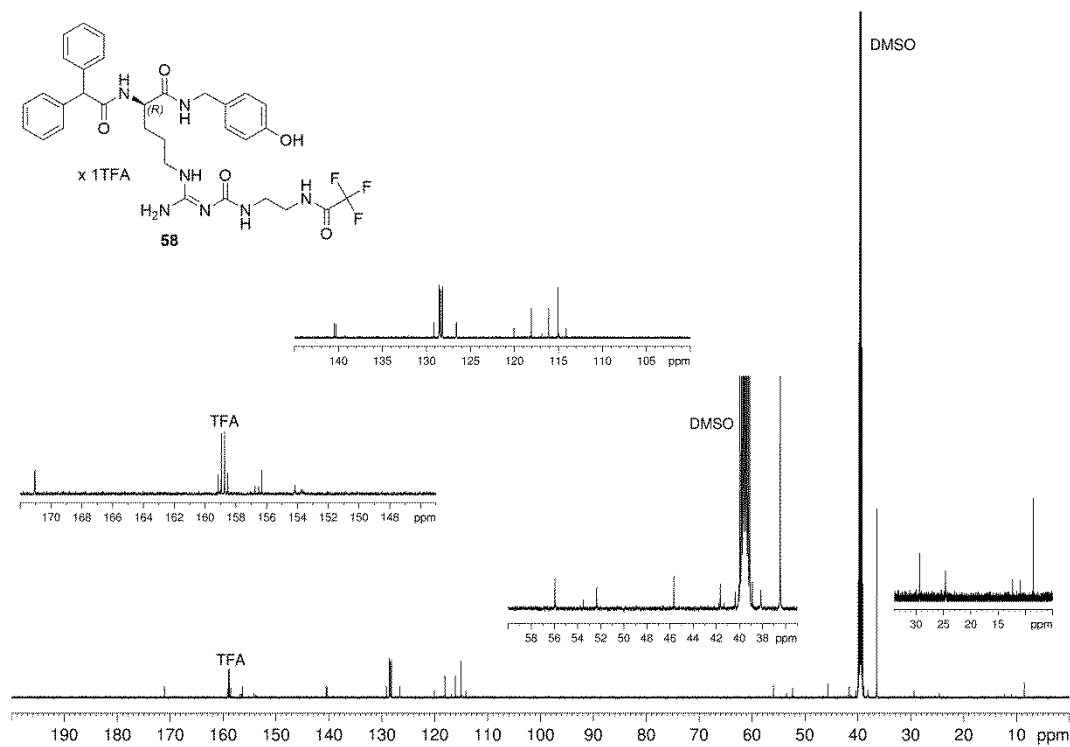

<sup>13</sup>C-NMR of compound **58**

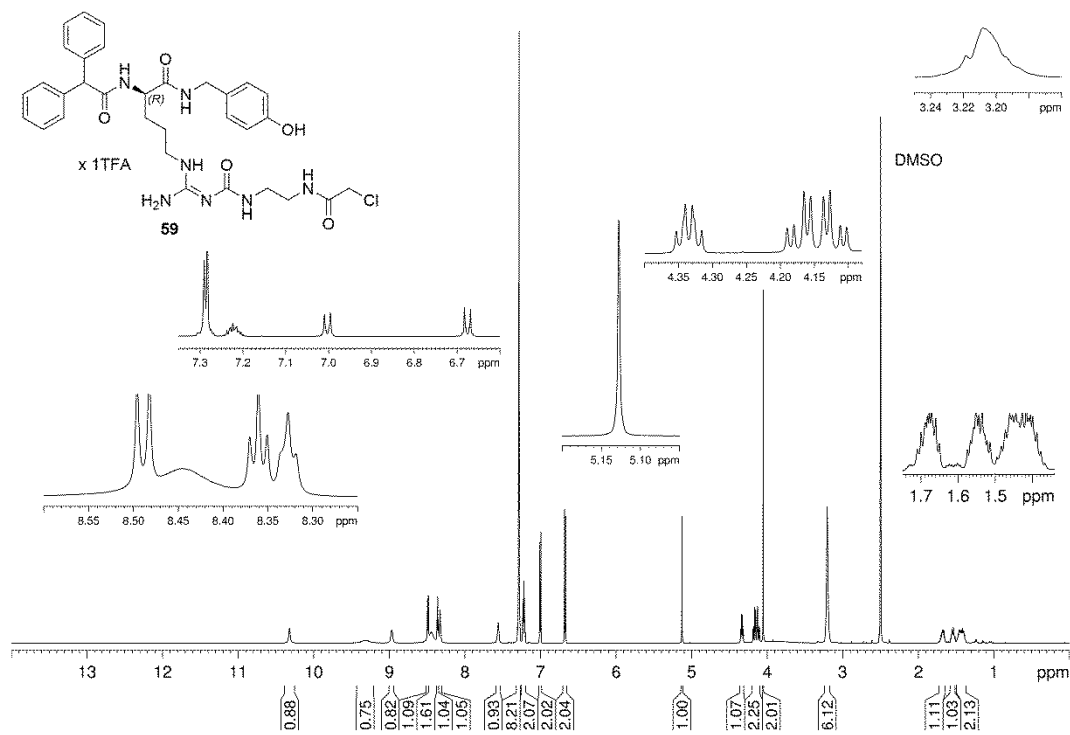

<sup>1</sup>H-NMR of compound **59**

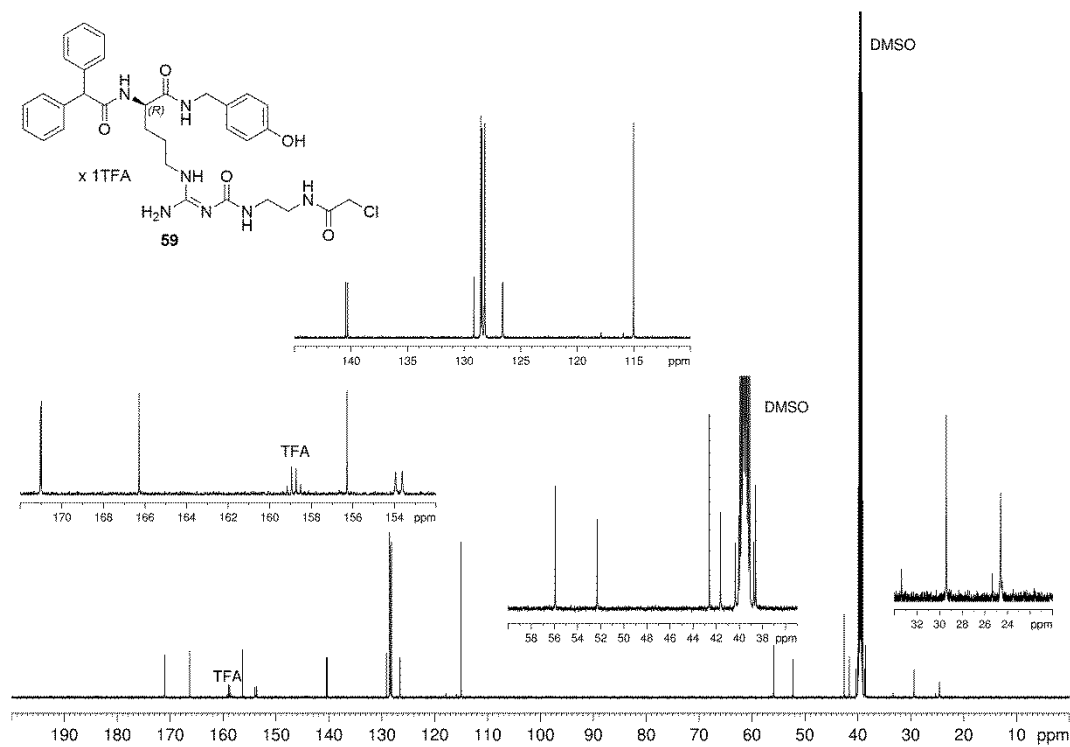

<sup>13</sup>C-NMR of compound **59**

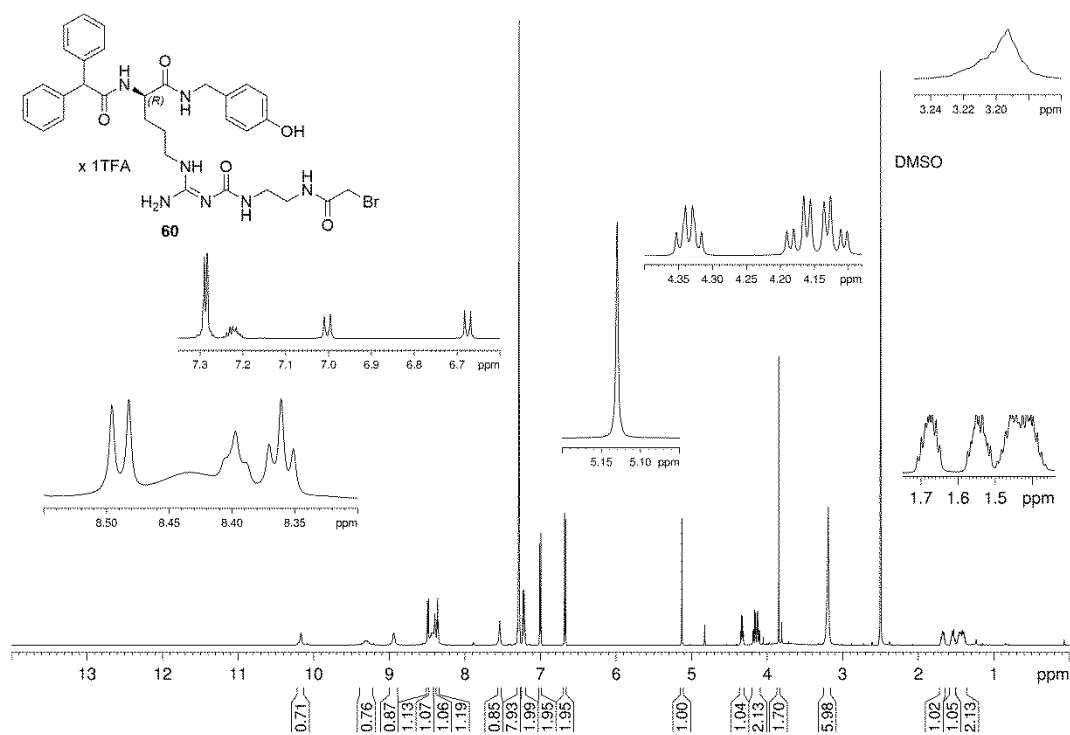

<sup>1</sup>H-NMR of compound **60**

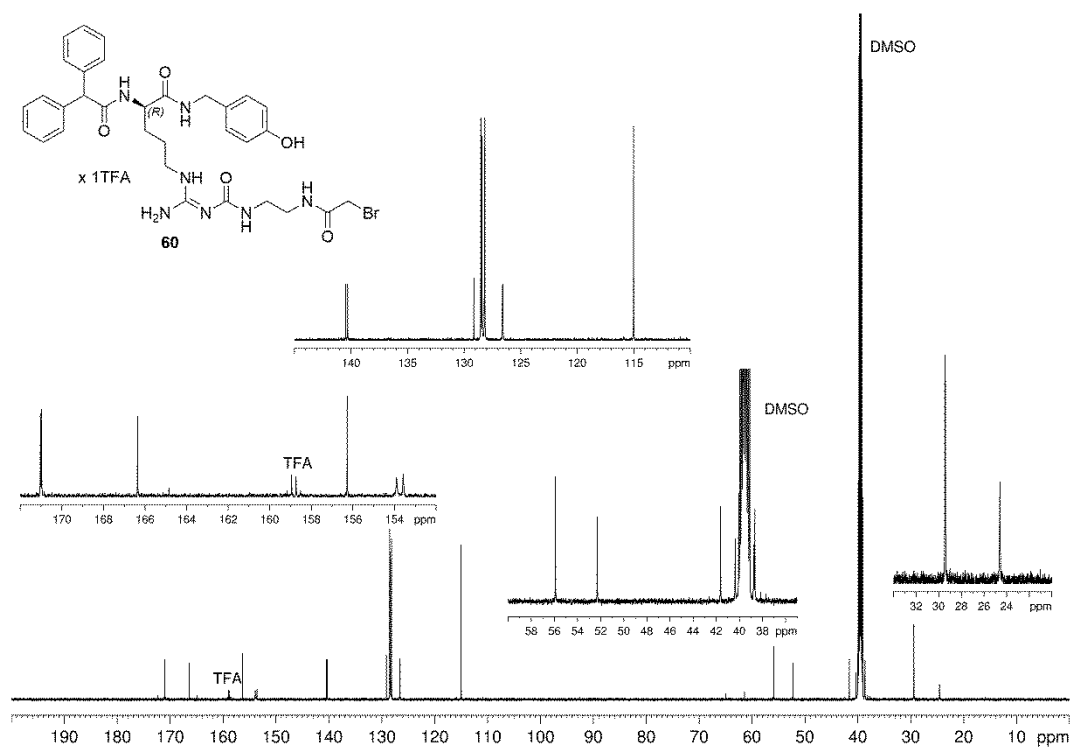

<sup>13</sup>C-NMR of compound **60**

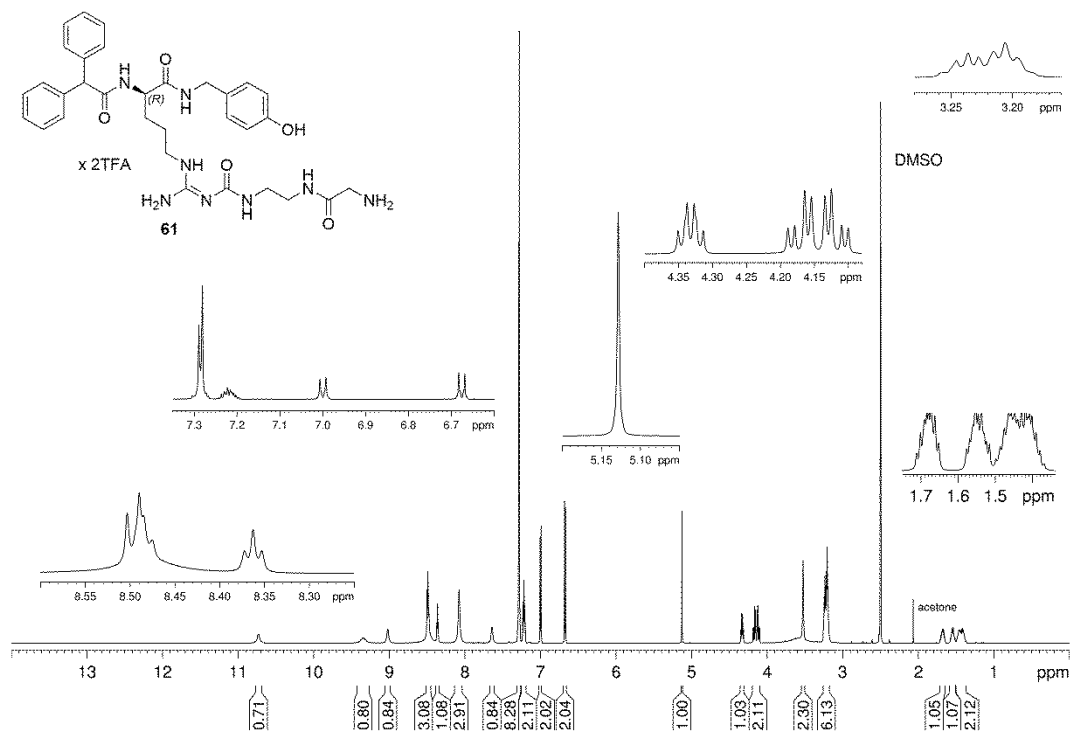

**<sup>1</sup>H-NMR of compound 61**

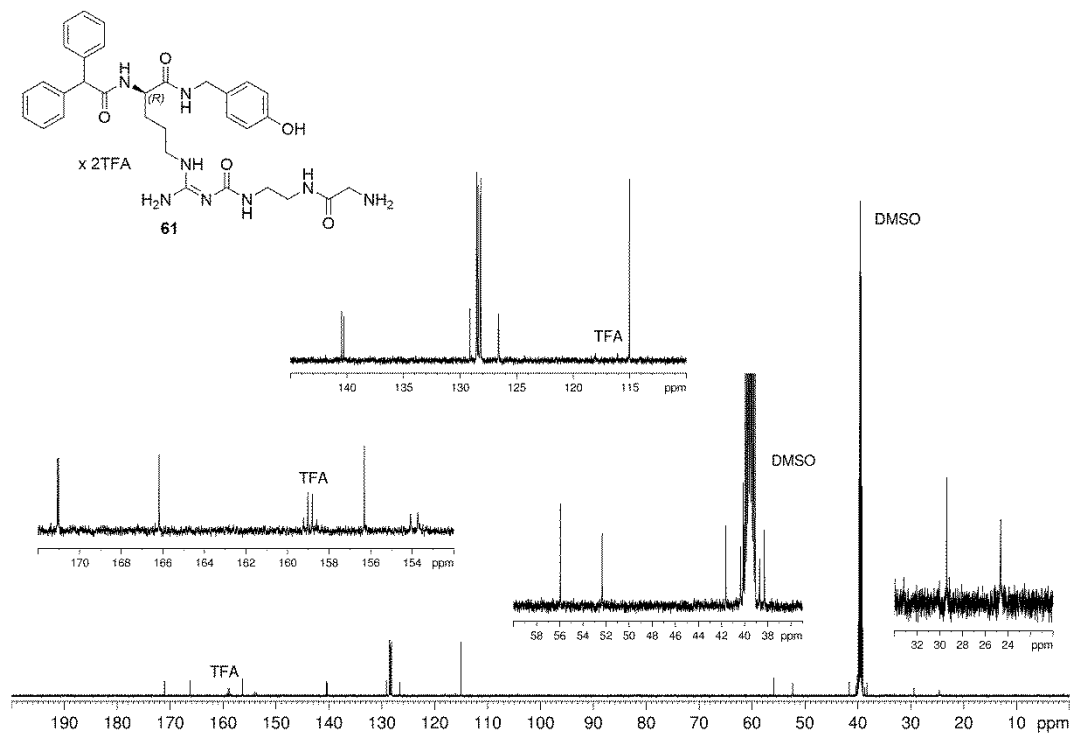

**<sup>13</sup>C-NMR of compound 61**

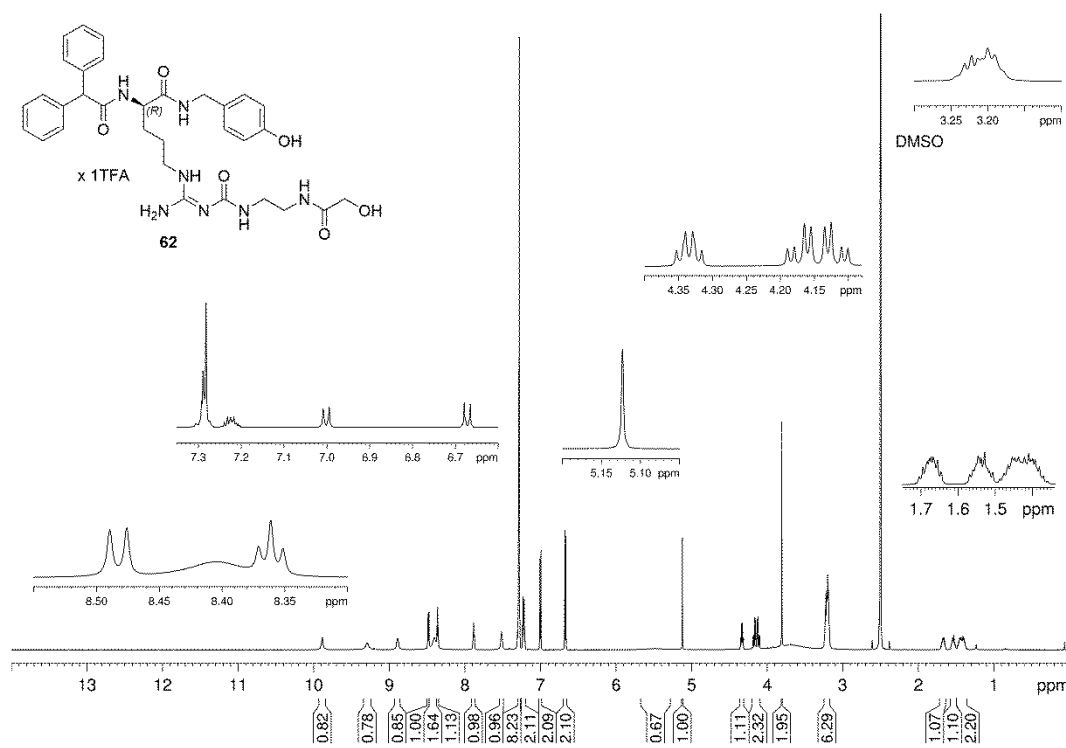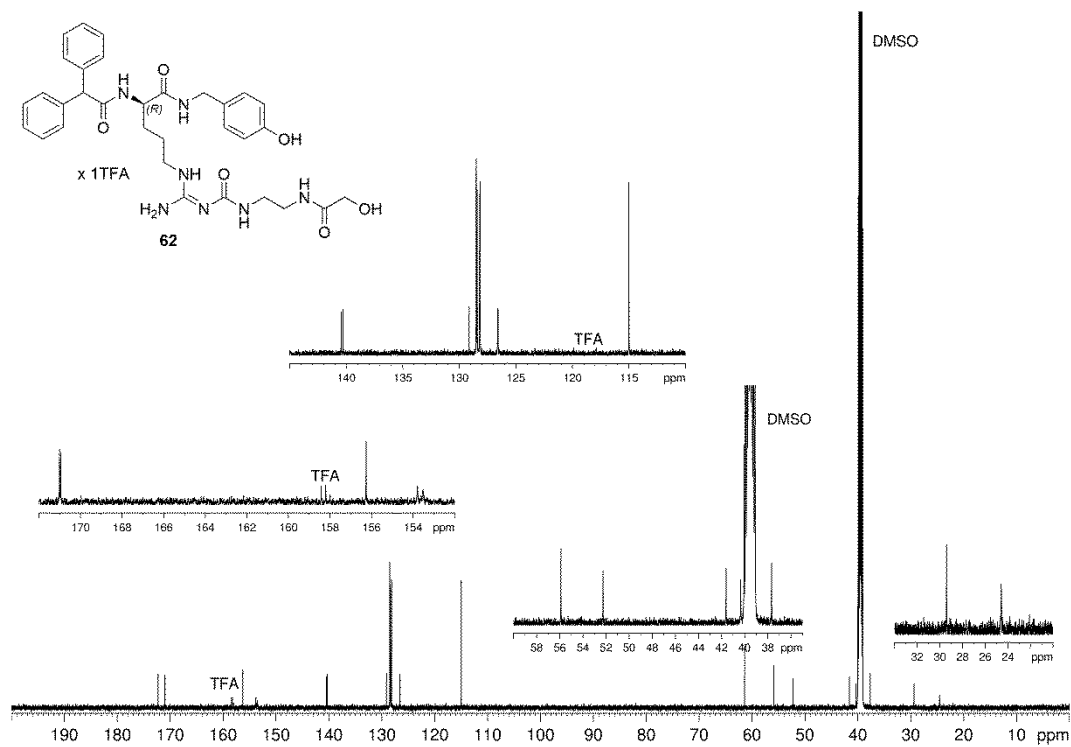

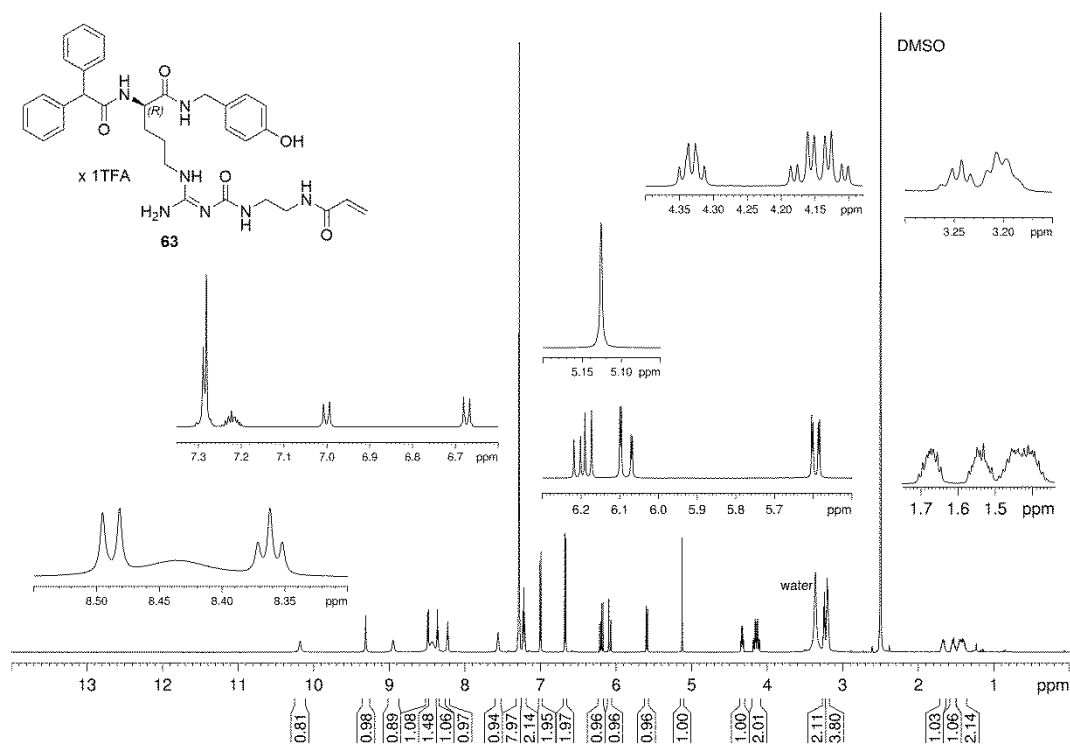

**<sup>1</sup>H-NMR of compound 63**

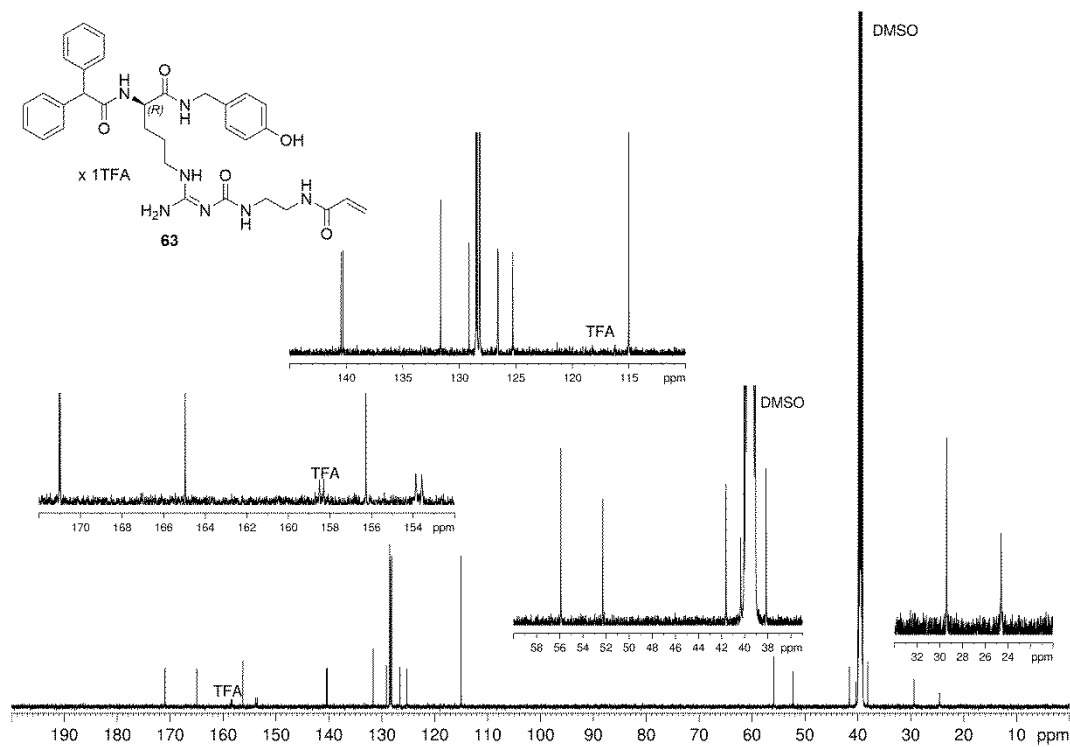

**<sup>13</sup>C-NMR of compound 63**

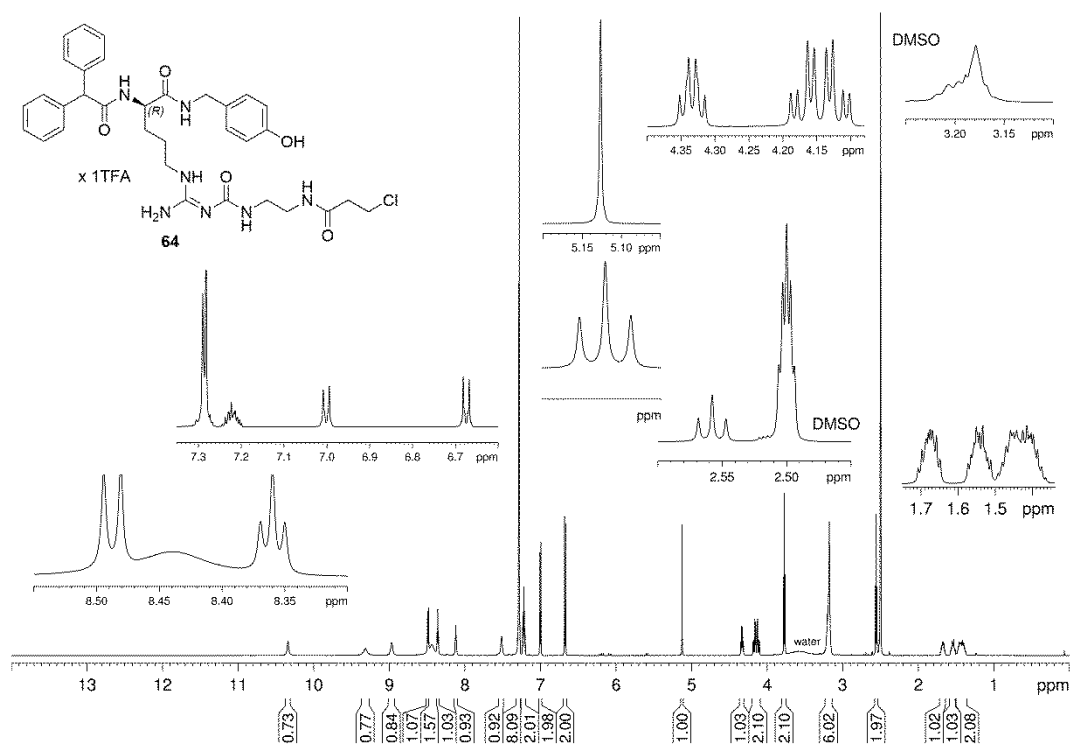

**<sup>1</sup>H-NMR of compound 64**

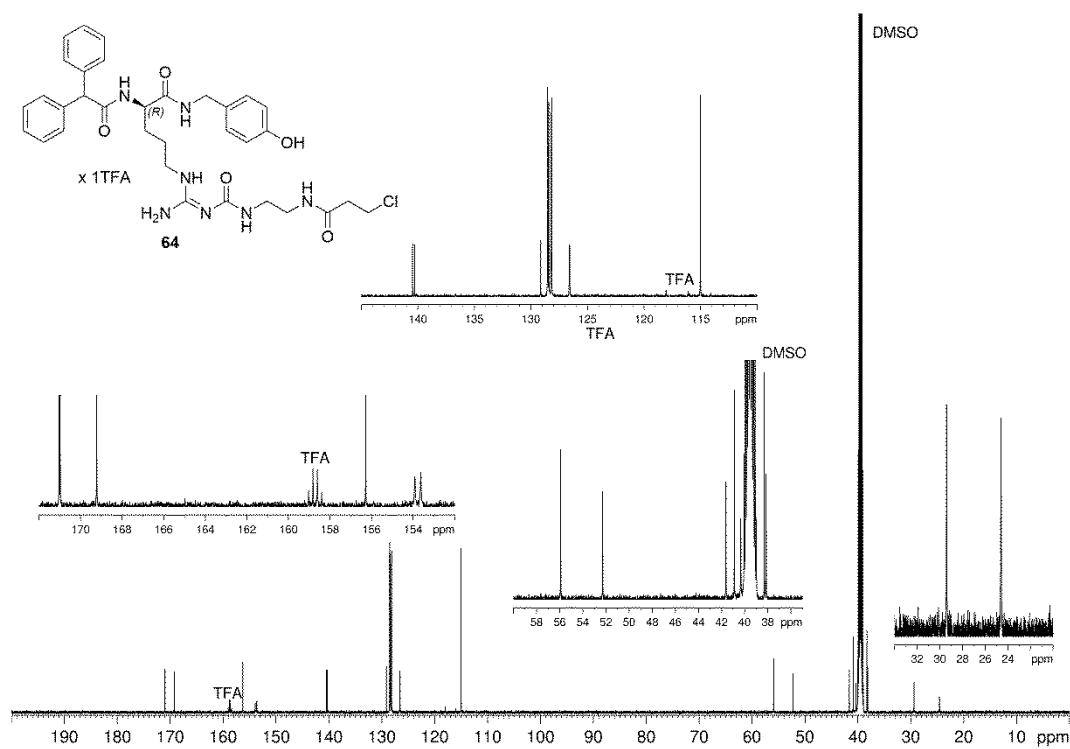

**<sup>13</sup>C-NMR of compound 64**

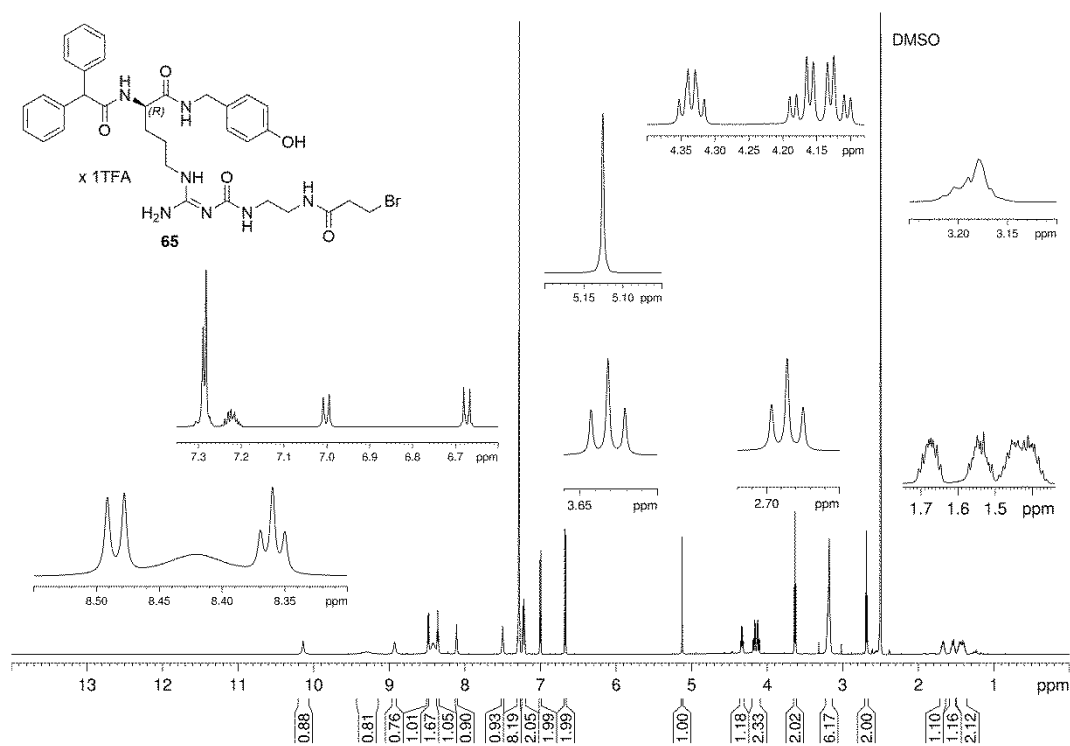

<sup>1</sup>H-NMR of compound **65**

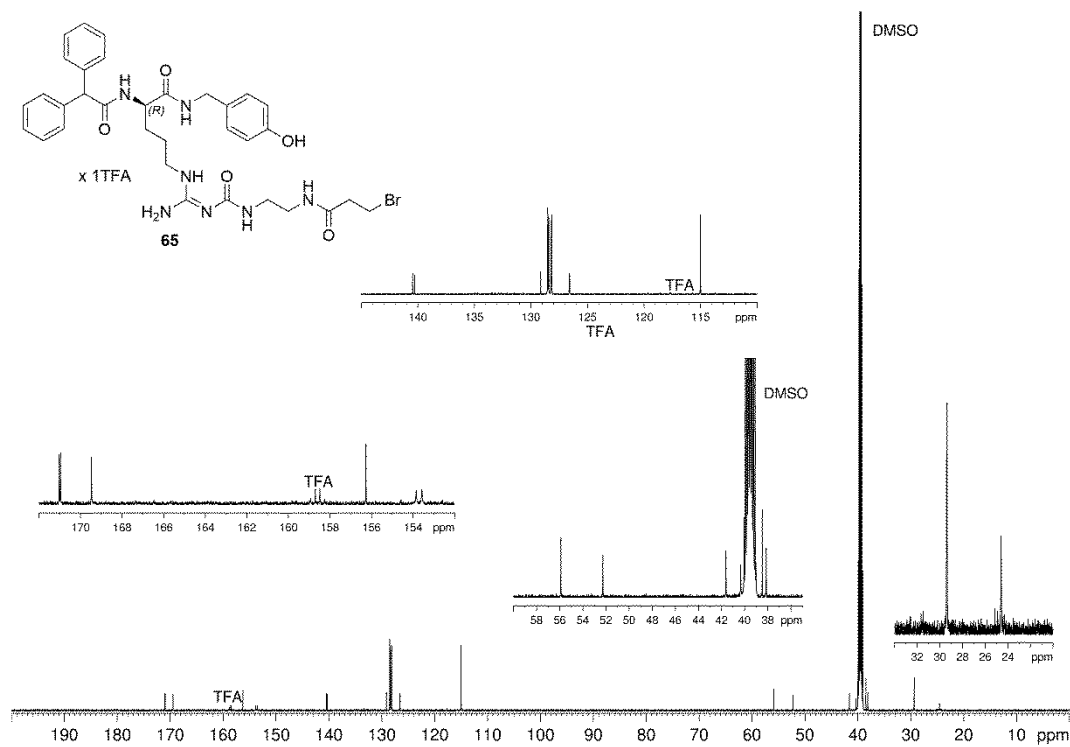

<sup>13</sup>C-NMR of compound **65**

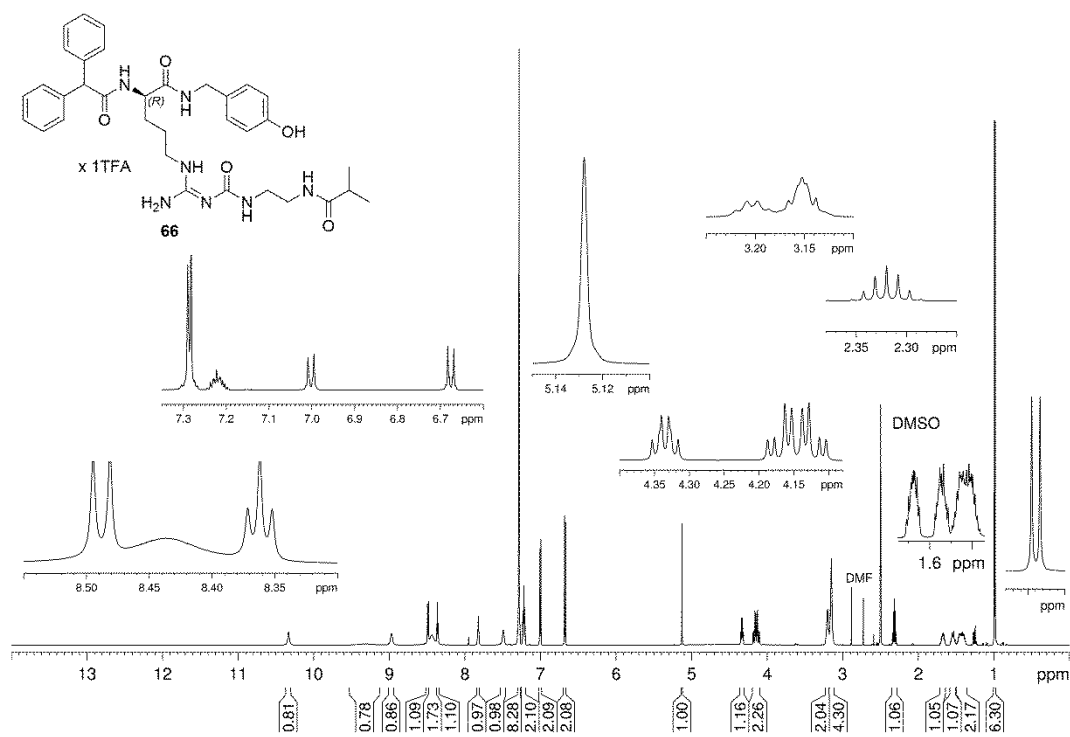

**<sup>1</sup>H-NMR of compound 66**

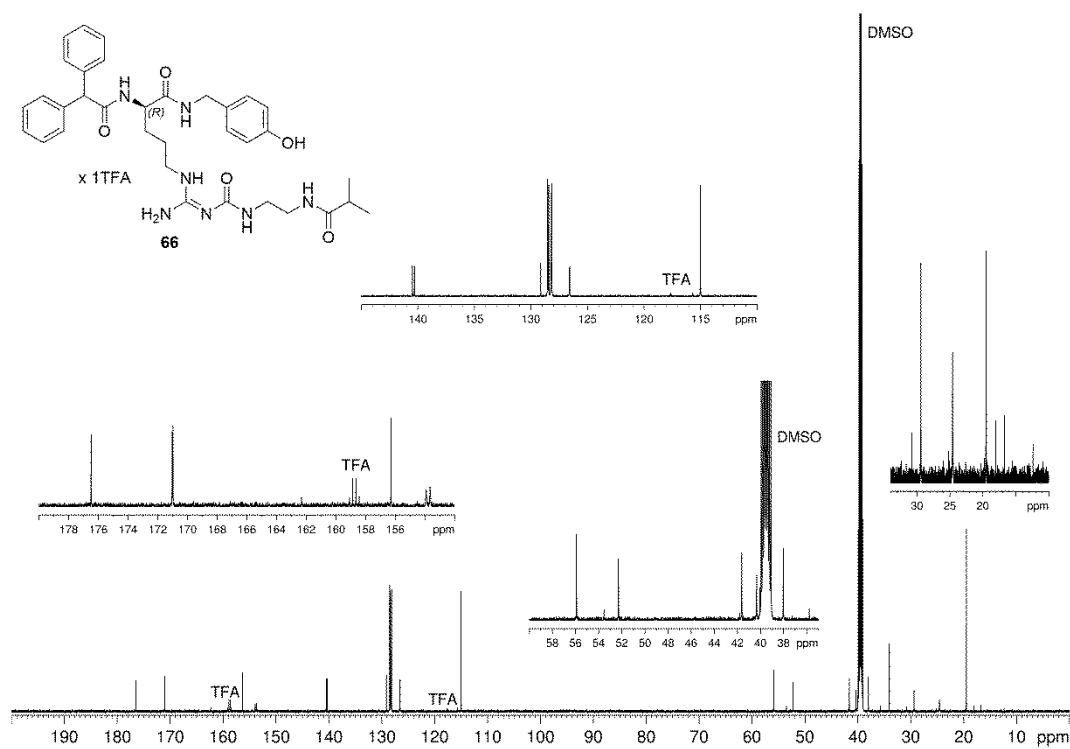

**<sup>13</sup>C-NMR of compound 66**

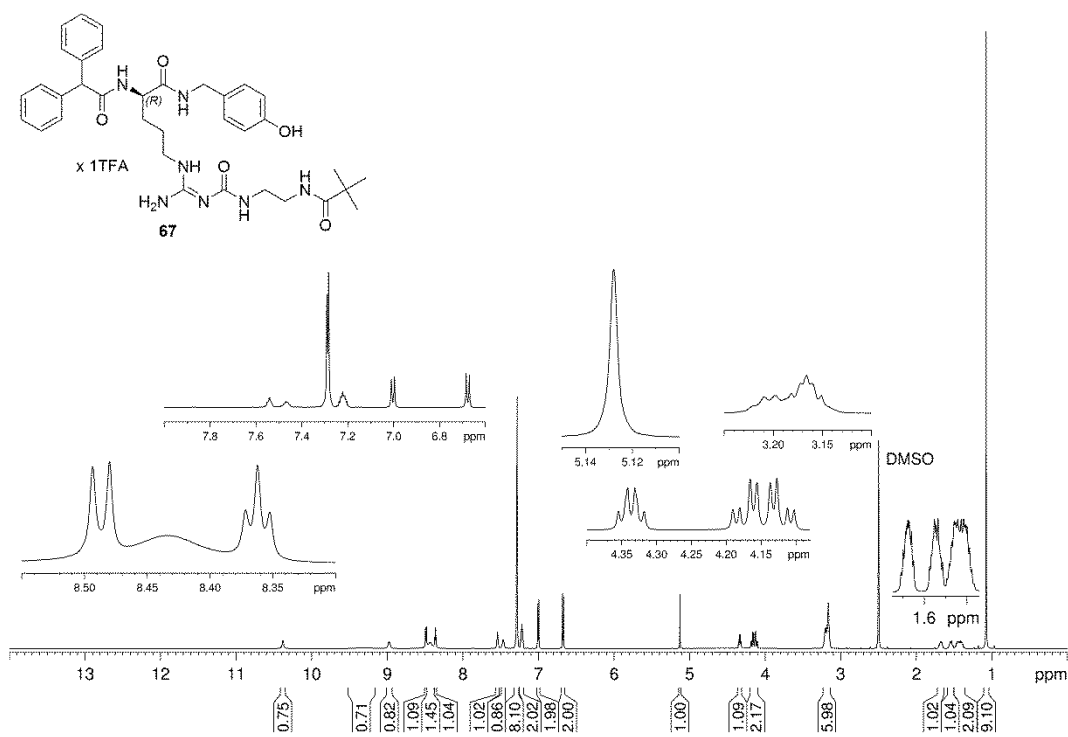

$^1\text{H}$ -NMR of compound **67**

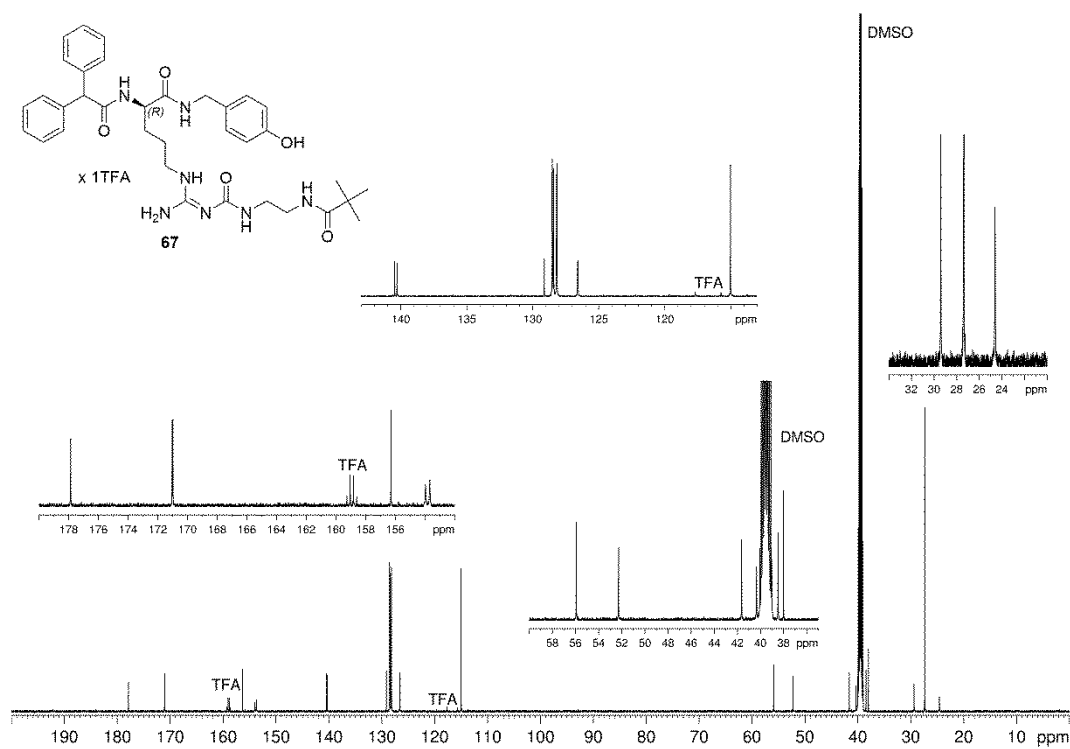

$^{13}\text{C}$ -NMR of compound **67**

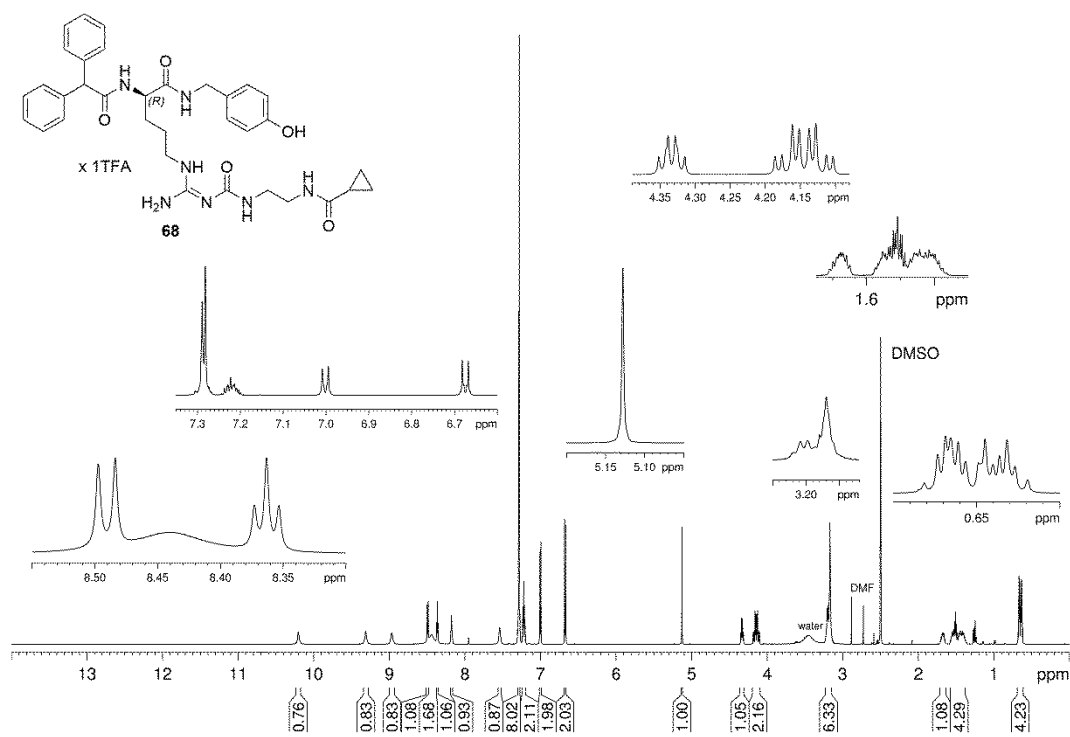

<sup>1</sup>H-NMR of compound **68**

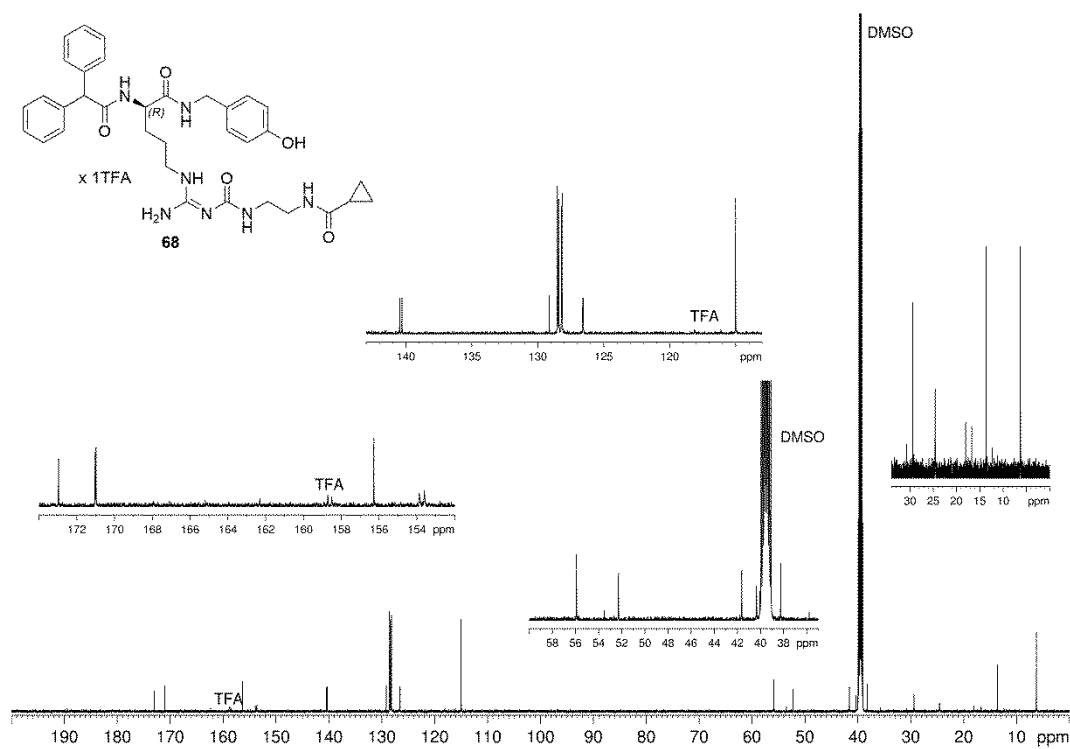

<sup>13</sup>C-NMR of compound **68**

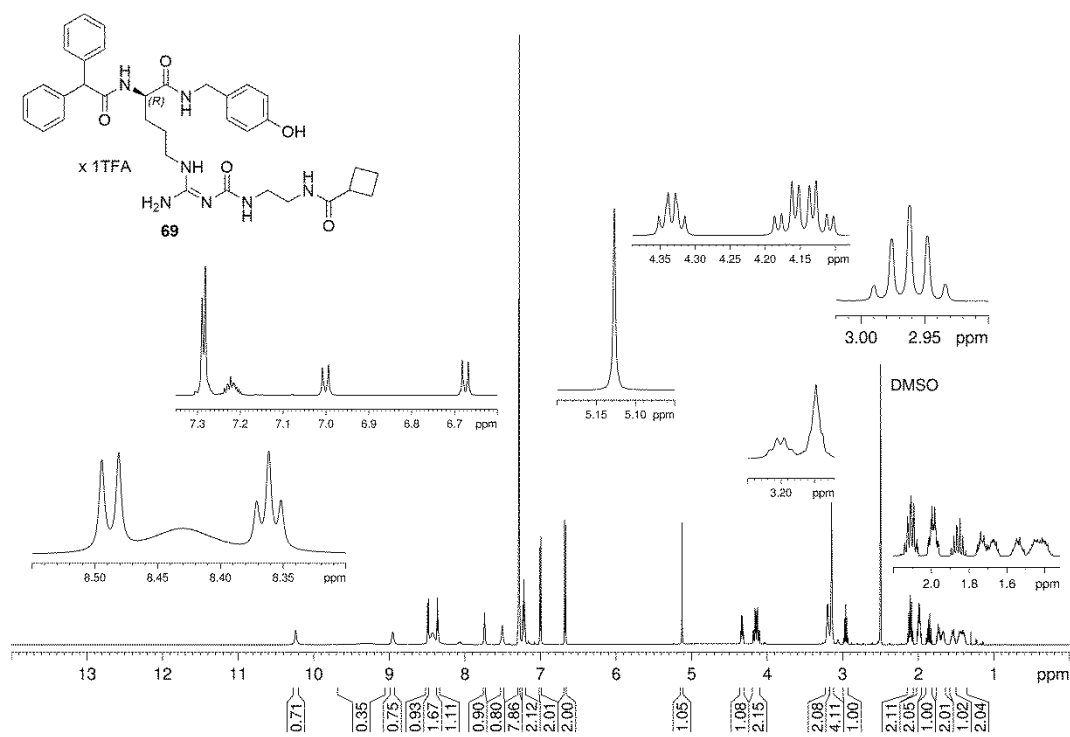

<sup>1</sup>H-NMR of compound **69**

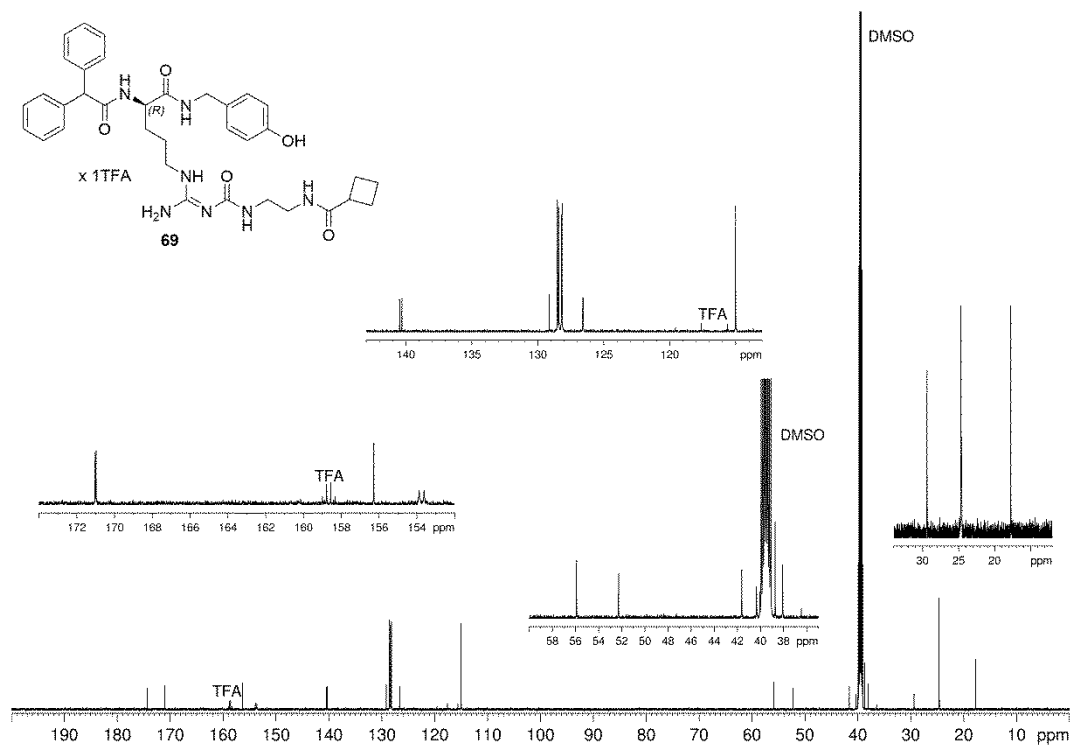

<sup>13</sup>C-NMR of compound **69**

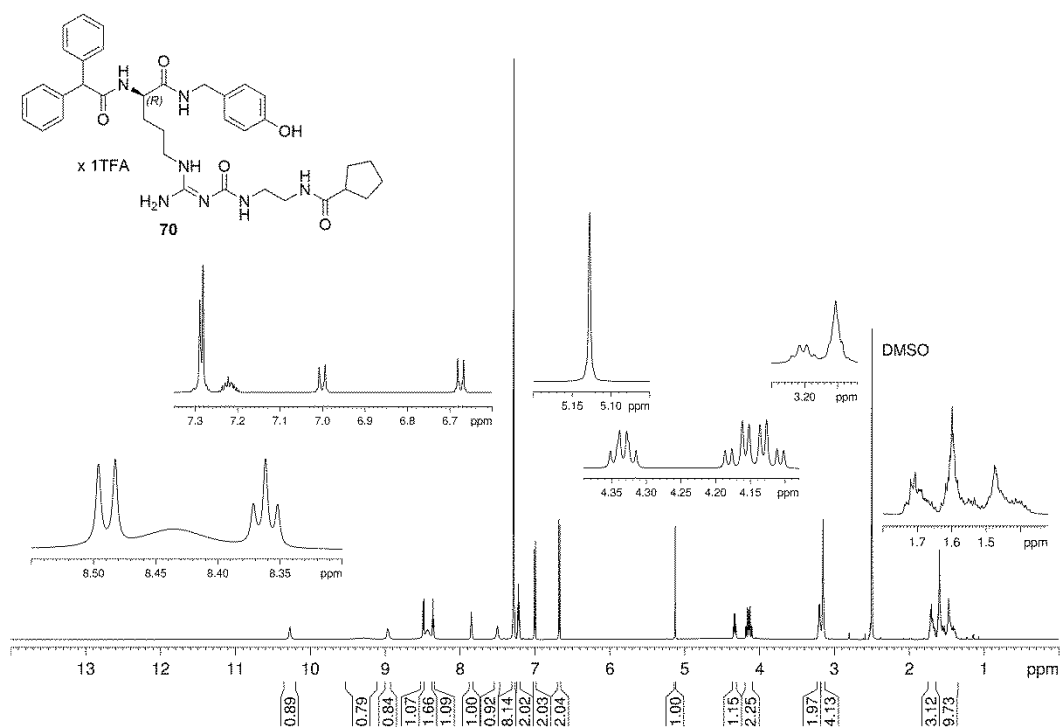

$^1\text{H}$ -NMR of compound **70**

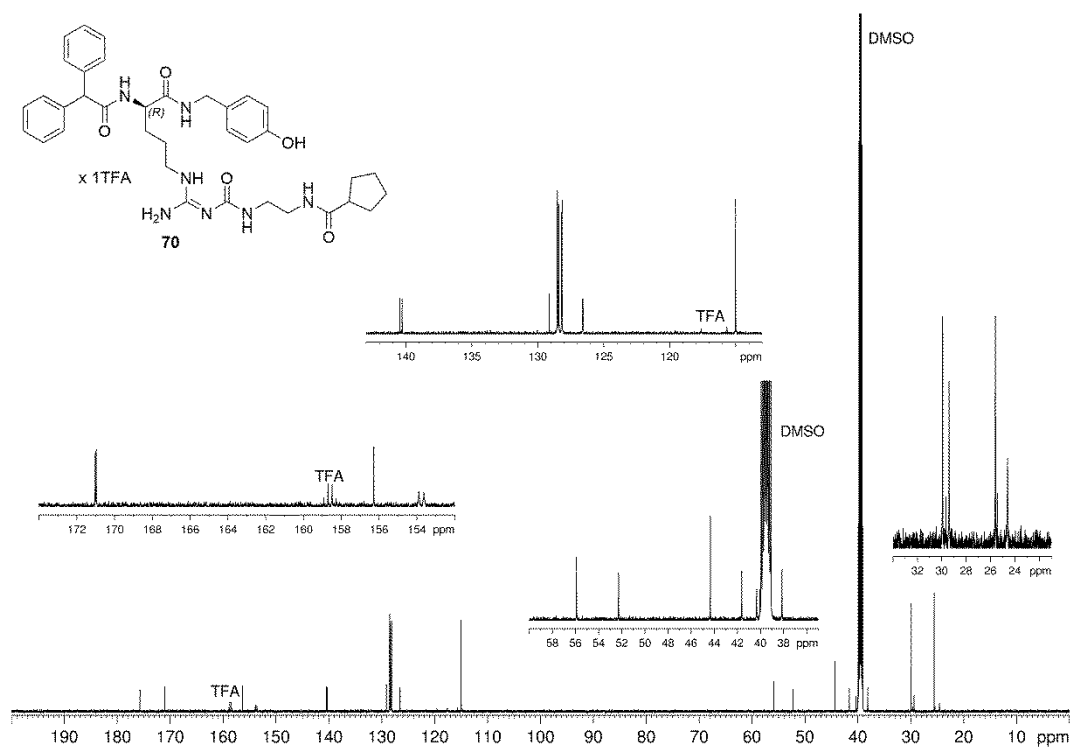

$^{13}\text{C}$ -NMR of compound **70**

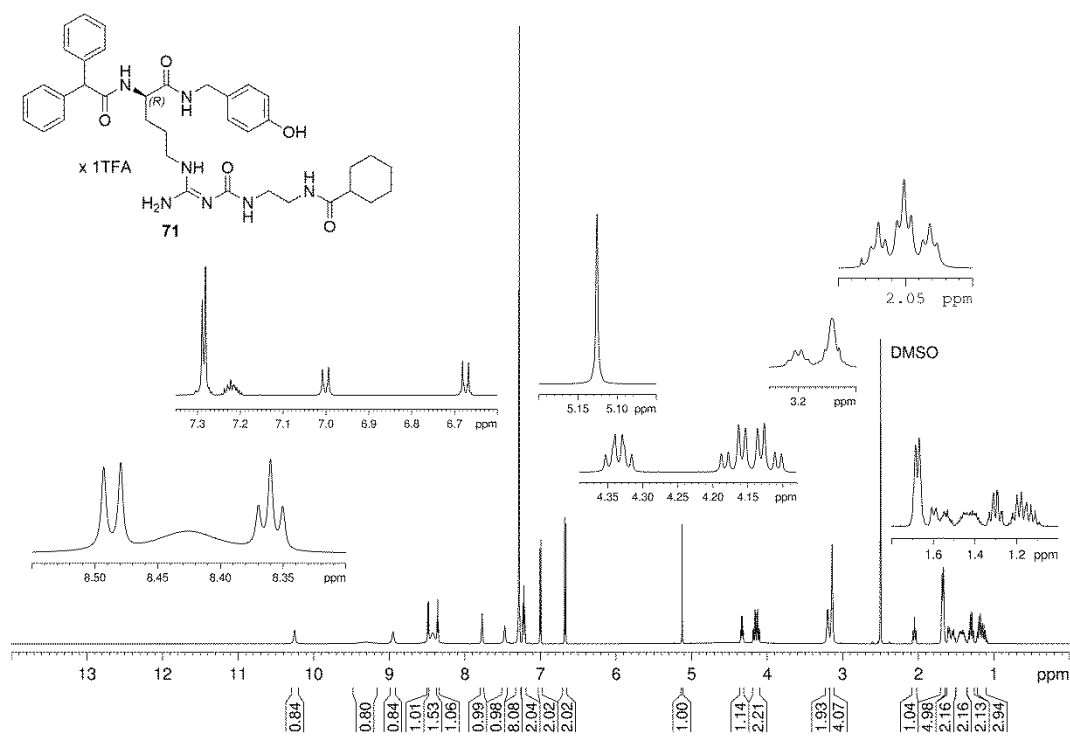

**<sup>1</sup>H-NMR of compound 71**

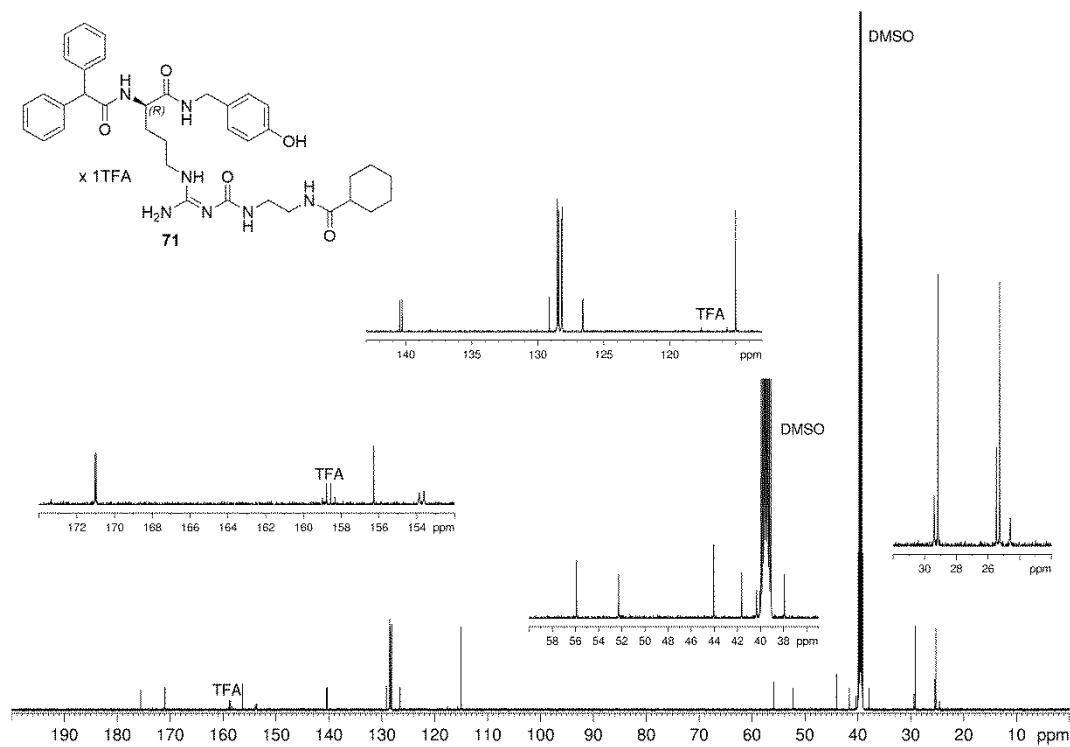

**<sup>13</sup>C-NMR of compound 71**

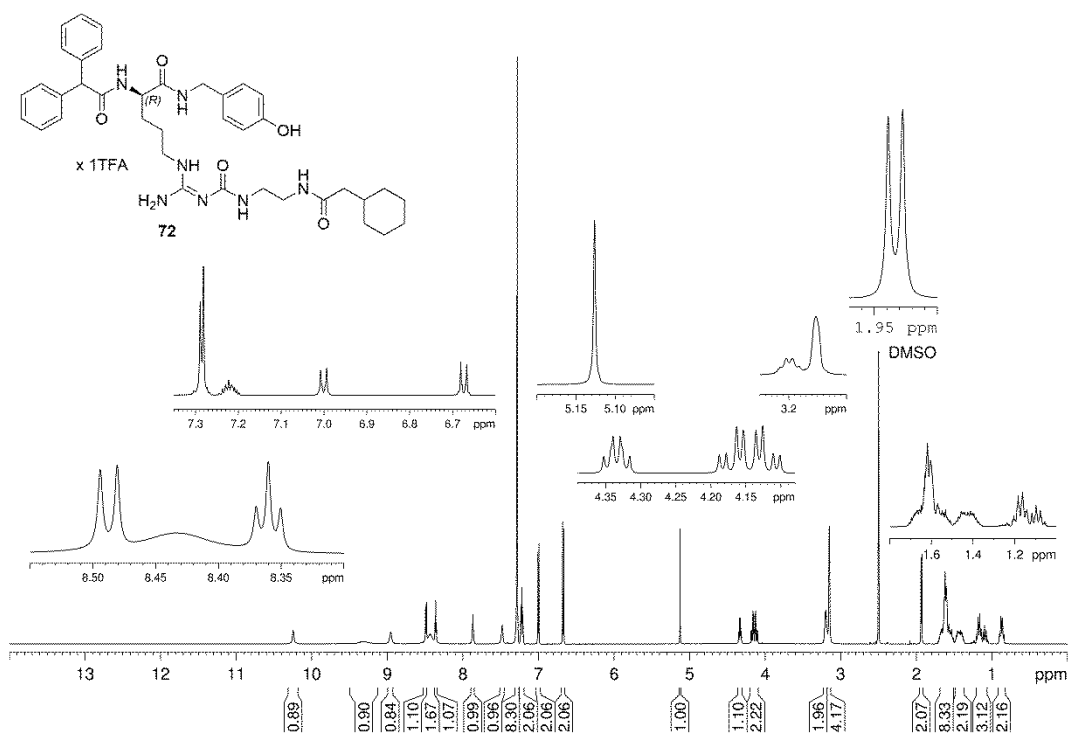

**<sup>1</sup>H-NMR of compound 72**

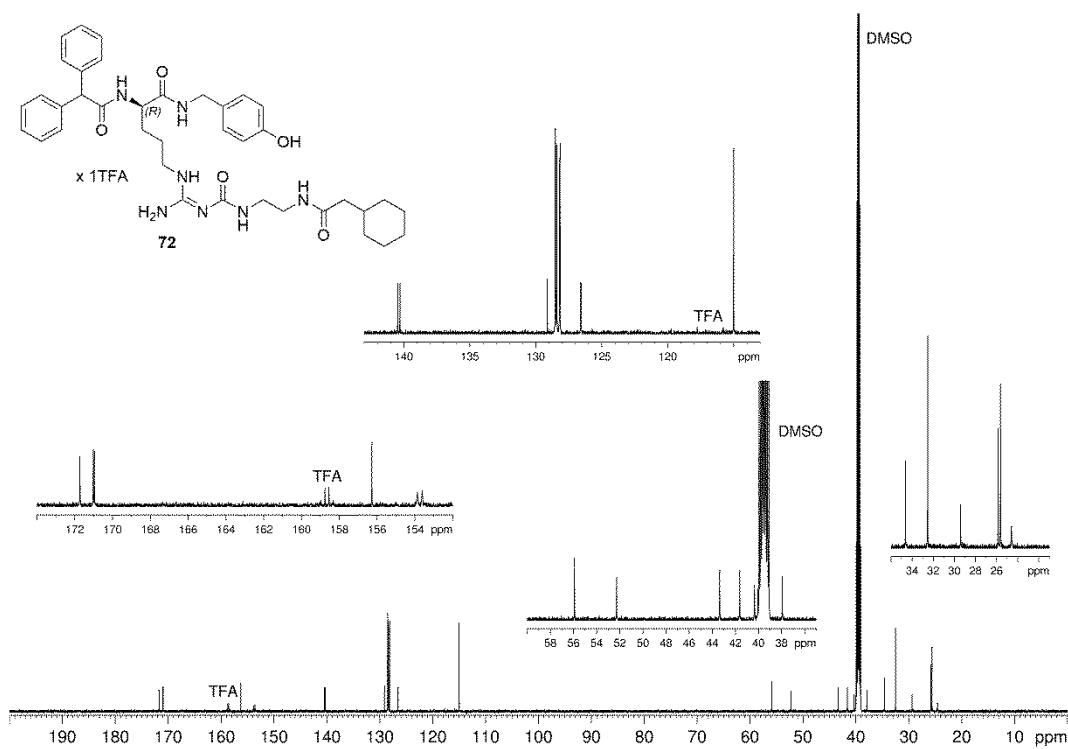

**<sup>13</sup>C-NMR of compound 72**

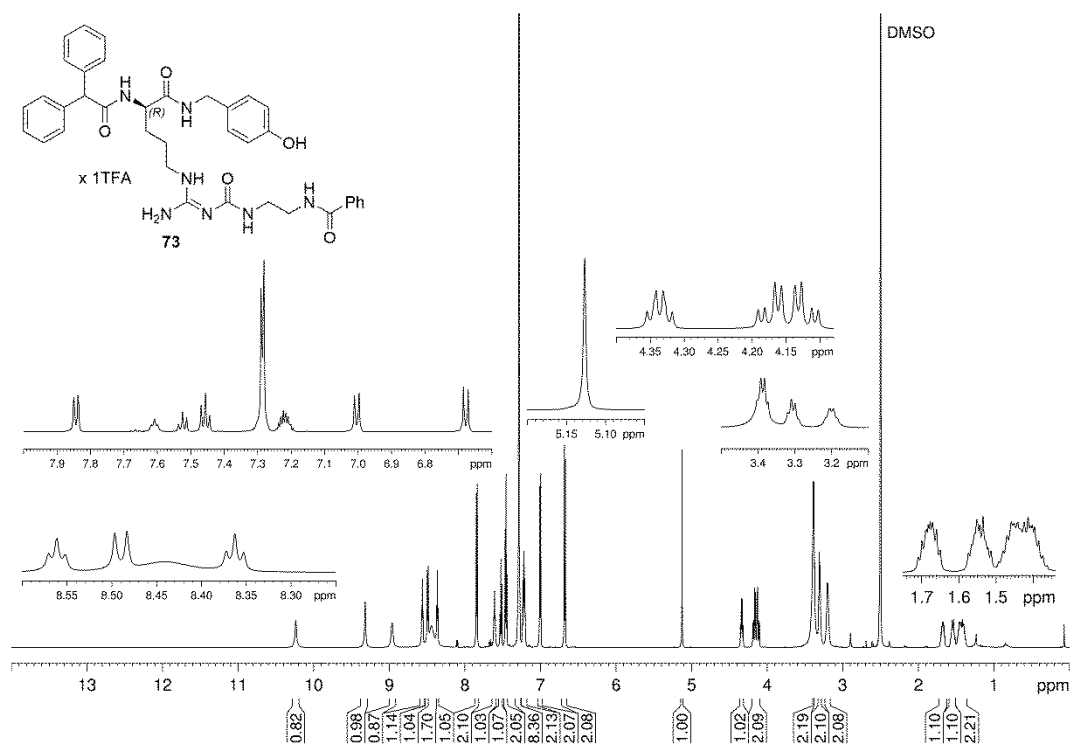

$^1\text{H}$ -NMR of compound **73**

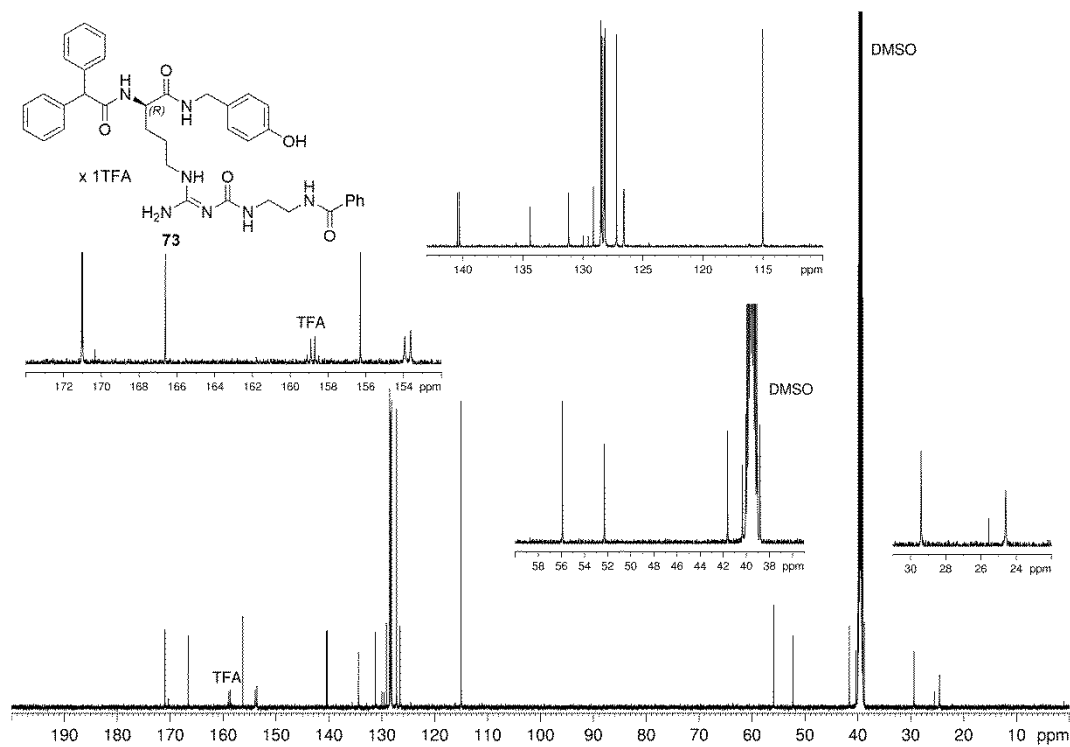

$^{13}\text{C}$ -NMR of compound **73**

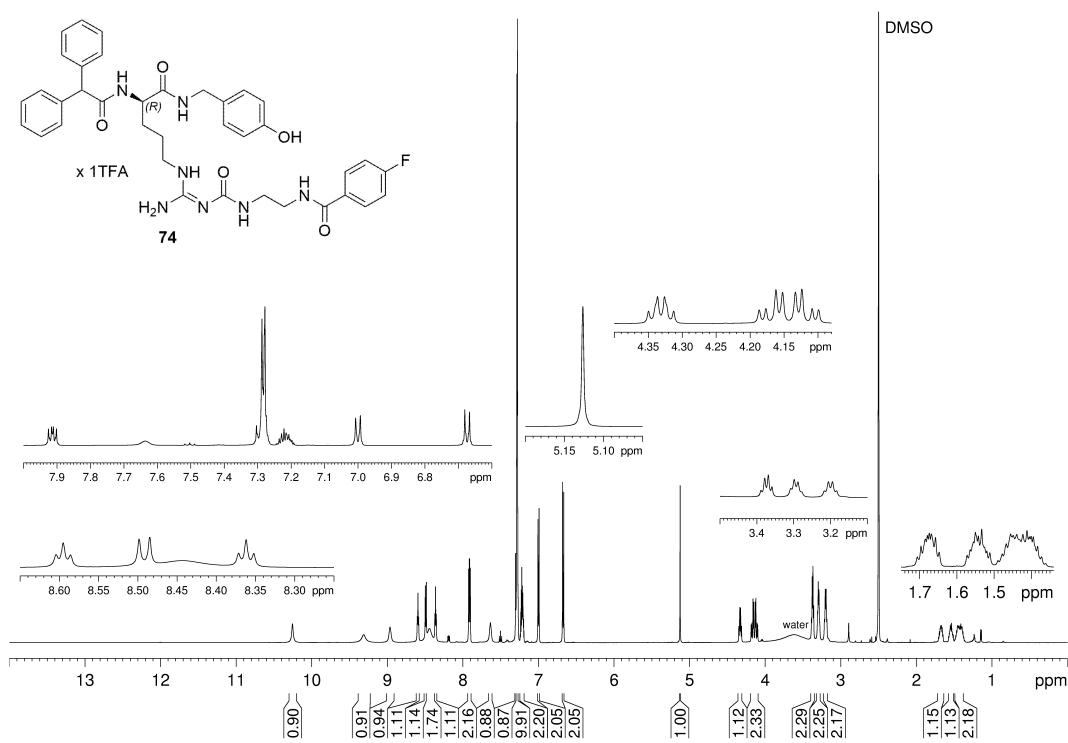

$^1\text{H}$ -NMR of compound **74**

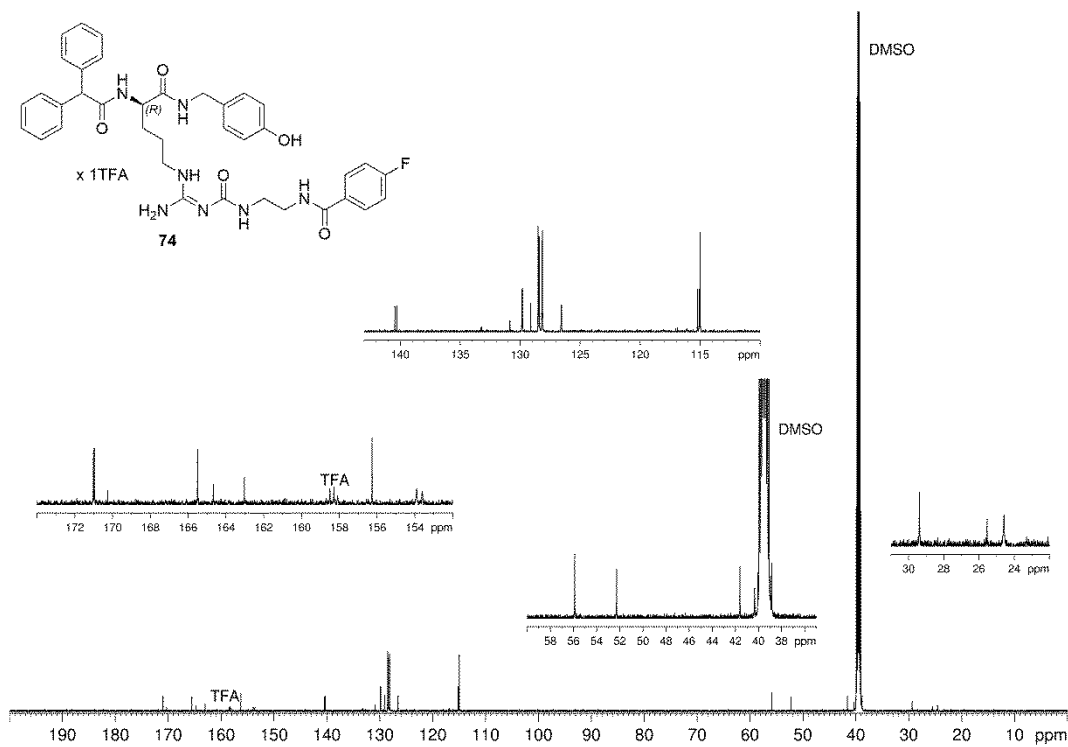

$^{13}\text{C}$ -NMR of compound **74**

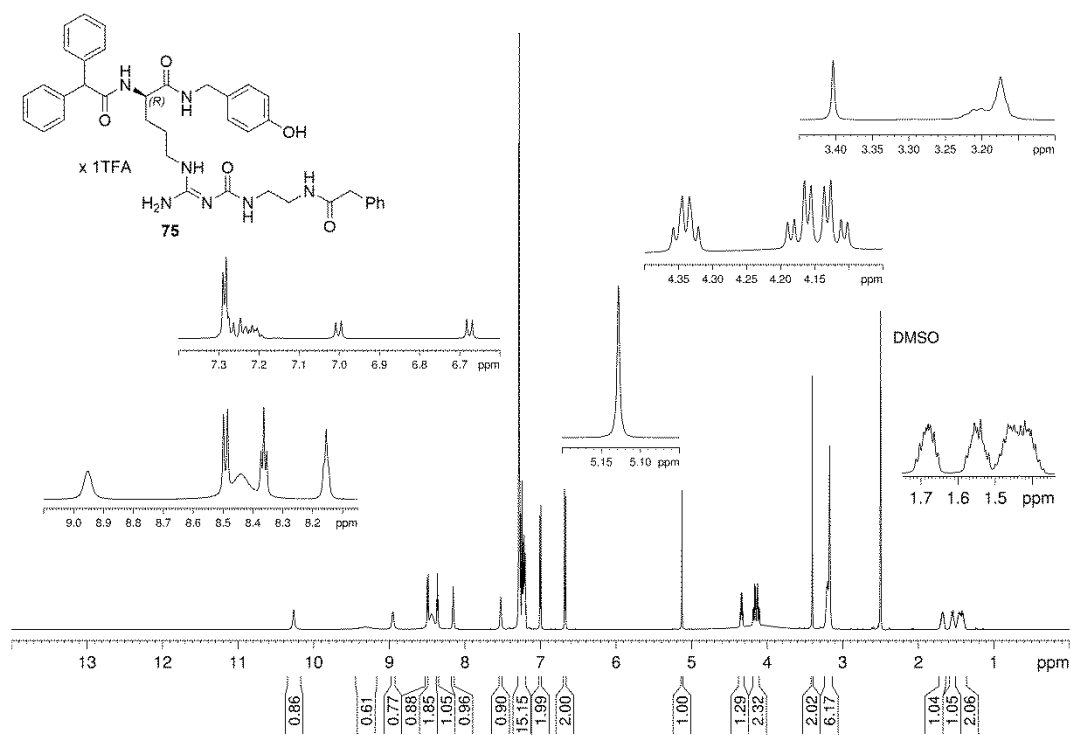

**<sup>1</sup>H-NMR of compound 75**

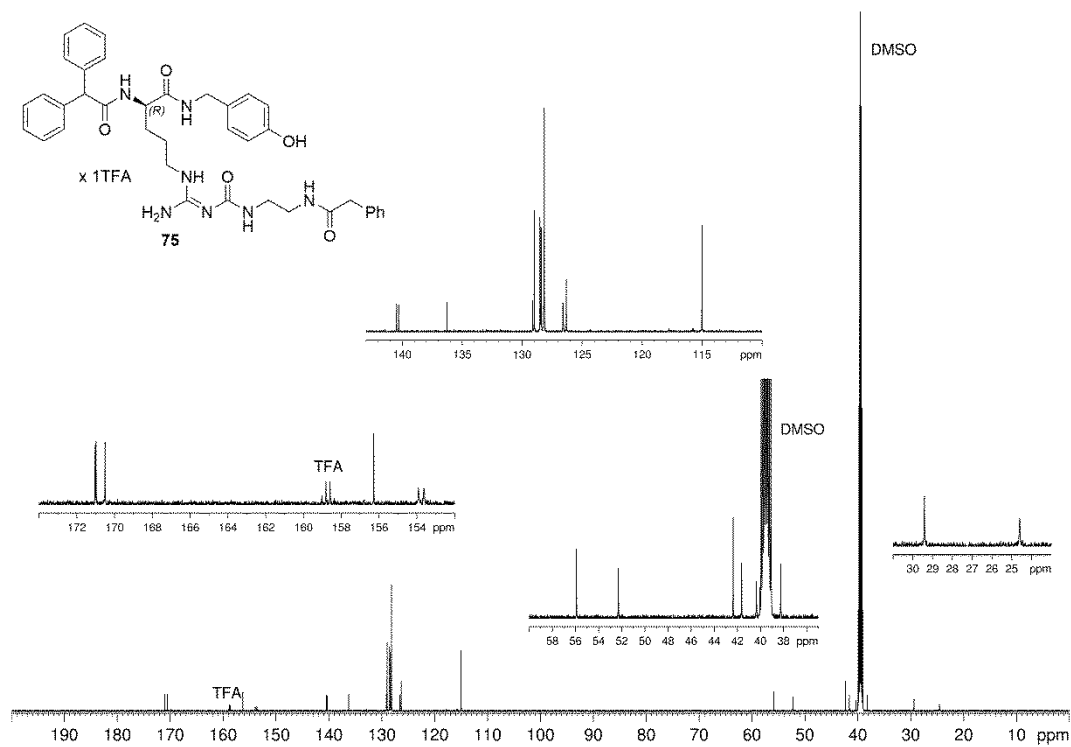

**<sup>13</sup>C-NMR of compound 75**

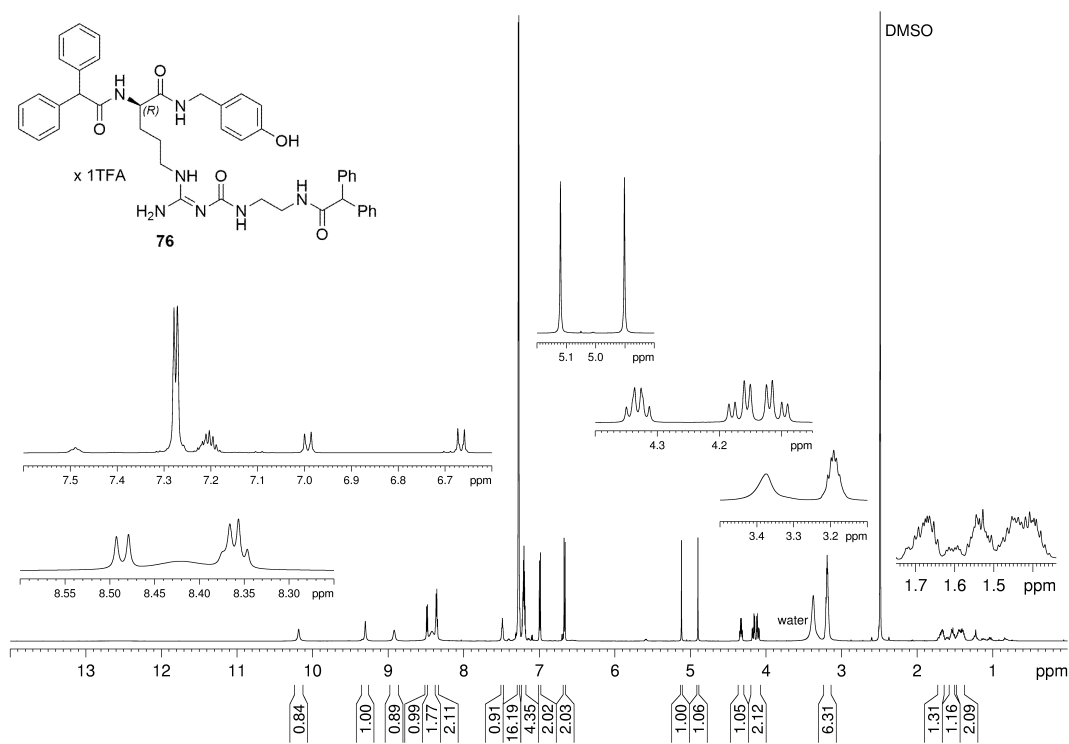

$^1\text{H}$ -NMR of compound **76**

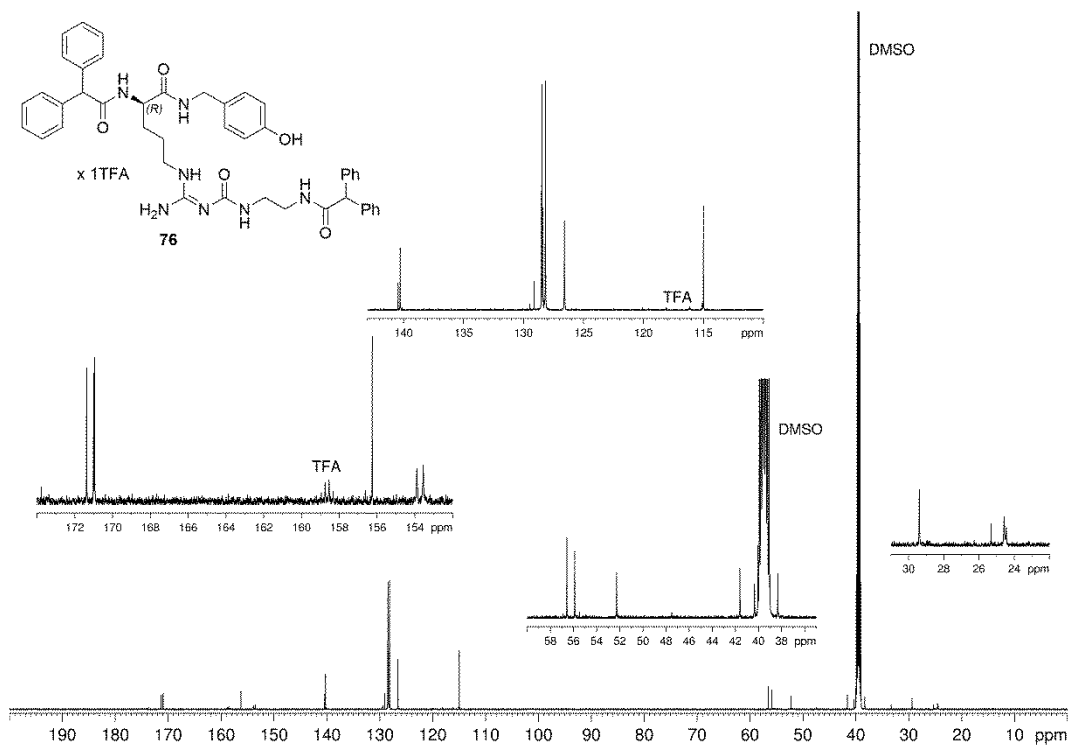

$^{13}\text{C}$ -NMR of compound **76**

## 5. RP-HPLC Purity Chromatograms of Compounds 53-76 and 78

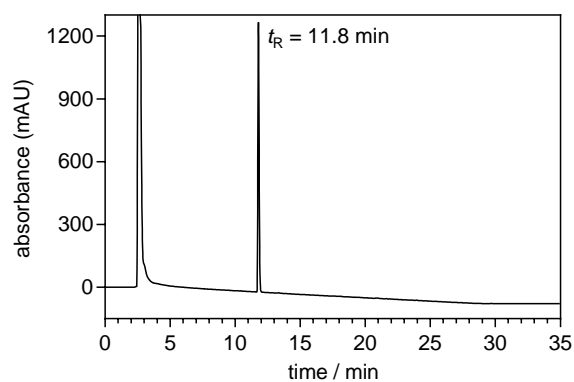

RP-HPLC chromatogram of **53**

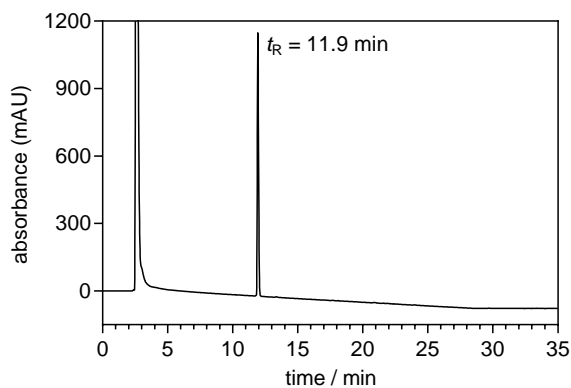

RP-HPLC chromatogram of **54**

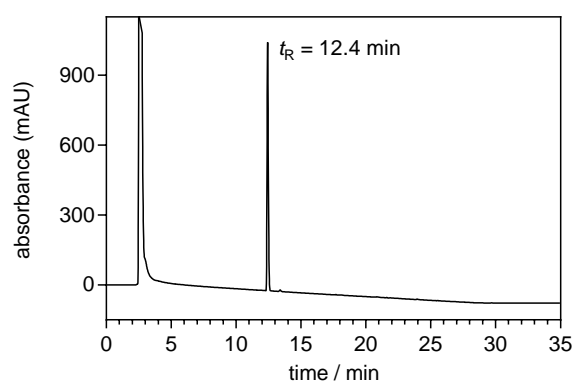

RP-HPLC chromatogram of **55**

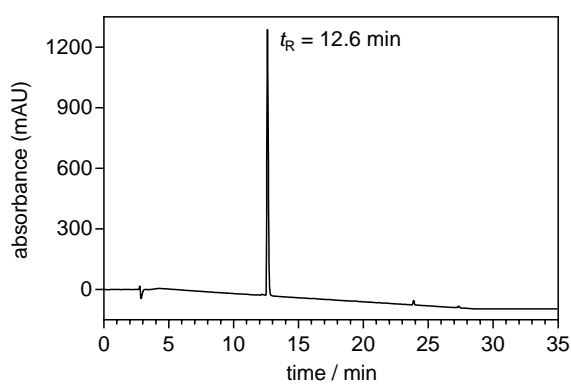

RP-HPLC chromatogram of **56**

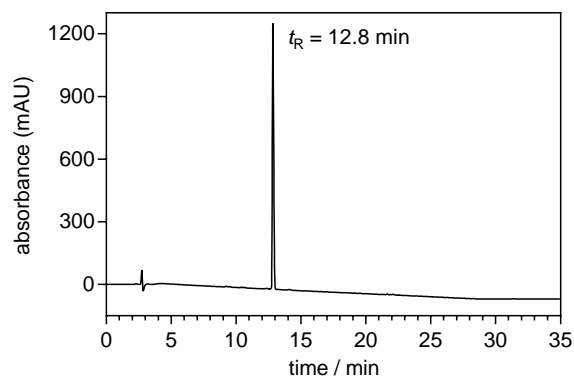

RP-HPLC chromatogram of **57**

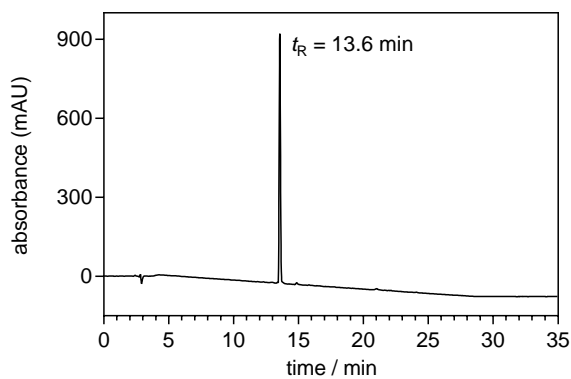

RP-HPLC chromatogram of **58**

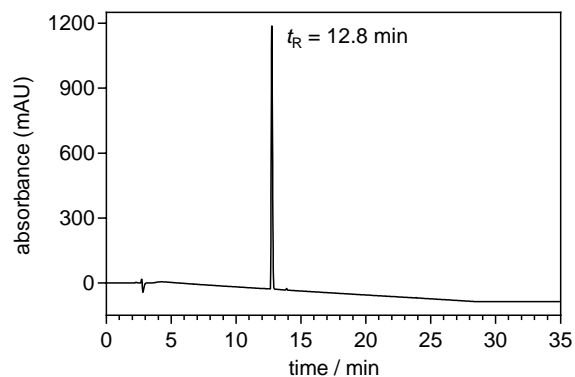

RP-HPLC chromatogram of **59**

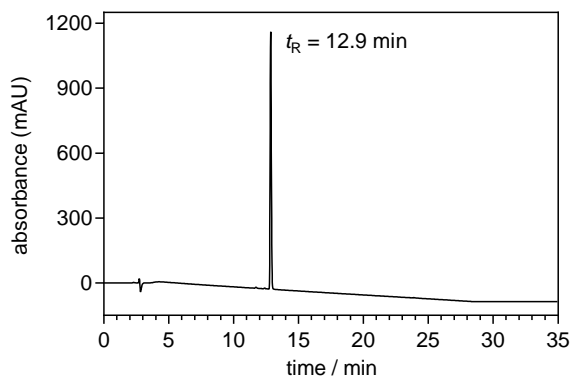

RP-HPLC chromatogram of **60**

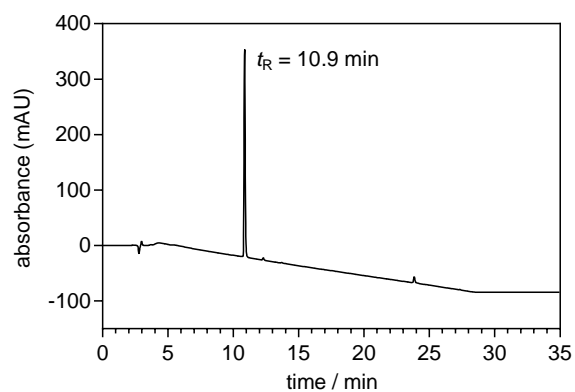

RP-HPLC chromatogram of **61**

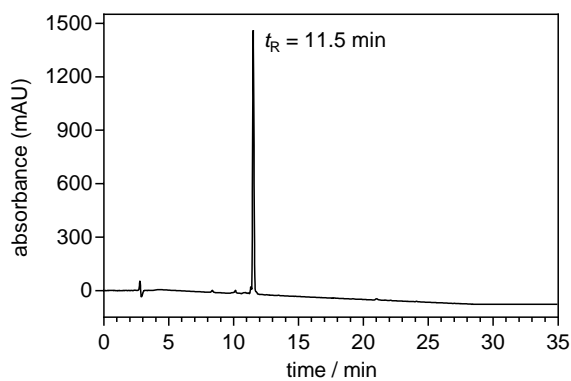

RP-HPLC chromatogram of **62**

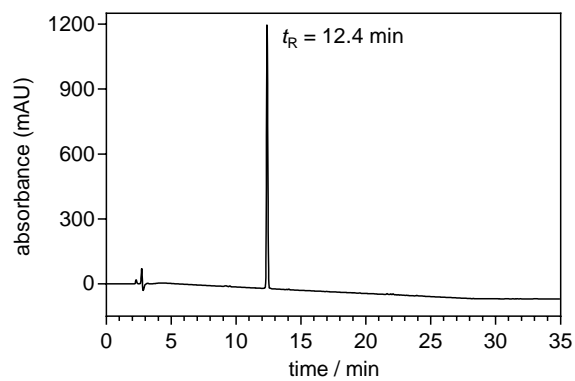

RP-HPLC chromatogram of **63**

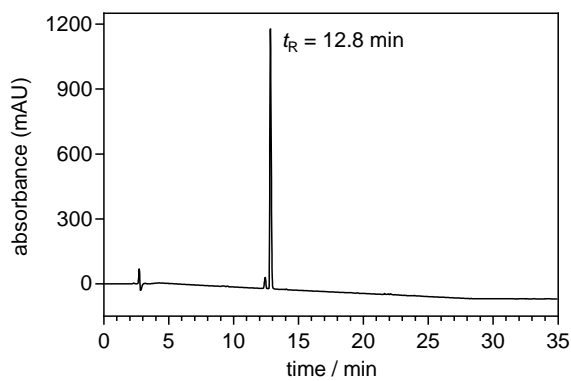

RP-HPLC chromatogram of **64**

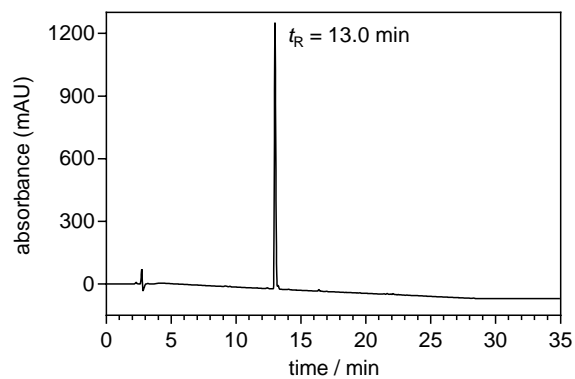

RP-HPLC chromatogram of **65**

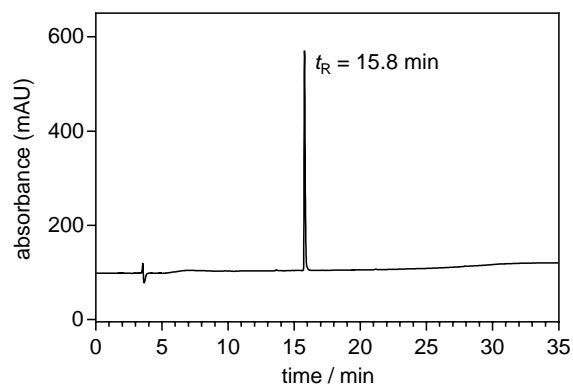

RP-HPLC chromatogram of **66**

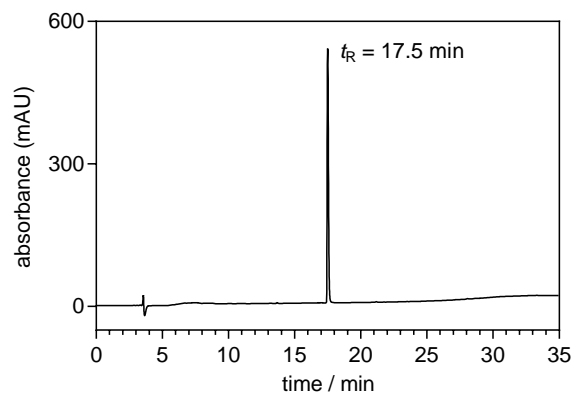

RP-HPLC chromatogram of **67**

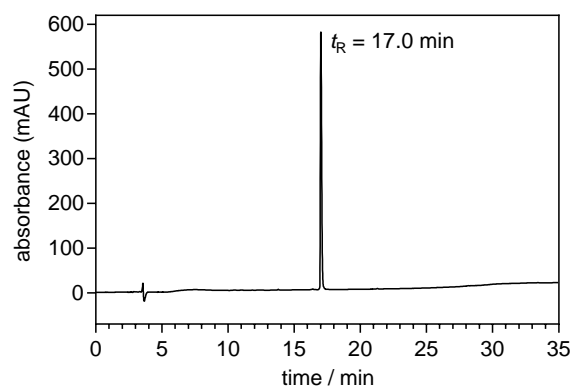

RP-HPLC chromatogram of **68**

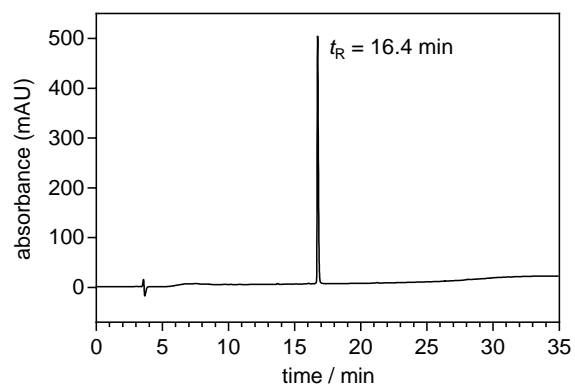

RP-HPLC chromatogram of **69**

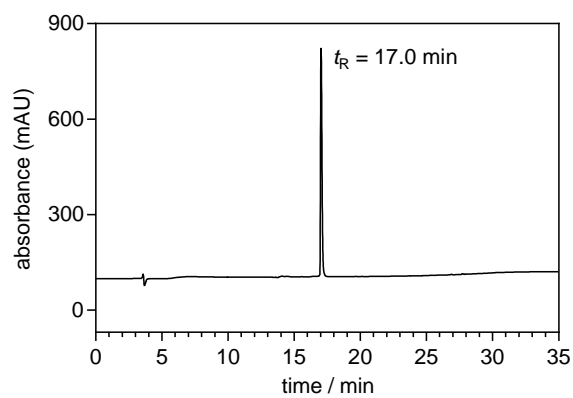

RP-HPLC chromatogram of **70**

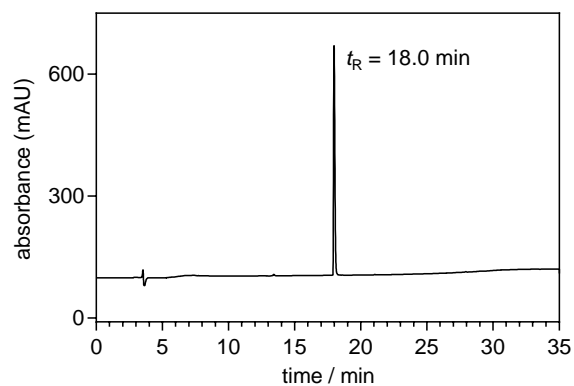

RP-HPLC chromatogram of **71**

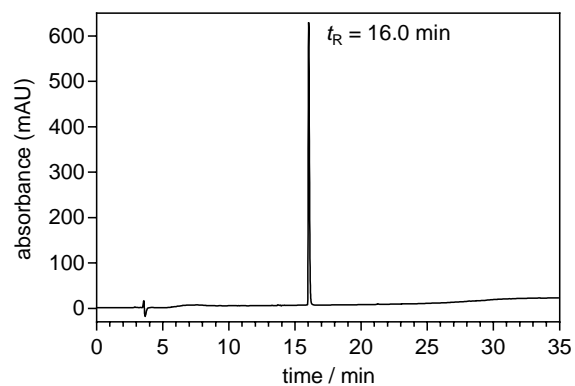

RP-HPLC chromatogram of **72**

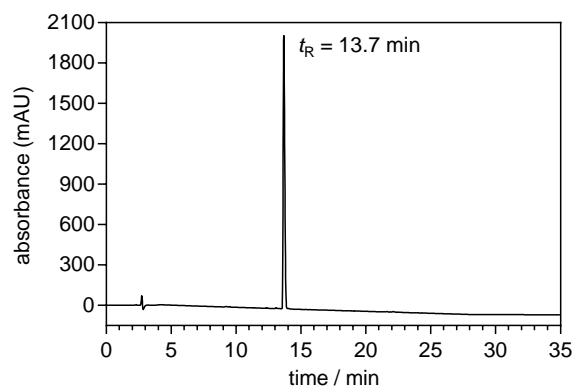

RP-HPLC chromatogram of **73**

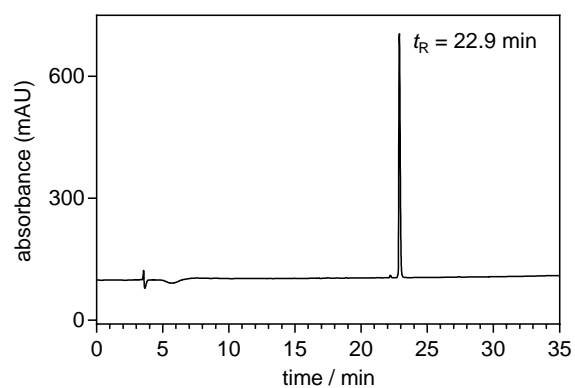

RP-HPLC chromatogram of **74**

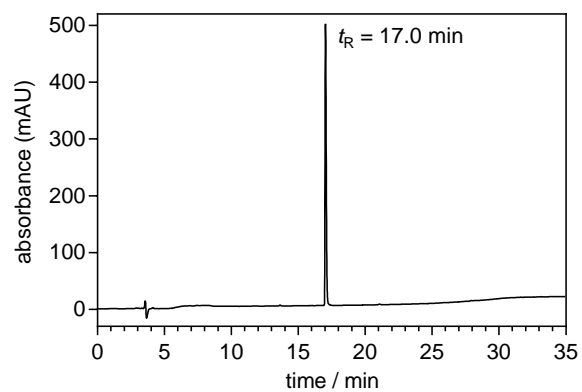

RP-HPLC chromatogram of **75**

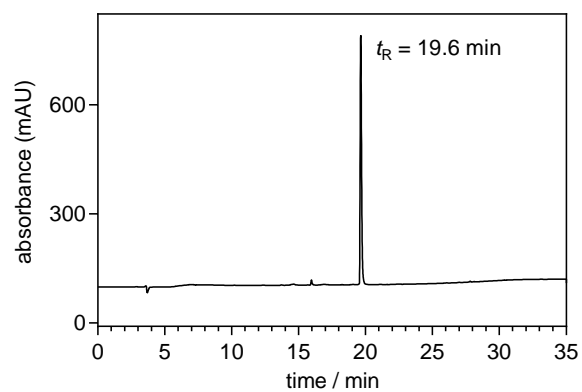

RP-HPLC chromatogram of **76**

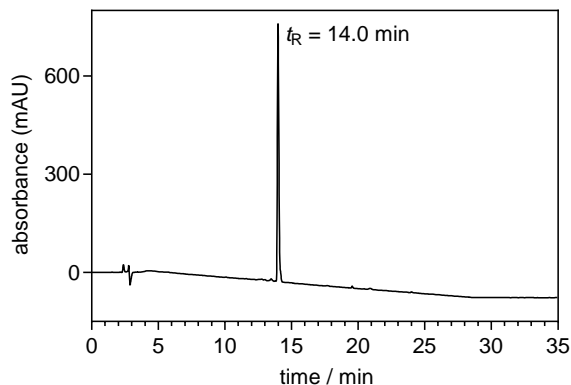

RP-HPLC chromatogram of **78** (220 nm)

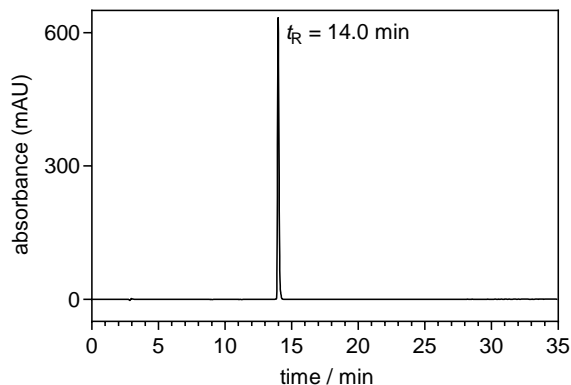

RP-HPLC chromatogram of **78** (480 nm)

## 6. Investigation of the Chemical Stability of Compounds **56**, **58-61**, **63** and **68**

To determine the chemical stability, compounds **56**, **58-61**, **63** and **68** (100  $\mu$ M) were incubated in buffer (10 mM HEPES, 150 mM NaCl, 5 mM KCl, 2.5 mM  $\text{CaCl}_2 \times \text{H}_2\text{O}$ , 1.2 mM  $\text{KH}_2\text{PO}_4$ , 1.2 mM  $\text{Mg}_2\text{SO}_4 \times \text{H}_2\text{O}$ , 25 mM  $\text{NaHCO}_3$ , pH 7) at rt for 24 h. The solution was diluted (1:1) with 10% aq TFA and the stability monitored at 6 time intervals (0 h, 1 h, 2 h, 4 h, 8 h and 24 h) by analytical HPLC analysis (*Method A*, 220 nm).

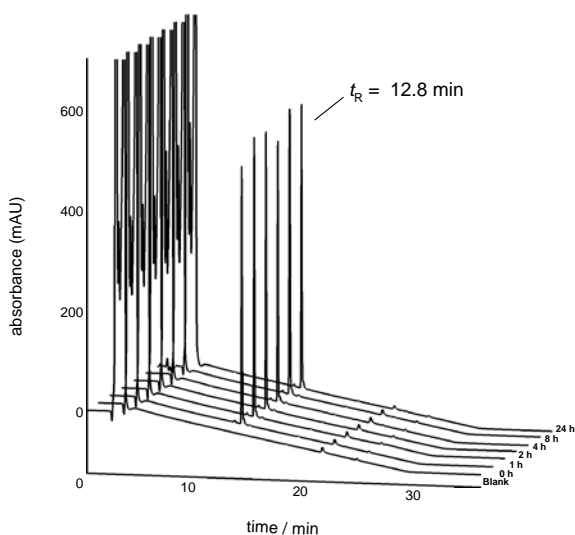

RP-HPLC chromatogram of **56**

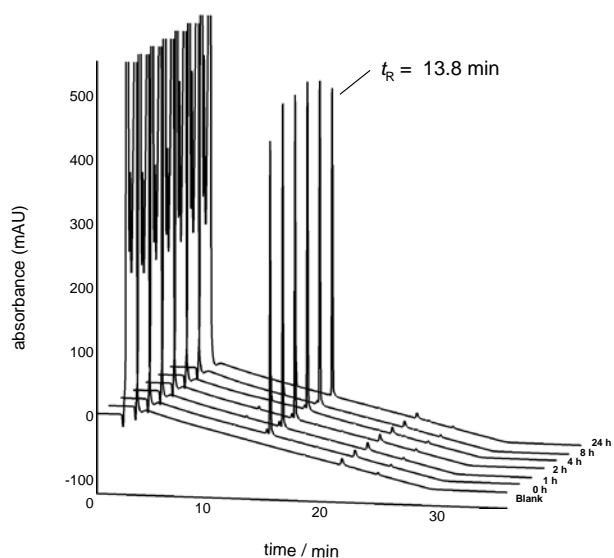

RP-HPLC chromatogram of **58**

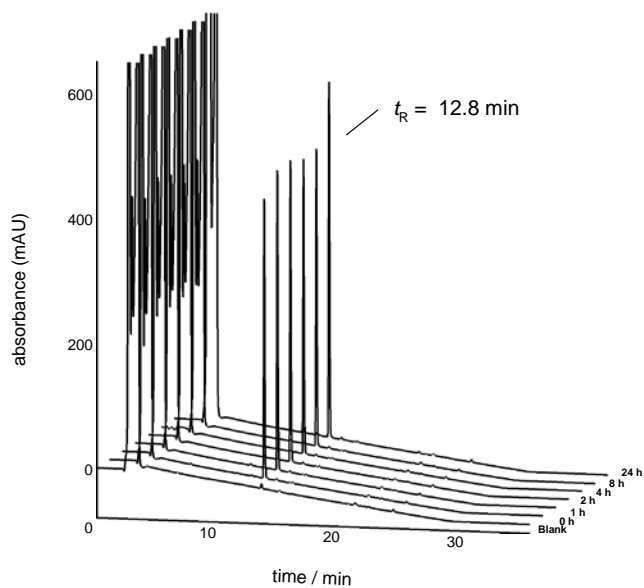

RP-HPLC chromatogram of **59**

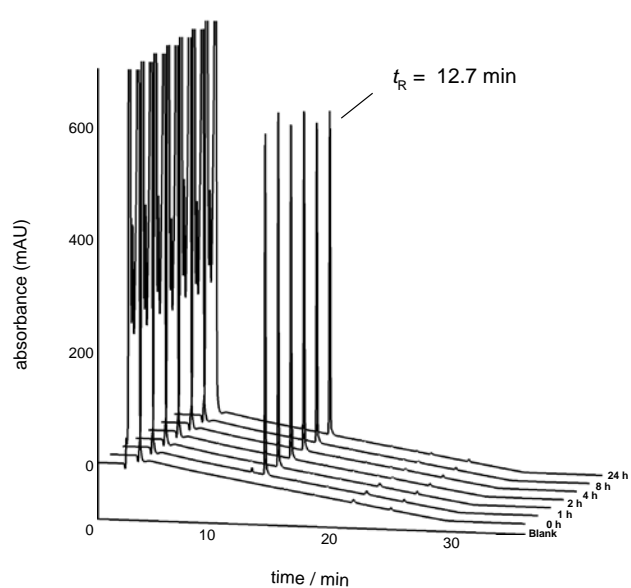

RP-HPLC chromatogram of **60**

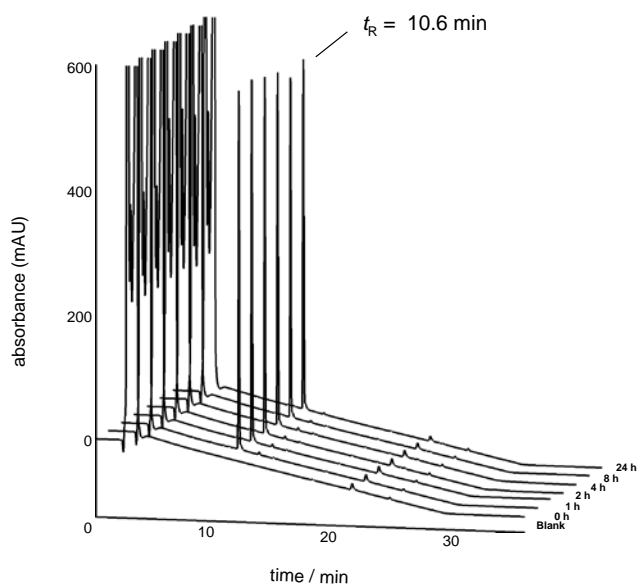

RP-HPLC chromatogram of **61**

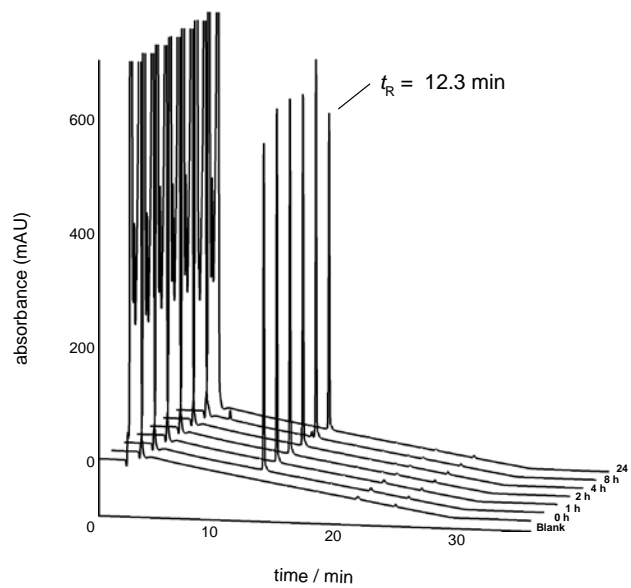

RP-HPLC chromatogram of **63**

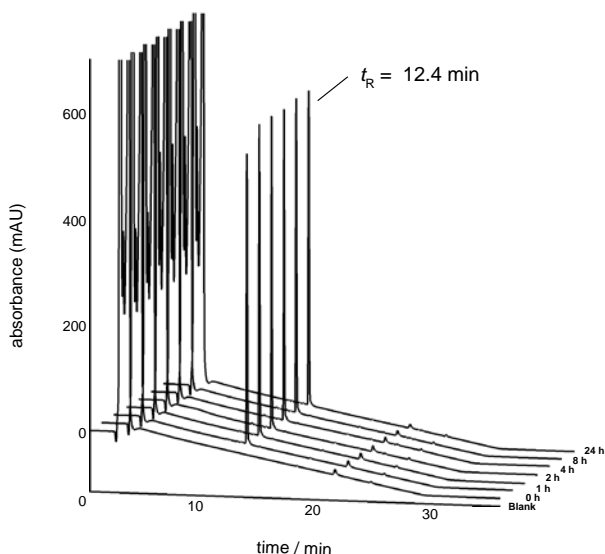

RP-HPLC chromatogram of **68**

## 7. References

1. M. Keller, S. Weiss, C. Hutzler, K. K. Kuhn, C. Mollereau, S. Dukorn, L. Schindler, G. Bernhardt, B. Konig and A. Buschauer, *J. Med. Chem.*, 2015, **58**, 8834-8849.
2. Z. Yang, S. Han, M. Keller, A. Kaiser, B. J. Bender, M. Bosse, K. Burkert, L. M. Kogler, D. Wifling, G. Bernhardt, N. Plank, T. Littmann, P. Schmidt, C. Yi, B. Li, S. Ye, R. Zhang, B. Xu, D. Larhammar, R. C. Stevens, D. Huster, J. Meiler, Q. Zhao, A. G. Beck-Sickinger, A. Buschauer and B. Wu, *Nature*, 2018, **556**, 520-524.
3. A. A. Bastian, A. Marcozzi and A. Herrmann, *Nat. Chem.*, 2012, **4**, 789.
4. E. Grochowski and J. Jurczak, *Synthesis*, 1977, **1977**, 277-279.
5. S. Laurent, F. Botteman, L. V. Elst and R. N. Muller, *Helv. Chim. Acta*, 2004, **87**, 1077-1089.
6. G. A. Andrade, A. J. Pistner, G. P. A. Yap, D. A. Lutterman and J. Rosenthal, *ACS Catal.*, 2013, **3**, 1685-1692.
7. K. Stembera, A. Buchynskyy, S. Vogel, D. Knoll, A. A. Osman, J. A. Ayala and P. Welzel, *ChemBioChem*, 2002, **3**, 332-340.
8. M. Keller, N. Pop, C. Hutzler, A. G. Beck-Sickinger, G. Bernhardt and A. Buschauer, *J. Med. Chem.*, 2008, **51**, 8168-8172.
9. WO2014/053968A1, 2014.
10. L. Wang, V. S. Guillen, N. Sharma, K. Flessa, J. Min, K. E. Carlson, W. Toy, S. Braqi, B. S. Katzenellenbogen, J. A. Katzenellenbogen, S. Chandarlapaty and A. Sharma, *ACS Med. Chem. Lett.*, 2018, **9**, 803-808.
11. M. Kim and K.-J. Han, *Synth. Commun.*, 2009, **39**, 4467-4472.
12. J. K. Kerkovius and F. Menard, *Synthesis*, 2016, **48**, 1622-1629.
13. N. Pluym, P. Baumeister, M. Keller, G. Bernhardt and A. Buschauer, *ChemMedChem*, 2013, **8**, 587-593.
14. K. Kuhn, PhD thesis, University of Regensburg, 2017.
